# Supplementary material for: L-type lectin receptor kinases in Nicotiana benthamiana and tomato and their role in Phytophthora resistance
Source: PubMed Central journal article supplement (PMC4623685; doi:10.1093/jxb/erv379), 2015-08-05
Supplement: supp_erv379_Figure_S1___Legend.pdf [file supp_erv379_Figure_S1___Legend.pdf]

A

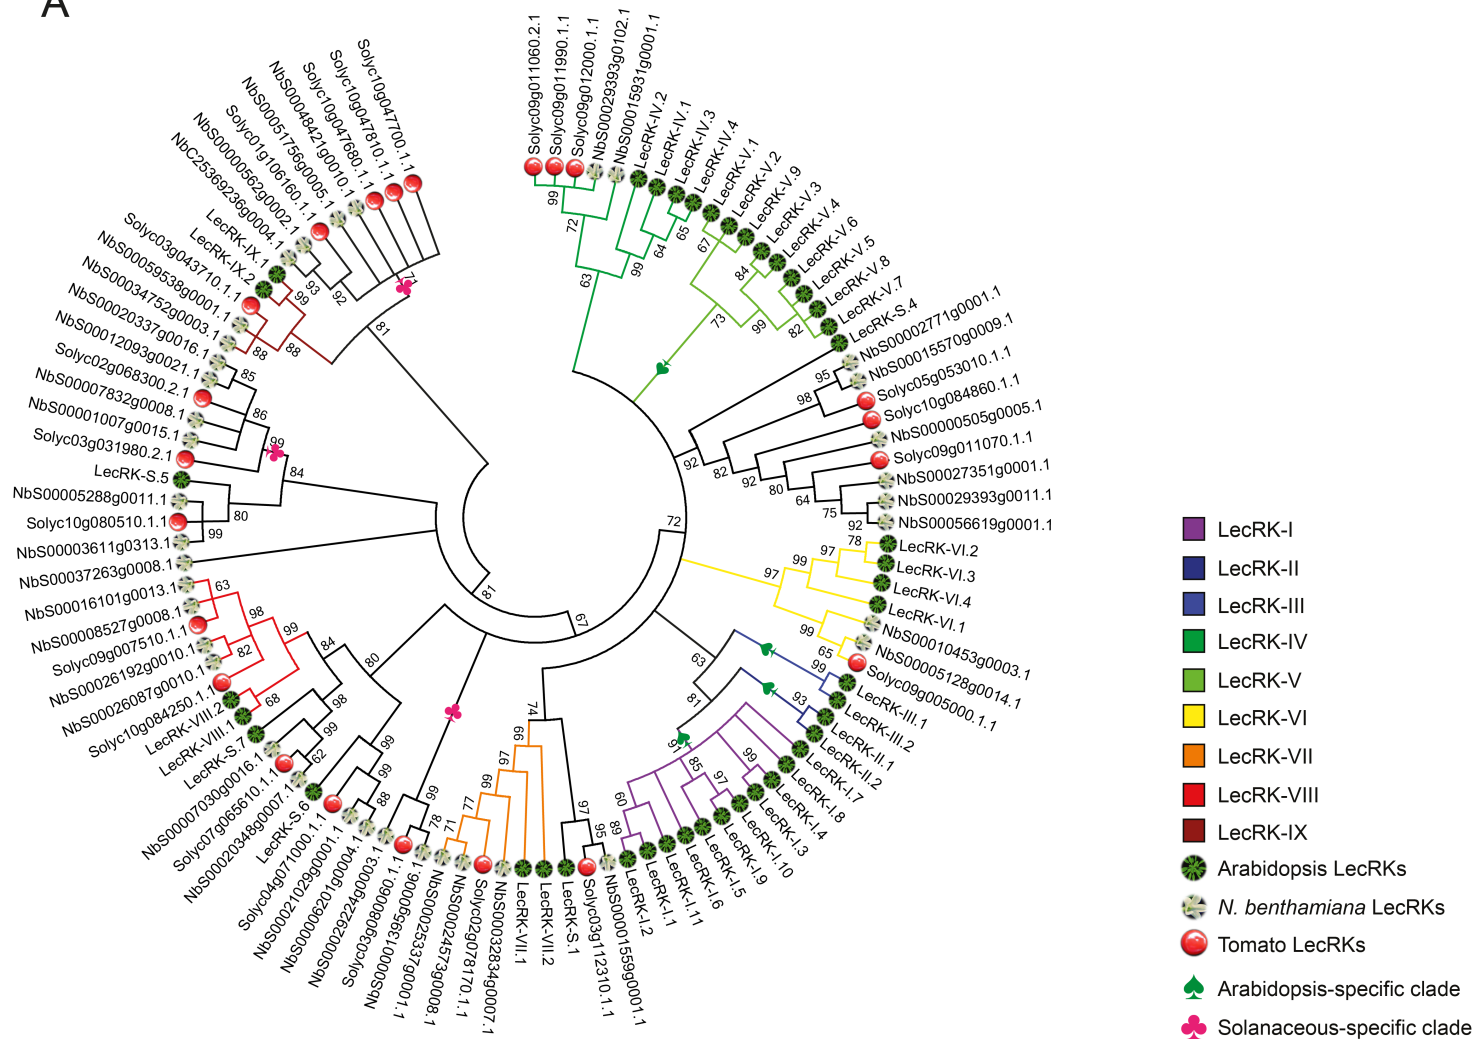

B

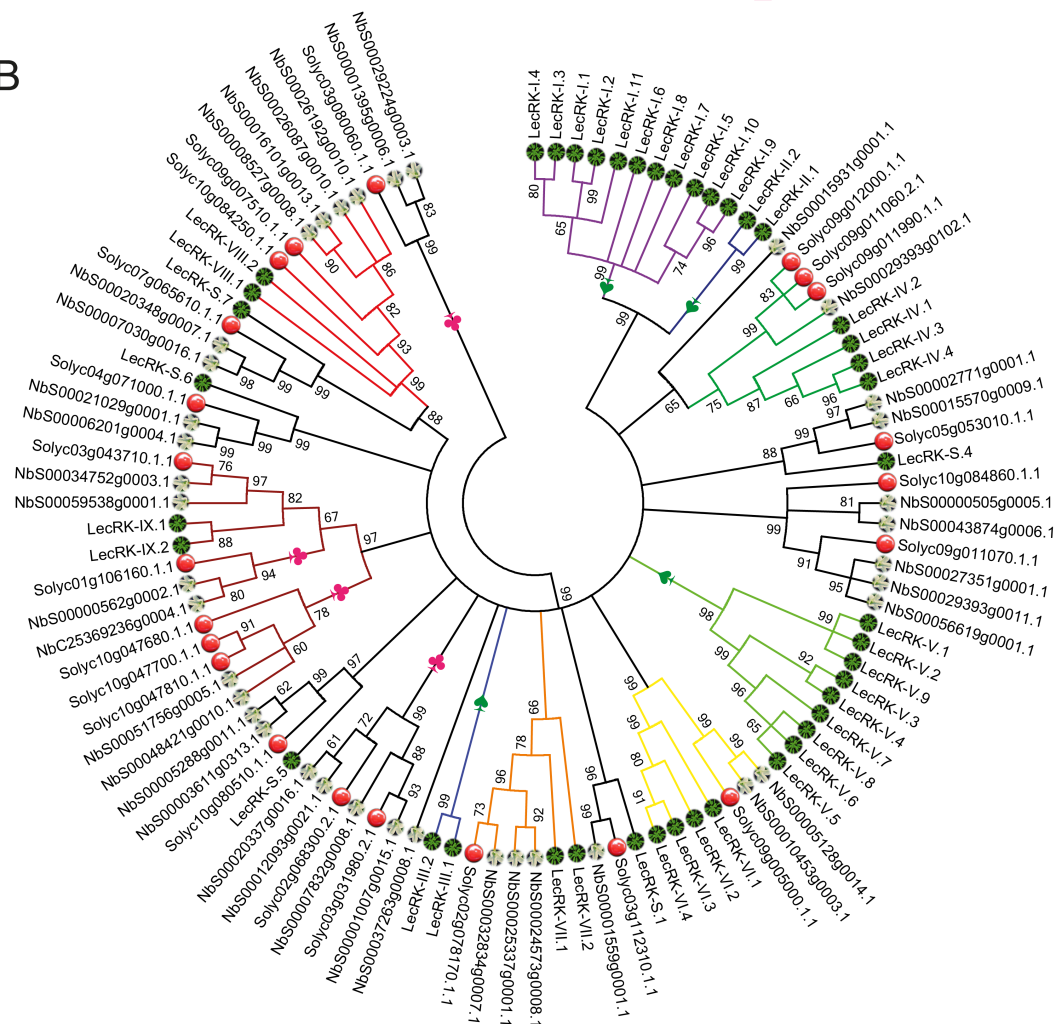

Supplementary Fig. S1.

Neighbor-Joining trees constructed based on the lectin domains (A) and kinase domains (B) of 43 AtLecRKs, 38 NbLecRKs and 22 SILEcRKs.
