# Supplementary material for: L-type lectin receptor kinases in Nicotiana benthamiana and tomato and their role in Phytophthora resistance
Source: PubMed Central journal article supplement (PMC4623685; doi:10.1093/jxb/erv379), 2015-08-05
Supplement: supp_erv379_Figure_S2___Legend.pdf [file supp_erv379_Figure_S2___Legend.pdf]

TRV:*PDS*

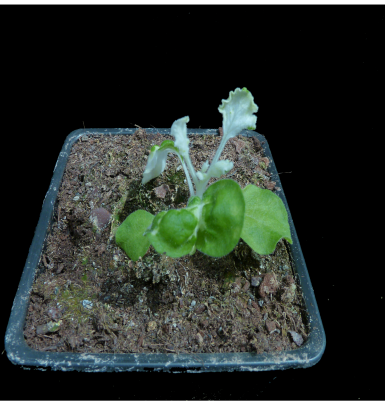

TRV:*GUS*

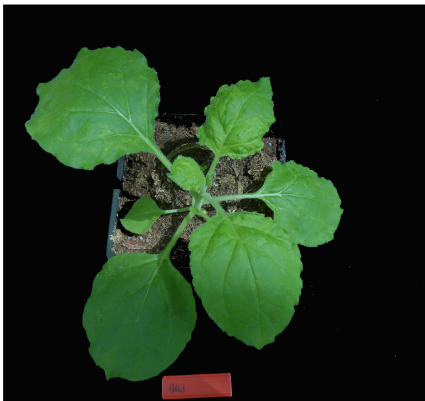

TRV:*NbVIII.2*

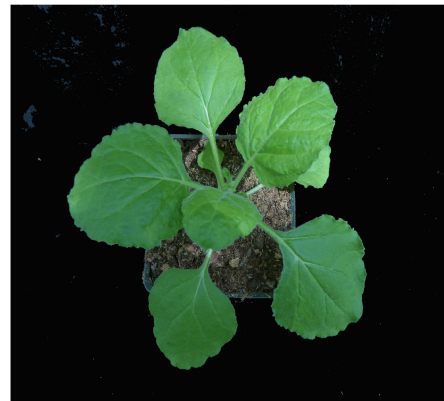

TRV:*NbIX*

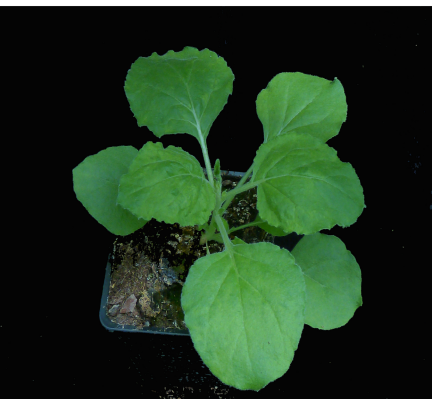

TRV:*NbX*

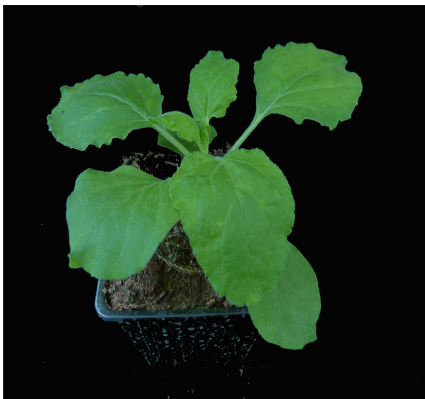

TRV:*NbXIII*

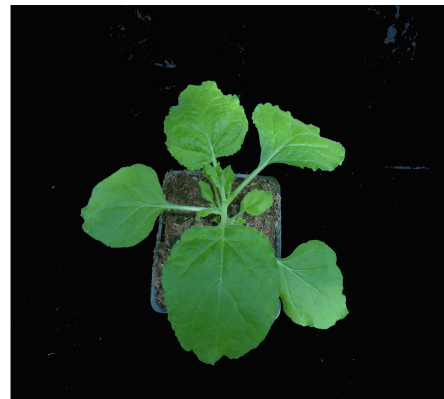

TRV:*NbXIV*

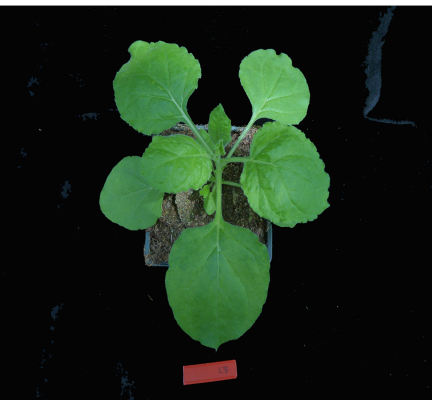

TRV:*NbXVII*

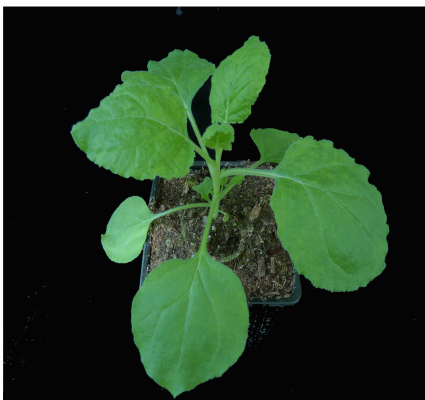

TRV:*NbXVIII*

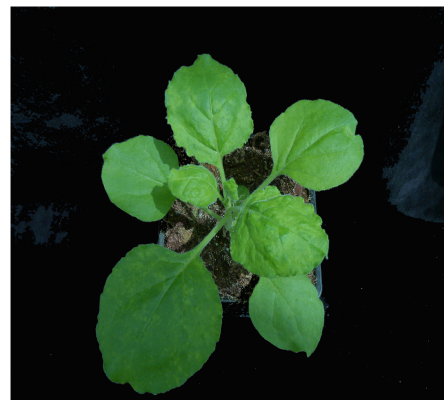

**Supplementary Fig. S2.**

Morphology of *N. benthamiana* plants treated by TRV:*NbLecRKs*, TRV:*PDS* and TRV:*GUS*.
