# Supplementary material for: L-type lectin receptor kinases in Nicotiana benthamiana and tomato and their role in Phytophthora resistance
Source: PubMed Central journal article supplement (PMC4623685; doi:10.1093/jxb/erv379), 2015-08-05
Supplement: supp_erv379_Figure_S3___Legend.pdf [file supp_erv379_Figure_S3___Legend.pdf]

|                    |      |                                                               |
|--------------------|------|---------------------------------------------------------------|
| NbS00026192g0010.1 | 1315 | CTTATGCCTAATGGGAGTCTTGATAAGGCATTATTTGAATCAAGAATGATTCTACCTTGG  |
| NbS00026087g0010.1 | 1315 | CTTATGCCTAATGGGAGTCTTGATAAGGCATTATTTGAATCAAGAATGATTCTACCTTGG  |
| NbVIII.2           | 1    | -----GATTCGGCATTATTTGAATCAAGAATGATTCTACCTTGG                  |
| NbS00016101g0013.1 | 1318 | TTTATGCCAATGGTAGTCTTGATAAGGCATTATTTGATCAAGAATGATTCTACCTCCATGG |
| NbS00026192g0010.1 | 1375 | GTACATAGGAGGAAAATTTTGCTAGGTGTGCTTCAGCCTTGGCATATTTACATCAAGAA   |
| NbS00026087g0010.1 | 1375 | CTACATAGGAGGAAAATTTTGCTAGGTGTGCTTCAGCCTTGGCATATTTACATCAAGAA   |
| NbVIII.2           | 41   | CTACATAGGAGGAAAATTTTGCTAGGTGTGCTTCAGCCTTGGCATATTTACATCAAGAA   |
| NbS00016101g0013.1 | 1378 | CTACATAGGAGGAAAATTTGCTTAGGTGTGCTTCAGCCTTGCATATTTACATCAAGAA    |
| NbS00026192g0010.1 | 1435 | TGTGAAAACCCAGGTGATTCACAGGGATATAAAGAGTAGTAACATTATGTTGATGAAGGG  |
| NbS00026087g0010.1 | 1435 | TGTGAAAATCAGGTGATTCATAGGGATATAAAGAGTAGTAACATTATGTTGATGAAGGG   |
| NbVIII.2           | 101  | TGTGAAAATCAGGTGATTCATAGGGATATAAAGAGTAGTAACATTATGTTGATGAAGGG   |
| NbS00016101g0013.1 | 1438 | TGTGAAAATCAGTTATGTTAGGGATATAAAGAGTAGTAATATTATGTTGATGAAGGG     |
| NbS00026192g0010.1 | 1495 | TTCAATGCAAGATTAGGTGATTTTGGATTAGCAAGACAAGTTGAACATGACAAGTCCCC   |
| NbS00026087g0010.1 | 1495 | TTCAATGCAAGATTAGGTGATTTTGGATTAGCAAGACAAGTTGAACATGACAAGTCCCC   |
| NbVIII.2           | 161  | TTCAATGCAAGATTAGGTGATTTTGGATTAGCAAGACAAGTTGAACATGACAAGTCCCC   |
| NbS00016101g0013.1 | 1498 | TTTAAATGCAAGATTAGGTGATTTTGGCTTAGCAAACAAATTGAACATGACAATCTCCT   |
| NbS00026192g0010.1 | 1555 | GATGTAACAGTAGCAGCTGGGACAATGGGCTACTTGGCTCCTGAATACTTGTTAACCGGA  |
| NbS00026087g0010.1 | 1555 | GATGCAACAGTAGCAGCCGGGACAATGGGCTACTTGGCTCCTGAATACTTGTTAACCGGA  |
| NbVIII.2           | 221  | GATGCAACAGTAGCAGCCGGGACAATGGGCTACTTGGCTCCTGAATACTTGTTAACCGGA  |
| NbS00016101g0013.1 | 1558 | GATGCCACAGTAGCAGCAAGACAATGGGACTACTTAGCACTGAATATTTTAAACCGGT    |
| NbS00026192g0010.1 | 1615 | AGAGCAACCGAAAAAAGTATGTTTTAGCTATGGAGCTGTGGTTCTTGAAGTGGAAGT     |
| NbS00026087g0010.1 | 1615 | AGAGCAACCGAAAAAAGTATGTTTTAGCTATGGAGCAGTGTCTCTTGAAGTGGAAGT     |
| NbVIII.2           | 281  | AGAGCAACCGAAAAAAGTATGTTTTAGCTATGGAGCAGTGTCTCTTGAAGTGGAAGT     |
| NbS00016101g0013.1 | 1618 | CGAGCAAGTAAAAAAGTATGTTTTAGCTATGGCGCAGTGTCTCTTGAAGTGGAAGT      |
| NbS00026192g0010.1 | 1675 | GGAAGGAGGCCAATTGAGAGGGAAACAACAAGAGTTGAGAAAGTTGGAGTGAATAGTAAC  |
| NbS00026087g0010.1 | 1675 | GGAAGGAGGCCAATTGAGAGGGAAACAACAAGAGTTGAGAAAGTTGGAGTGAATAGTAAC  |
| NbVIII.2           | 341  | GGAAGGAGGCCAATTGAGAGGGAAACAACAAGAGTTGAGAAAGTTGGAGTGAATAGTAAC  |
| NbS00016101g0013.1 | 1678 | GGTAGTAGGCCAATTGAGAAAGAAACAATCGGGTGGGAAAGTTGAAATTAATAGCAAT    |
| NbS00026192g0010.1 | 1735 | TTAGTTGAATGGGTTTGGGGATTGCATAGAGAAGGGAATTTGCTAATGGCAGCAGATTCA  |
| NbS00026087g0010.1 | 1735 | TTAGTTGAATGGGTTTGGGGATTGCATAGAGAAGGGAATTTGCTAATGGCAGCTGATTCA  |
| NbVIII.2           | 401  | TTAGTTCCCGGG-----                                             |
| NbS00016101g0013.1 | 1738 | TTCTGGAAATGGGTTTGGGGATTACATAAGAAGGAGGTTTATACAGCAGCTGATTCA     |
| NbS00026192g0010.1 | 1855 | TGTTCAACCTGACCCTATGGTTAGACCAACAATGAGAAGTGTGGTCCAAATGCTAGTA    |
| NbS00026087g0010.1 | 1855 | TGTTCAACCTGACCCTATGGTTAGACCAACAATGAGAAGTGTGGTCCAAATGCTAGTA    |
| NbVIII.2-2         | 1    | -----GACCCTATGGTTAGACCAACAATGAGAAGTGTGGTCCAAATGCTAGTA         |
| NbS00016101g0013.1 | 1858 | TGTTCAACCTGACCCTATGGTTAGACCAACAATGAGAAGTGTGGTCCAAATGCTAGTT    |
| NbS00026192g0010.1 | 1915 | GGTGAAGCTGAAGTTCCTATTGTCCCAAGAAGTAAAGCCTTCTATGAGTTTCAGCACATCA |
| NbS00026087g0010.1 | 1915 | GGTGAAGCTGAAGTTCCTATTGTCCCAAGAAGTAAAGCCTTCTATGAGTTTCAGCACATCA |
| NbVIII.2-2         | 49   | GGTGAAGCTGAAGTTCCTATTGTCCCAAGAAGTAAAGCCTTCTATGAGTTTCAGCACATCA |
| NbS00016101g0013.1 | 1918 | GGTGAAGCTGAAGTTCCTATTGTCCCTAGAGCTAAGCCAACTATGAGTTTTCAGCACATCT |

|                    |      |                                                              |
|--------------------|------|--------------------------------------------------------------|
| NbS00026192g0010.1 | 1975 | CATCTTCTAATGACTTTGCAAGATAGTGTTTCTGATTTGAATGGTATGATCACACTTTCC |
| NbS00026087g0010.1 | 1975 | CATCTTCTAATGACTTTGCAAGATAGTGTTTCTGATTTGAATGGTATGATCACACTTTCA |
| NbVIII.2-2         | 109  | CATCTTCTAATGACTTTGCAAGATAGTGTTTCTGATTTGAATGGTATGATCACACTTTCC |
| NbS00016101g0013.1 | 1978 | CATCTGCTAATGACTTTGCAAGATAGTGTTTCTGACTTGAATGGTATGATCACACTTTCC |
|                    |      |                                                              |
| NbS00026192g0010.1 | 2035 | TCTTCATCATCTGAAAACAGTTTCACTGGTGTTC CAATGGGATGGACTTGGTCTAA    |
| NbS00026087g0010.1 | 2035 | ACTTCATCATCTGAAAACAGCTTCAATGGTGTTC CAATGGCATGGACTTGGTCTAA    |
| NbVIII.2-2         | 169  | ACTTCATCATCTGAAAACAGTTTCACTGGTGTTC CATGGGATGA---TGGA----     |
| NbS00016101g0013.1 | 2038 | ACGTCCTTCATCTGAAAATAGCTTCAATGGTGTTCGTGTTGGTATGGACCTAGTCTAG   |

**Supplementary Fig. S3.** Sequence alignment of NbS00016101g0013.1, NbS00026192g0010.1, NbS00026087g0010.1 and the fragments used for silencing. NbVIII.2 represents the fragment used in this study, while NbVIII.2-2 represents the fragment used by Kanzaki *et al.* (2008).
