# Supplementary material for: L-type lectin receptor kinases in Nicotiana benthamiana and tomato and their role in Phytophthora resistance
Source: PubMed Central journal article supplement (PMC4623685; doi:10.1093/jxb/erv379), 2015-08-05
Supplement: supp_erv379_Figure_S4___Legend.pdf [file supp_erv379_Figure_S4___Legend.pdf]

3 dpi

TRV:*GUS*

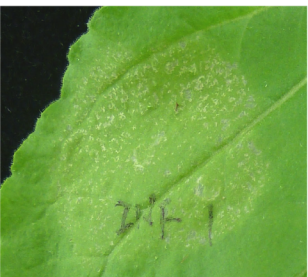

TRV:*NbVIII.2*

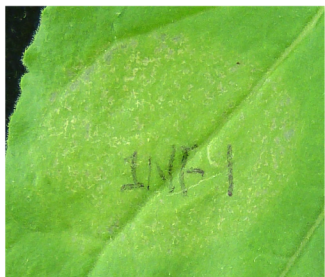

6 dpi

TRV:*GUS*

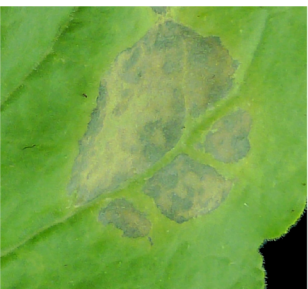

TRV:*NbVIII.2*

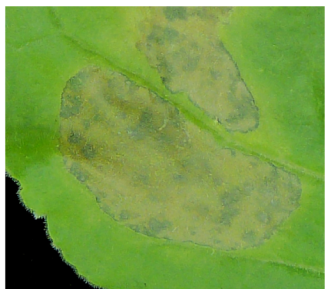

### Supplementary Fig. S4.

Cell death induced by INF1 on TRV:*GUS*- and TRV:*NbVIII.2*-treated plants. Pictures were taken at three and six days after syringe-infiltration. Each experiment consisted of at least six infiltration sites. This experiment was repeated twice with similar results.
