# Supplementary material for: L-type lectin receptor kinases in Nicotiana benthamiana and tomato and their role in Phytophthora resistance
Source: PubMed Central journal article supplement (PMC4623685; doi:10.1093/jxb/erv379), 2015-08-05
Supplement: supp_erv379_Figure_S5___Legend.pdf [file supp_erv379_Figure_S5___Legend.pdf]

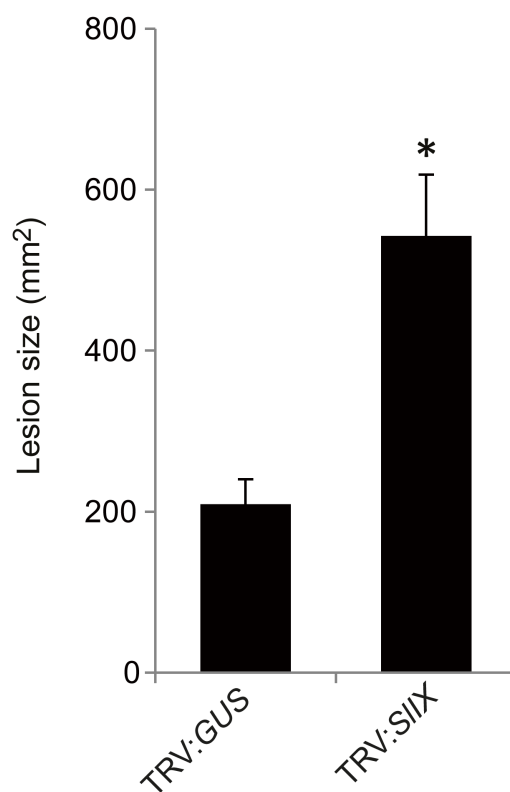

**Supplementary Fig. S5.**

Quantified lesion sizes on TRV:*GUS*- and TRV:*SIIX*-treated tomato leaves three days after inoculation with *P. capsici* plugs (Ø 0.5 cm). This experiment included 16 leaves from four independent plants treated with each construct. \* indicates significant difference ( $p < 0.05$ ) in lesion sizes between TRV:*GUS*- and TRV:*SIIX*-treated plants according to a two-tailed *t* test. This experiment was repeated twice with similar results.
