# Supplementary material for: L-type lectin receptor kinases in Nicotiana benthamiana and tomato and their role in Phytophthora resistance
Source: PubMed Central journal article supplement (PMC4623685; doi:10.1093/jxb/erv379), 2015-08-05
Supplement: supp_erv379_Supplemental_File_S1.pdf [file supp_erv379_Supplemental_File_S1.pdf]

## Supplementary File S1.

LecRK sequences of *N. benthamiana* and tomato. Highlighted protein sequences were shown to be inconsistent with RNA-seq data. Revised sequences are labelled 'Corrected'. Introns within genomic sequences are underlined.

### *N. benthamiana* LecRK sequences

>NbS00015931g0001.1 Genbank ID: KT225303  
MFFKILALIMAAVFLVTSDELGFTYNGFNKRANLTIDGIAQLTPRGLLQLTNTSRLQKGHAFY  
PTPINFKNLPNGSNFSFSTTFVFAIVPSVLPGHGMAFVIAPVGGVLVQTLPSFPLGLFNDNTTG  
EATNHIFAVEFDLQNFNDIDGNHVGIDINELKSVDSPAGYYASNSVKLNMTLASGQP  
MQAWVDYNGMAKQINVTLAPMNMKNVPLLSISCDLSPILNRTMFIGFSGSTGSVVSTQYV  
LGWSFRMNGIAQGLDLARLPKLPVGPVKPKSKLLLIALLPLISAVVVVIAFSVLIYYVGRKRKFAE  
LLEDWELEYGPHRFKYKDLIATKGFANKELLGCGGFGRVYRGILPNSALEIAVKRVSHESKQ  
GLREFVAEIVSIGRLRHRNLVPFLGYCRRKGELLVYECMPNGSLDKFLYDKPRCALKNWNR  
FRVIKGVASALVYLHEEWEQVVIHRDVKASNVLLDSELNAKLGDFGLARLYDHGSDPLTTHVI  
GTVGYLAPEQTRTGKTTCSVDYAFGAFLLLEVACGRRPIDPRVSDENIVLDYVVFSCWAKG  
DILEAIDQNLGSDYVKEEVELVLKLGVLCLQTQPTARPSMRQVLLYLEDDLPLPEISLMQTSST  
SLTLAGFDHFPLSYPTSADQPLSWPTSVTNSILSNGR

>NbS00015931g0001.1 Genbank ID: KT225303  
ATGTTTTTCAAGATCTTGGCCTTGATTATGGCTGCTGTTTTTGGTCTTGTAACCTCTGAAG  
ATCTTGGATTTACTTACAATGGCTTCAATAAAGAGCAAATTTAACTATTGATGGCATAGC  
ACAGTTGACACCAAGAGGCTTATTACAGCTAACAAATACTTCTCGGCTGCAGAAAGGCCA  
TGCTTTTTACCCTACACCAATAAATTTCAAGAACTTACCAAATGGCTCAAATTTCTCTTTTT  
CTACAACCTTTTGTCTTTGCTATAGTGCCTTCAGTTTTGCCTGGTCATGGCATGGCTTTTTGT  
AATTGCACCTGTGCGGAGGATTAGTACAAACTTCCAAGCCATTTCTAGGCTTATTTAAT  
GATAACACTACTGGTGAAGCCACAAATCATTTTTCGCGGTGGAGTTTGATACCTTCAG  
AACAGAGAATTC AATGATATTGATGGTAACCATGTTGGAATTGACATCAACGAATTA A AAT  
CTGTTGATTCAAAGCCAGCAGGTTATTATGCTAGCAATAGTGTCAAACCTCAATAACATGA  
CTCTTGCTAGTGGCCAACCAATGCAAGCTTGGGTGGACTATAATGGTATGGCAAAGCAA  
ATTAATGTCACATTGGCTCCAATGAATATGGCAAACCAATGTTCTCTTTTTGTCTATAT  
CCTGTGATCTTTCACCAATTTTAAATAGAACCATGTTTATTGGCTTCTCTGGATCCACAGG  
CTCAGTTGTTTCAACACAATATGTTCTTGGATGGAGCTTTAGAATGAATGGAATAGCTCAA  
GGGCTTGATCTTGCTAGGCTTCC AAGCTTCTCGAGTTGGACCGAAGAAACCGTCCAA  
ACTCTTGTTGATTGCTTTGCCATTGATATCAGCAGTTGTTGTAGTAATAGCCTTCTCTGTG  
TTAATTTATTATGTAGGAAGGAAAAGGAAGTTTGCTGAATTGCTTGAAGATTGGGAGCTT  
GAATATGGCCCTCATAGGTTCAAGTATAAAGATCTTTATATTGCCACCAAGGATTTGCAA  
ACAAAGAGTTGTTGGGTTGTTGGGGGTTTTGGCAGAGTTTATAGAGGCATATTACCTAATT  
CTGCTCTTGAGATAGCAGTCAAGAGGGTATCTCATGAATCAAACAAGGGTTGAGGGAA  
TTTTGTAGCAGAAATTGTTAGTATTGGTCGACTACGCCATAGAACTTAGTACCATTTTTAG  
GCTATTGTAGGAGAAAAGGAGAGTTGCTTTTGGTTTATGAATGTATGCCTAATGGAAGTC  
TTGATAAGTTTCTATATGACAAACCAAGATGTGCTCTCAAGTGGAAACCAAGATTTTCGTGT  
CATTAAAGGCGTAGCATCAGCGCTAGTCTATCTGCACGAAGAATGGGAACAAGTTGTAAT  
TCACAGAGATGTAAGGCAAGTAATGTATTGTTAGACAGTGAGTTAAATGCCAAGTTGGG  
GGATTTTGGCTTAGCAAGATTGTATGATCATGGGAGCGATCCGCTCACTACACACGTAAT  
TGGAAGTGTAGGATATCTTGCCCTGAACAACTAGAACTGGAAAGGGTACAACATGCA  
GTGATGTATATGCTTTTGGTGCATTTTTGCTTGAAGTGGCTTGTGGGAGAAGGCCAATAG  
ATCCACGAGTATCGGACGAGAACATAGTTTTGGTTGACTATGTATTTTCTTGTGGGCTA  
AAGGTGATATTCTTGAAGCCATTGATCAAAATTTGGGAAGTGATTATGTTAAAGAAGAGG  
TTGAGTTGGTATTA A AACTTGGATTAGTTTGTTTACAGACACAACCAACAGCTAGACCAA  
GTATGAGGCAAGTGTGCTATATTTAGAAGATGATCTGCCTTTGCCAGAAATATCACTGA  
TGCAAACCTTCAAGTACAAGCTTAACTTAGCAGGGTTTGATCATTTTCCATTGT CATATCC  
AACTTCTGCTGATCAGCCACTTTCTTGGCCTACTTCTGTTACAAACTCCATTCTCTCCAAC  
GGTCGATGA

---

>NbS00029393g0102.1 GenBank ID: KT225304  
MFFNLVILVAFFLVDFAPTSCEVDGFIYNGFQSRNISLDGIAEFTSTGLLLLLTNSNTQDQGHAF  
YPNPIHFKNPNNGTAFSFTTFVFAIRSDYGNLSGHGLVAVITPKRGVEGAFPSHHLGLFNST  
NNGNSSNHVVGVEFDTIISKEFNDINDNHVGDINDGLDSVAVQPAGYFDETGLFHNLTLISGQP  
MQVWVDYDGYTPHINVTLAPLYVTKPVMPLLVLYKYDLSTILDQTMVYVGFSSSTGSVPTHHYIL  
GWSFKTNGKAEELSQPLNLPRLGRKEKSRFLTGLPIISLVSLVIATSVVVYIIRKKKFEELL  
DDWELDYRQFRYKDLTYATKGFREKELLVGGVGGFKVYKGVMPISKLVIAVKKISQESQQG  
MKEFVAEIVSIGRIQHRNLVPLLGYCRRKGELLVYEMPNGSVDKYLFQDPRFTLDWNQRF  
RVIRGVASGLFFLHEECDHVVVHRDIKASNVLDDGELNGLRGLDFGLARLYGHGTDQPQSTRVV  
GTLGYLAPEYARTGRATPSSDVFSFGAFLELVACGRRPIEPRQDSDDLILVDWVFFCWNRG  
NILQVVDPNIGIDFVQGVQVELVLKLGLLCSHSEPSFRPTMRQILLFLDGVVALPELSALGISSA  
GLTFDHRDGFDDFVKSYPSSLGNAHSRGLSVTDSLLSEGR

>NbS00029393g0102.1 GenBank ID: KT225304  
ATGTTTTCAATCTTGTCATACTAGTGGCTTTCTTCTTAGTTGATTTTGCACCAACTTCTTG  
TGAAGTTGATGGATTCATTTACAATGGATTCCAATCAAGGAATATTAGCTTGGATGGCATA  
GCTGAATTCACATCAACTGGCCTTTTGTCTATTAACAAATTCTAACACACAAGATCAAGGC  
CATGCTTTTTATCCAAATCCAATTCATTTCAAGAATTCACCAAATGGTACTGCATTTTCTTT  
CTCCACAACCTTTTGTGTTTGCACATAAGGTCTGATTATGGAAATTTGAGTGGTCATGGACT  
GGTTTTCGTTATCACGCCAAAAGAGGAGTTGAGGGGGCTTTTCTAGCCACCATCTTG  
GCCTTTTTAACTCAACCAATAATGGAAATAGTTCAAACCATGTTGTTGGAGTTGAATTTGA  
TACAATCATAAGCAAGGAATTCATGACATAAATGACAATCATGTTGGAATTGATATCAAT  
GGATTGGATTCTGTAGCAGTTCAACCAGCAGGTTATTTTATGAAACTGGTTTGTTCATA  
ACTTGACTCTTATTAGTGGCCAGCCAATGCAAGTTTGGGTGGATTATGATGGCTACACTC  
CGCATATTAATGTAACATTAGCTCCATTATATGTGACAAAACCAGTTATGCCACTCTTGGT  
TTTGAAGTATGATCTTTCAACAATTCTTGATCAGACTATGTATGTTGGTTTTTCATCATCAA  
CTGGTTCAGTCCCAACACATCATTATATCTTGGGATGGAGTTTCAAGACAAATGGAAAAG  
CTGAAGAACTTTCTCAACTTCCAATCTTCTCGTCTCGGGCGCAAAGAGAAATCAAGAT  
TTTTAACAACTGGTTTGCCAATAATCTTTGGTATCTTTAGTTATAGCAACCTCAGTAGT  
GGTGTATTACATAAGAAGGAAGAAGAAATTCGAAGAACTTCTTGATGATTGGGAACCTGA  
CTATAGACCACAAAGGTTCAAGTATAAAGATTTGTACACTGCTACTAAGGGATTGAGAGA  
AAAGGAACCTATTGGGAGTTGGAGGATTTGGTAAAGTTTACAAAGGAGTATGCCTATTTT  
GAACTTGTGATAGCAGTAAAGAAGATATCTCAAGAATCACAAACAAGGAATGAAGGAATT  
TGTTGCAGAGATTGTAAGCATCGGTCGTATACAACACAGGAATTTAGTACCACTTTTAGG  
ATATTGCAGGAGAAAAGGAGAGTTGCTTTTGGTTTATGAATACATGCCTAATGGAAGTGT  
AGACAAGTACTTATTTGATCAACCAAGATTTACCTCGATTGGAACCAACGGTTTCAAGT  
CATTAGAGCGTTGCATCAGGACTGTTCTTCTCACGGAAGAATGTGACCACGTAGTTGT  
TCATCGAGATTAAGGCTAGTAATGTCTTGTGGATGGTGAACCTAAATGGAAGATTAGG  
AGACTTTGGCCTCGCGAGGCTATATGGTCATGGAACCGATCCTCAGTCTACTCGCGTCTG  
TCGGTACTCTTGGTTACCTTGCACCAGAGTATGCTAGAACTGGTAGAGCAACACCTAGTA  
GTGATGATTTTTCTTTTGGTGCTTTTTTGTCTGAAGTTGCCTGTGGTAGGAGGCCGATAG  
AGCCAAGACAAGACAGTATGATCTGATTTTGGTTCGATTGGGTGTTCTTTTGTGGAATA  
GAGGTAATATTCTTCAAGTTGTTGATCCAAACATAGGCATTGATTTTGTCAAGGGCAAG  
TGGAGTTGGTCTTAAAGTTAGGCTTGTGCTCTCATTGAGAGCCTTCGTTTAGGCCAA  
CCATGCGACAAATCTTGTGTTCTTGGATGGTGTGTTGGCATTACCAGAGTTATCAGCAC  
TCGGCATTTCATCAGCTGGCCTAACATTTGATCATCGTGATGGTTTTGATGATTTTGTCAA  
GTCATATCCGTCATCTTTGGGTAATGCACATTCGCGGGTCTATCAGTAACTGACTCTCT  
TCTCTCTGAAGGCCGATGA

---

>NbS00010453g0003.1  
MDKPYCLVILAFICTILVRAHSFDLYNGFNKSDIMTDGVAYINPSGALKLTNRSYHVIGHAFH  
PKPIPFNSSTNSTAKNASSFSTNFVFAIVPLKNTPGGFGFAFTLSPSPSFGAQQGDHFLGVL  
NSKNDGNATNHIFLVEFDTVNGHNEGVDKDGNIHIGININGMRSIASNSADYHINDTSETEQIY  
LQGGDRIQAWIDYDGVKVVNVTVAPISIPKPIQPLISESIDLSPVMKETMYAGFSAATGDKAS  
SHYILGWSFRLNGAADPLNPSELPTAPPEVVTSSKNSHLKKALIAAISSMVFLIIVASVIVYIRR  
MVQHEVLEDWELDCPHRFYRDLKAAKGFVSELIGVGGFGAVYKILPTNGAEVAVKRIA  
SNSLQGMREFAAEIESLGRRLRHKHLVNLQGWCKTKNDLLLVDYIPNGSLDSSLYRPNKNDIVL  
AWDRRFNIIKIAAGLLYLHEEWEQVVIHRDVKSSNVLIDGEMNGKLGDFGLARLYDHGKNS  
HTTNVVGITIGYIAPELSRTGKASTSDIYAYGVLLLEVASGRPPYIYEPGQALVLADWVIECL  
QLGNILDAVDPKLNAYVDKEVRMGALVLADWVIECLQLGNILDAVDPRLNSAYVDKEVKMIL

GLLLCSHRPEARPTMRQVMRYLNGDESLQISEQLSSVSGSRVDEITSKFLDVFASDTISIS  
RRTFSIGQMSSSSLNAGR

>NbS00010453g0003.1 Corrected; GenBank ID: KT225305  
MDKPYCLVILAFICTILVRAHSFDLYNGFNKSDIMTDGVAYINPSGALKLTNRSYHVIGHAFH  
PKPIPFNSSTNSTAKNASSFSTNFVFAIVPLKNTPGGGFGAFTLSPSPSFPGAQGDHFLGVL  
NSKNDGNATNHIFLVEFDTVNGHNEGVDKDGNIHIGININGMRSIASNSADYHINDTSETEQIY  
LQGGDRIQAWIDYDGVKVVNVTVAPISIPKPIQPLISESIDLSPVMKETMYAGFSAATGDKAS  
SHYILGWSFRLNGAADPLNPSELPTAPPEVVTSSKNSHLKALIAAISSMVFLIIVASVIVYIRRR  
MVQHEVLEDWELDCPHRFYRDLYKAAKGFKVSELIQVGGFGAVYKGILPTNGAEVAVKRIA  
SNSLQGMREFAAEIESLGRRLRHKHLVNLQGWCKTKNDLLLVDYIPNGSLDSLRYRPNKNDIVL  
AWDRRFNIIKGIAAGLLYLHEEWEQVVIHRDVKSSNVLIDGEMNGKLGDFGLARLYDHGKHS  
HTTNVVGITIGYLAPELSRTGKASTSDIYAYGVLLLEVASGRPPIIYEPGQALVLADWVIECL  
QLGNILDAVDPKLNAYVDKEVRMVLGLLLCSHRPEARPTMRQVMRYLNGDESLQISEQ  
LSSVSGSRVDEITSKFLDVFASDTISISRRTFSIGQMSSSSLNAGR

>NbS00010453g0003.1 Corrected; GenBank ID: KT225305  
ATGGACAAGCCCTATTGCCTTGTATTATTCTTGCATTCAATTTGCACTATTCTTGTAAAGAG  
CTCATTCTTTTATTCTTTATAATGGATTCAATAAGTCAGATATCATGACTGATGGAGTT  
GCATATATCAATCCTAGTGGTGCCTTAAGCTTACTAATAGATCATACCATGTTATAGGAC  
ATGCTTTCCATCCCAAACCTATAACATTTTTCAACTCTAGTACTAATTCCACTGCTAAAAAT  
GCTTCTTCATTTAGTACAACTTTGTCTTCGCCATTGTCCCTCTTAAGAACAACCTCCAGGTG  
GCTTTGGCTTTGCTTTACCTTATCTCCATCCCCGAGTTTTCTTGGTGTCAAGGCGATC  
ACTTTCTTGGAGTCTCAATTCAAAGAACGATGGCAATGCTACTAACCACATCTTTTTGGT  
CGAATTTGACACTGTGAATGGTCACAATGAAGGTGTGGACAAAGATGGCAACCACATTG  
GAATCAACATCAATGGCATGAGGTCTATCGCATCAAACCTCAGCCGATTACCATATTAATG  
ACACTTCTGAAACAGAACAGATATATCTACAAGGTGGAGACCGGATTCAGGCTTGGATA  
GATTACGATGGAGTAAAGAAAGTGGTAAATGTAAGTGTGGCTCCAATATCAATCCAAAG  
CCAATCAACCTCTAATTTCTGAGTCCATAGACTTGTCCCAGTGATGAAGGAAACTATG  
TATGCTGGTTTCTCAGCAGCCACAGGAGATAAAGCAAGCTCTCATTACATCTTGGGTTGG  
AGTTTTCGGTTGAATGGAGCTGCTGATCCATTAATCCCTCTGAGCTACCTACTGCCCA  
CCTGAAGTGGTAACATCCTCCAAGAATTCATCTTAAAAGGCCTTGATCGCAGCAATT  
TCCTCCATGGTTTTCTGATCATTGTGGCATCAGTAATTGTTTATATCCGCAGAAGAATG  
GTGCAACATGAAGTCTAGAGGATTGGGAGCTGGATTGTCTCACAGGTTGAGATACAG  
AGATCTTTACAAGGCAGCCAAGGGATTCAAGGTGAGCGAATAATTGGAGTTGGAGGCT  
TCGGTGTCTTTACAAAGGTATCTTCCCATAATGGAGCTGAGGTTGAGGTTGAGGTTGAGG  
ATAGCAAGCAATCTCTCAGGGAATGAGAGAATTTGCTGCGGAGATTGAAAGCTTAGG  
CAGGTTAAGGCACAAACACTTGGTCAACCTTCAAGGCTGGTGTAAAGACAAAGAATGATCT  
TCTCCTAGTGTATGACTATATCCCAAATGGAAGTCTTGATTCACTTTATAGACCAAAA  
AATGACATTGTTCTAGCATGGGACCGGAGATTTAACATCATCAAAGGGATTGCTGCAGG  
GCTTCTTTACTTGCACGAAGAATGGGAGCAAGTGGTAATACATCGAGACGTGAAGAGCA  
GTAACGTCCTTATTGATGGTGAATGAATGGTAAATTAGGGGATTTGGGCTTGAAGAT  
TATATGATCATGGCAAGCATTACACACAACAATGTTGTAGGAACAATAGGGTACCTTG  
CACCCGAATTATCACGAACAGGGAAGGCCTCAACGAGCACAGATATTTATGCGTATGGT  
GTACTACTTCTTGAAGTAGCTAGTGAAGACCACCTATTATCTATGAACCAGGGCAAGGA  
GCTCTGGTACTAGCAGATTGGGTGATAGAATGTCTTCAACTAGGTAATATTCTTGATGCA  
GTTGATCCTAAGTTGAATTCTGCCTATGTCGATAAAGAGGTGAGAATGGTTTTGGGACTT  
GGGCTTCTTTGTTCTCACCAAGACCAGAAGCTAGGCCAACCATGAGACAAGTAATGAG  
GTACCTCAATGGAGATGAATCGCTTCAAATTTCTGAGCAATTGAGCTCTGTTGGATCGGG  
CAGGGTTGATGAAATCACATCCAAGTTCTTAGATGTGTTTGCTAGTGATACAATCAGTATA  
TCACGACGTACATTTCCATCGGACAGATGTCATCTAGTTCCCTAATGCTGGTAGATAG

>NbS00005128g0014.1  
MDKPYCLVILVFFYITILVRAHSFGFIYNGFNKSDIMTDGVAYINPSGALKLTNRSYHVIGHAFH  
PKPIPIFNSSTNSTAKNASSFSTNFVFAIVPLKNTPGGGFGAFTLSPSPSFPGAQGDHFLGVLN  
STNDGNDTNHIFLVEFDTVNGYNEGVDTDGNIHIGININGMKSIA SQPAYYYVNDTSKTEEVNL  
EREESIQAWVDYDGVNKKVVNVTVSPKSIPKPIQPLISKSIDLSSVMKETMYAGFSAATGDKAS  
SHYILGWSFRLNGAADPLNPSELPTAPPEVVS ELI QVGGFGAVYKGILPTNGAEVSELIGVGG  
FGAVYKGILPTNGAEVAVKRIASNSLQGMREFAAEIESLGRRLRHKHLVNLQGWCKTKNDLLL  
VYDYIPNGSLDSLRYRPNKNDIVLAWDRRFNIVPNGSLDSLRYRPNKNDIVLAWDRRFNIIKGIAA

GLLYLHEEWDQVVIHRDVKSSNVLIDGEMNGKLGDFGLARLYDHGKHSHTTNVVGITIGYLAP  
ELSRGTGKASTSTDVYAYGVLLLEVASGRPPIIYEPGQGALVLADWVIECLQLGNILDAVDPRL  
NSAYVDKEVKMILGLLLCSHPRPEARPTMRQVMKYLNGDESLQISEQLSSVGSGRVDEITS  
KFLEVFASDTINISRHTFSIGQMSSSSSLNADRSSISGAFII

>NbS00005128g0014.1 Corrected; GenBank ID: KT225306  
MDKPYCLVILVFFYITILVRAHSFGFIYNGFNKSDIMTDGVAYINPSGALKLTNRSYHVIGHAFH  
PKPIPIFNSSTNSTAKNASSFSTNFVFAIVPLKNTPGGFGFAFTLSPSPSFPGAQGDHFLGLVNL  
STNDGNDTNHIFLVEFDTVNGYNEGVDTDGNHIGININGMKSIA SQPAYYYVNDTSKTEEVNL  
EREESIQA WVDYDGVNKKVVNTVSPKSIPKPIQLISKSIDLSSVMKETMYAGFSAATGDKAS  
SHYILGWSFRLNGAADPLNPSELPTAPPEVVTSSKNSYLKALIAAFSSTVFLIIVSVIVHIRR  
RMVQHEVLEDWELDCPHRFYRDLYKATRGFKVSELIGVGGFGAVYKGIPTNGAEVAVKRI  
ASNSLQGMREFAAEIESLGRRLRHKHLVNLQGWCKTKNDLLLVDYDVPNGSLD SLLYRPKNDI  
VLAWDRRFNIIKGIAGLLYLHEEWDQVVIHRDVKSSNVLIDGEMNGKLGDFGLARLYDHGK  
HSHTTNVVGITIGYLAP ELSRGTGKASTSTDVYAYGVLLLEVASGRPPIIYEPGQGALVLADWVI  
ECLQLGNILDAVDPRLNSAYVDKEVKMILGLLLCSHPRPEARPTMRQVMKYLNGDESLQIS  
EQLSSVGSGRVDEITSKFLEVFASDTINISRHTFSIGQMSSSSSLNAGR

>NbS00005128g0014.1 Corrected; GenBank ID: KT225306  
ATGGACAAGCCCTATTGCCTTGTTATTCTTGTATTCTTTTACACTATTCTTGTAAAGAGCTC  
ATTCTTTTGGTTTTATTTACAATGGATTCAATAAGTCGGATATCATGACTGATGGAGTTGC  
ATATATCAATCCTAGTGGTGC ACTTAAGCTTACCAATAGATCATACCATGTTATAGGCCAT  
GCTTTCCACCCCAAACCTATACCAATTTTCAACTCTAGTACTAATTCCACTGCTAAAAATG  
CTTCTTCATTTAGTACAAACTTCGTCTTCGCCATTGTCCCTCTTAAGAACACTCCAGGTGG  
CTTTGGCTTTGCTTTACCTTATCTCCATCCCCGAGTTTTCTGGTGCTCAGGGCGATCA  
CTTTCTGGAGTCTCAATCAACGAACGATGGCAATGATACTAACCACATCTTTTTGGTT  
GAATTTGACACAGTGAATGGCTACAATGAAGGTGTGGACACAGATGGCAATCACATTGG  
AATCAACATCAATGGCATGAAGTCTATCGCATACAACCAGCCTATTACTATGTCAATGA  
CACTTCTAAAACAGAGGAGGTAATCTAGAAAGAGAAGAATCAATTCAGGCTTGGGTAGA  
TTATGATGGAGTAAACAAAGTGGTAAATGTAACAGTATCCCCCAAATCAATTCCAAAGCC  
AATCAACCTCTAATCTCTAAGTCCATAGACTTGTCTCAGTGAAGGAACTATGTAT  
GCTGGCTTCTCAGCAGCCACAGGAGATAAAGCAAGCTCGCATTACATCTTGGGTTGGAG  
TTTTCGGTTGAATGGAGCTGCTGATCCATTAATCCCTCTGAGCTACCTACTGCCCCACC  
TGAAGTGGTAACATCCTCCAAGAATTCCTATCTTAAAAGGCCTTGATCGCAGCATTTTC  
CTCCACGGTTTTCTGATCATTGTGGTATCAGTAATTGTTTCATATCCGCAGAAGAATGGT  
GCAACATCAAGGTTCTAGAGGATTGGGAGTGGATTGCTCCTCACAGGTTTAGATACCGAG  
ATCTTTACAAGGCAACCAGGGGATTCAAGGTCAGTGA ACTAATTGGAGTTGGAGGCTTT  
GGTGCTGTTTACAAGGGTATTTTGCCTACTAATGGAGCTGAGGTTGCAGTGAAGAGGAT  
AGCGAGCAATTCTCTTCAAGGAATGAGAGAATTTGCAGCGGAGATTGAAAGCTTAGGCA  
GGTTAAGGCACAAACACTTGGTCAACCTTCAAGGCTGGTGTAAAGACAAAGAATGATCTTC  
TCCTAGTGTATGACTATGTCCCAAATGGAAGTCTTGATTCTGTTACTTTATAGACCGAAAAA  
CGACATTGTTCTAGCATGGGACCGGAGATTTAACATCATTAAAGGGATTGCTGCAGGGC  
TTCTTTACTTGCACGAAGAATGGGATCAAGTGGTAATACATCGAGACGTGAAGAGCAGTA  
ACGTCCTTATTGATGGTGAATGAATGGTAAATTAGGGGATTTTGGGCTTGAAGATTAT  
ATGATCATGGCAAGCATTACACACAACAAATGTTGTAGGAACAATAGGGTACCTTGCAC  
CCGAATTATCACGAACAGGGAAGGCCTCAACGAGCACAGATGTTTATGCATATGGGGTA  
CTACTACTTGAAGTAGCTAGTGGGAGACCACCTATTATCTATGAACCAGGGCAAGGAGC  
TCTGTTCTAGCAGATTGGGTTATAGAATGTCTTCAACTAGGTAATATTCTTGATGCAGTT  
GATCCTAGGTTGAATTCTGCCTATGTGATAAAGAGGTGAAAATGATTTTGGGACTTGGG  
CTTCTTTGTTCTCACCAAGACCAGAAGCTAGGCCAACCATGAGACAAGTAATGAAGTAC  
CTCAATGGAGATGAATCGCTTCAAATTTCTGAGCAGTTGAGCTCTGTTGGGTGCGGGCAG  
GGTTGATGAAATCACATCCAAGTTCTTGAAGTGTGTTGCTAGTGATAACAATCAATATATCA  
CGCCATACATTTTCCATCGGACAGATGTCATCTAGTTCCTAAATGCTGGTAGATAG

>NbS00024573g0008.1  
MNQALETLLLYLLITIIIFSSVQSVSAIDFVFNKPSDLSLFGIATIESGILTLTNDSTFSIGRALH  
PPKIVTKAPNSAQVLPFSTSFIFAMAPFKDRLPGHGIVFLVFPQTGIDGTTSSQNLGFLNFTNN  
GNPDNHVFGVEFDVFNKQEFNDINDNHVGDVNSLASVFAHEAGYWPDKYSKFSDDGNLNE  
ESFETLKLNNGRNYQWIDYADFQINVFKEEMYVGF TASTGDLAQVSLFLIKRNRMRKRERE  
EMEDWELEYWPHRISYQEIDAATKGFADENVIGGNGKVYKGVLAGSSEVAVKRISHESSE

GARQFLAEISSLGRKLRNLVSLRGWCKKDRHSLILVYDYMENGLDKRLFECDETNMLSFE  
DRIRILKDVASGVLYLHEGWAEKVLHRDIKASNVLLDKDMNARLGDFGLARMHDHGQVANTT  
RVVGTGVLAPFVKTGRASQTDFVGYGVLVLEVMCGRRPIEDGKPLLDWLWELMRR  
GECDVWKEAYRGRRRAPFIGLAVGTNETRQID

>NbS00024573g0008.1 Corrected; GenBank ID: KT225307  
MNQALETLLLYLLITIFSSVQSVSAIDFVFNFGFKPSDLSLFGIATIESGILTLTNDSTFSIGRALH  
PPKIVTKAPNSAQVLPFSTSFIFAMAPFKDRLPGHGIVFLFVPQTGIDGTTSSQNLGFLNFTNN  
GNPDNHVFGVEFDVFKNQEFNDINDNHVGDVNSLASVFAHEAGYWPDKYSKFSDDGNLNE  
ESFETLKLNNGRNYQVWIDYADFQINVTTAPVGMKRPKQPLLDPLNLSQVFKEEMYVGF  
STGDLAQGHKILAWSFSNSNFRISDALITQGLPSFELPKDPVHRKSGFIAGMTVSLFLVVVTV  
VVSLFLIKRNRMREREEMEDWELEYWPHRISYQEIDAATKGFADENVIGGNGKVYKGV  
LTGSLEVAVKRISHESSEGARQFLAEISSLGRKLRNLVSLRGWCKKDRHSLILVYDYMENGL  
SLDKRLFECDETNMLSFEDRIRILKDVASGVLYLHEGWAEKVLHRDIKASNVLLDKDMNARLG  
DFGLARMHDHGQVANTTRVGTGVLAPFVKTGRASQTDFVGYGVLVLEVMCGRRPIE  
DGKPLLDWLWELMRRGELINAFDRRLRSTQDFNEEEALRVLQLGMICASMDPKARPTMRQ  
VVKFFERNSEADESEAEDMDVYLLETLSRNTMLSNFSLSLSHGSHPTFEEIREGLSSSMSIS  
WTNSLVDGR

>NbS00024573g0008.1 Corrected; GenBank ID: KT225307  
ATGAACCAAGCCCTAGAACTCTTCTTCTACCTGCTGATAACCATAATATTTTCTAGTG  
TTCAATCAGTTTCAGCTATTGATTTTGTGTTAATGGCTTTAAACCATCAGATTTATCACTG  
TTTGGGATTGCTACAATTGAATCTGGAATACTTACTTTACAAATGACTCAACTTTCTCAA  
TTGGCAGGGCTCTACACCCTCAAAGATTGTCACAAAAGCACCAAATTCAGCACAAAGTTC  
TTCCCTTTTCAACATCTTTTCAATTTTGAATGGCTCCTTTTAAAGGATAGGCTACCAGGACA  
TGGCATAGTTTTCTTGTGTTGTGCCACAAACAGGTATCGATGGTACTACTTCTTACAAAAT  
TTAGGCTTTTTGAACCTTACAAATAATGGGAATCCTGATAATCATGTTTTTGGGGTTGAAT  
TTGATGTGTTCAAGAATCAAGAATCAATGACATAAATGACAACCATGTTGGAATTGATGT  
TAATTCTCTTGCATCAGTGTGTTGCTCATGAAGCAGGCTATTGGCCTGATAAGTACAGCAA  
GTTTAGCGATGATGGTAACTTAAATGAAGAGTCTTTTCGAGACTTTAAAGTTGAATAATGGA  
AGAAATTACCAAGTTTGGATTGACTATGCAGATTTTCAGATTAATGTGACTACGGCACCA  
GTTGGTATGAAAAGGCCTAAGCAACCTTTGTTGGATTTTCCCCTCAATCTTTCTCAGGTTT  
TTAAGGAAGAGATGTATGTGGGGTTCCTGATCCACTGGAGATCTTGCTCAAGGTCAC  
AAAATTTTAGCTTGGAGTTTAGTAACCTCGAATTTTCGGATAAGTGATGCTTTAATCACAC  
AGGGTTTGCCTTCAATTTGAGCTGCCTAAAGATCCAGTTCATCGATCAAAGGGTTCATTG  
CAGGTATGACAGTGTCACTCTTGTGTTCTTGTGTTGTTGTTGTTGTTGTTGTTGTTGTTG  
GATTAAGAGAAATAGGAGAATGAAAAGGGAAAGAGAGAAATGGAAGATTGGGAATTGG  
AATATTGGCCACATAGGATAAGTTATCAGGAAATTGATGCTGCCACAAAGGGTTTTGCTG  
ATGAAAATGTGATTGGAATTGGAGGTAATGGGAAGGTATATAAAGGTGTTTTGACTGGGA  
GTTTAGAGGTTGCAGTAAAGCGCATTCTCATGAAAGCAGTGAAGGGGCAAGACAATTC  
TTGGCTGAGATTTCAAGTCTCGGTAGGCTAAAGCACAGAAATTTGGTGTCACTAAGAGG  
CTGGTGCAAGAAAGACCGACACAGCTTGAATTTGGTTTATGATTATATGGAAAATGGGAG  
TTTGGATAAAAGGCTGTTTGAATGTGATGAGACGAACATGTTGAGTTTTGAAGATAGAAT  
TAGGATTTTGAAGATGTGGCATCAGGAGTTCTATACTTGCATGAGGGATGGGAGGCAA  
AAGTGTACATAGGGACATTAAGGCTAGCAATGTTTTACTTACAAGGACATGAATGCAA  
GACTAGGTGATTTTGGTCTAGCCAGAATGCATGATCATGGTCAAGTGGCTAACACGACT  
CGAGTTGTTGGCACAGTAGGTTACCTGGCACCAGAGTTTGTCAAGACTGGTCTGTCCTC  
TACACAACTGATGTGTTTGGATATGGAGTTTTAGTTTTGGAGGTGATGTGTGGAAGGAG  
GCCTATAGAGGAGGATGGCAAGCCCCCTTTATTGGATTGGCTGTGGGAACATAATGAGAC  
GAGGCGAATTGATTAATGCCTTTGACCGTTCGATTAAGGACGAGTCAAGATTTCAATGAAG  
AGGAAGCATTAAAGAGTATTGCAATTAGGCATGATATGCGCGAGCATGGACCCCAAAGCT  
AGGCCAACTATGAGACAAGTAGTGAAATCTTTGAAAGGAACAGTGAGGCTGATGAATCT  
GAAGCTGAGGATATGGATGTTTACCTTCTGGAGACTTTGAGATCCAATACCATGTTGTCC  
AATTTTTCTTGGATTTGAGCCATGGTTCACACCCAACATTTGAAGAAATTAGAGAAGGTT  
TGCTTCTTCCATGTCCATTTCTTGGACAAATCTTTGGTGGATGGTAGGTGA

---

>NbS00025337g0001.1 GenBank ID: KT225308  
MNLKTLLLYLLITIFSCIQSVSAIDFVFNFGFKSSDISLFGIATIESRILTLTNDSTFSIGRALHPSKIV  
TKAPNSSQVLPFSTSFIFAMAPFKDRLPGHGIVFLFVPQTGIDGTTSSQNLGFLNFTNNGNPD  
NHVFGVEFDVFKNQEFNDINDNHVGDVNSLASVFDHEAGYWPDKYNKFSDDGSLNEESFE



WELMKRGELSNAFDNQLKSNKGFNEEEALRVLQLGMICASLDPTRPTARQVVKFFERNSD  
GAESEADMDAYLLES MRHNTMLTNYCSSMPISWTNSLVEGR

>NbS00032834g0007.1 Corrected; GenBank ID: KT225309  
MKQYLKTLLEYLLITLSSIQSASATDFVFNFSKPSDISAYGDATIESGILSLTLDVAYFSDGRAL  
HPSKIVTKAPNSSQVLPFSTSFIFAMAPYRDLRPGHGMVFLFVPHTTGMSSSSSQNLGFLNF  
TNNGNPDNHVFGVEFDVFRNQEFNDINNNHVGDVNSLESVFEVHEAGYWPDKYNKYNDNG  
SLNEEFETLKLNNKNYQVWIDYADFHINVTMAPVGMKRPKQPLDFPLNLSQVFKDEMYV  
GFTASTGMLAQGHKILAWSFSNSNFSISDALITQGLPSFELPKDLIYRSKGFIVGMTMSLFFLV  
VVTSVASFLIKRNRRLKREKEGIEDWELEYWPHRITYQEIDAATKGFADIVIGVGGNGKVY  
KGVLAGGSEVAVKRM SHDNCEGERQFLSEISSLGR LKHRNLVALRGWCKKGGGSLIVVYDY  
MENGLDKKLFECDKGNMLSFEDRIKILKDVASGVLYLHEGW EAKVLHRDIKASNVLDDKEM  
HARIGDFGLARMHDHGQVAKETRVVGTVGYLAPEFAKTGRASTQTDLFSYGV LILEVMCGR  
RPIEEGKPPLVDWLWELMKRGELSNAFDNQLKSNKGFNEEEALRVLQLGMICASLDPTRPT  
TARQVVKFFERNSDGAESEADMDAYLLES MRHNTMLTNYCSSMPISWTNSLVEGR

>NbS00032834g0007.1 Corrected; GenBank ID: KT225309  
ATGAAGCAATACCTAAAACTCTTCTTCTCTACCTGCTAATAACCATACTTTCTAGTATTCA  
ATCAGCTTCAGCAACTGATTTTGTCTTCAATAGCTTTAAACCATCAGATATATCAGCATAT  
GGAGATGCTACAATTGAATCTGGAATACTTAGTCTTACCCTTGATGTAGCTTACTTTTCAG  
ATGGTAGAGCTCTACACCCTTCAAAAATTGCTACTAAAGCACCCAATTCATCTCAAGTTCT  
TCCCTTTTCAACATCTTTCATTTTTGCTATGGCGCCTTATAGGGACAGGCTACCAGGACA  
TGGCATGGTTTTCTTGTGTTGTGCCACACACCACAGGTATGTCGAGTTCTTCTTCACAGAA  
TTTAGGTTTTCTTGAACCTCACAAATAATGGGAATCCCGATAACCATGTCTTTGGGGTTGA  
GTTTGATGTTTTCAGGAATCAAGAATCAATGACATAAATAACAACCATGTTGGAATTGAT  
GTCAATTCTCTTGAATCAGTGTGTTGTTGATGAAGCAGGCTATTGCCTGATAAGTACAATA  
AGTATAATGATAATGGTAGCCTAAATGAAGAATATTTTCGAGACTTTAAAGTTGAATAATGG  
AAAAACTACCAAGTTTGGATTGACTATGCAGATTTCCACATTAATGTTACTATGGCACCA  
GTTGGTATGAAAAGGCCTAAGCAACCTTTGTTGGATTTCCCTCTGAATCTTTCTCAAGTTT  
TTAAGGATGAGATGTATGTGGGGTTCACAGCCTCCACTGGAATGCTTGCTCAAGGTCAC  
AAGATTTTAGCTTGGAGTTTTAGTAACTCTAATTTTTCGATTAGTGATGCTTTGATCACAC  
AAGTTTTGCCGTTAGAATTATGATTCGACTAAACACAATAGCCTTCATATCGAATAATT  
TGGAATAACAACATGAACGGAAGCATACTGAATCCATATGTGGAATCCTTAAGCCTCC  
TTTTGATGATTGTTGAAAGCTCCTTGATCCTTTCTTCAAGATTGACTTACAAATAATG  
GGAATCCCGATAACCATGTCTTTGGGGTTGAGTTTGTATGTTTTCAGGAATCAAGAATTCA  
ATGACATAAATAACAACCATGTTGGAATTGATGTCAATCTCTTGAATCAGTGTGTTGTTCA  
TGAAGCAGGCTATTGGCCTGATAAGTACAATAAGTATAATGATAATGGTAGCCTAAATG  
AGAATATTTTCGAGACTTTAAAGTTGAATAATGGAAAAACTACCAAGTTTGGATTGACTAT  
GCAGATTTCCACATTAATGTTACTATGGCACCAGTTGGTATGAAAAGGCCTAAGCAACCT  
TTGTTGGATTTCCCTCTGAATCTTTCTCAAGTTTTTAAGGATGAGATGTATGTTGGGTTCA  
CAGCCTCCACTGGAATGCTTGCTCAAGGTCACAAGATTTTAGCTTGGAGTTTTAGTAACT  
CTAATTTTTCGATTAGTGATGCTTTGATCACACAAGGTTTGCCTTCATTTGAGCTTCCTAA  
AGATCTAATTTATCGATCGAAGGGGTTTATTGTAGGTATGACAATGCTACTTTTTCTTTCTT  
GTTGTGGTCACTTCTGTAGCTTCATTATTTCTGATTAAGAGAAATAGGAGACTAAAAAGG  
GAAAAAGAGGTATAGAAGCTTGGGAATTGGAATATTGGCCACATAGGATTACTTATCAAG  
AAATGATGCTGCAACAAAGGGTTTTGCTGATGAAATTGTGATTGGAGTTGGAGGTAATGG  
GAAGTTTTATAAAGGGGTTTTGGCTGGGGGTTGAGAGTTGCAGTAAAGCGCATGTCTC  
ATGACAACCTGTGAAGGGGAAAGGCAATTCTTGAGTGAGATTTCAAGTCTTGGTAGGCTAA  
AGCACAGAAATTTGGTGGCATTAAAGAGGCTGGTGCAAGAAAGGTGGAGGCAGCCTGATT  
GTGGTTTATGATTATATGAAAATGGGAGCTTGGATAAAAAGCTGTTTGAATGTGATAAG  
GAAAACATGTTGAGTTTTGAAGACAGAATTAAGATTTTGAAGATGTGGCATCAGGGGTT  
TTACTTGCATGAGGGGTGGGAGGCAAAAGTGTTCATAGGGACATTAAGGCTAGCAA  
TGTTTTACTTGACAAGGAAATGCATGCAAGAATTGGTGATTTTGGTCTAGCAAGAATGCA  
TGATCATGGTCAAGTGGCTAAGGAGACTCGAGTTGTTGGCACAGTTGGTTACCTGGCGC  
CAGAGTTTGCCAAGACAGGCCGTGCCTCCACGCAAACCTGATTTGTTGAGTTATGGAGTT  
CTAATATTGGAGGTGATGTGTGGAAGGAGGCCAATAGAGGAAGGCAAGCCACCTTTAGT  
GGATTGGCTGTGGGAATAATGAAACGAGGCGAATTGAGTAATGCCTTTGATAATCAATT  
AAAGAGTAATAAAGGATTTAATGAAGAGGAGGCCCTTAAGGGTATTGCAATTAGGCATGAT  
ATGCGCGAGCCTAGACCCAGAACTAGGCCAACC GCGAGACAAGTGGTGAATTTCTTTG  
AAAGAACTCTGATGGAGCTGAATCTGAAGCTGAAGATATGGATGCTTACCTTCTGAAA

GTATGAGACATAATACCATGTTGACCAATTATTGTTCTTCCATGCCTATTTCTTGGACAAA  
TTCTCTAGTGGAGGGTAGGTGA

>NbS00026087g0010.1

MKSIPTYSNILVWFILLFCFCCSNKSAFAITEFDGTLTSLNLKLLGDAHLGDNNSVQLTRDLA  
VPNSGAGKALYSEPVFRQPDLPASFSSTFFSFSVTNLNPSSIGGGLAFVLTNPDESIGDA  
GGYIGILDSKGTQSGTISVEFDLMDVEFNINDINGNHVGLDLNSMVSTQVSDLDSIGVDLKSGD  
IVNSWIEYSGSTAELNVFVSYSNLKPKPEFLSVVLDIAEYVNDFMFVGFSGSTQGSTIEHSIEW  
WSFSSSFEASPKSAAAAAPPPPTASLMNPAADSVTSWPPSMAPSESNSSASIMQDKSNGK  
CHNNFCKQPGGAVVGVVTASAFFLAFATLVLIWLYTKKFKKVNSEFLASDVIKMPKEFSYKE  
LKLATKAFDLTRIIGHGAFGTVYKILSDNGSIVAVKRCSHSGQGKAEFLSELSIIGTLRHRNLV  
RLQGWCHEKGEILLVYDLMPNGSLDKALFESRMILPWLHRRKILLGVASALAYLHQECENQVI  
HRDIKSSNIMLDEGTSHLLMTLQDSVSDNLNGMITLSTSSSENSFNAGNGMDLV

>NbS00026087g0010.1 Corrected; GenBank ID: KT225310

MKSIPTYSNILVWFILLFCFCCSNKSAFAITEFDGTLTSLNLKLLGDAHLGDNNSVQLTRDLA  
VPNSGAGKALYSEPVFRQPDLPASFSSTFFSFSVTNLNPSSIGGGLAFVLTNPDESIGDA  
GGYIGILDSKGTQSGTISVEFDLMDVEFNINDINGNHVGLDLNSMVSTQVSDLDSIGVDLKSGD  
IVNSWIEYSGSTAELNVFVSYSNLKPKPEFLSVVLDIAEYVNDFMFVGFSGSTQGSTIEHSIEW  
WSFSSSFEASPKSAAAAAPPPPTASLMNPAADSVTSWPPSMAPSESNSSASIMQDKSNGK  
CHNNFCKQPGGAVVGVVTASAFFLAFATLVLIWLYTKKFKKVNSEFLASDVIKMPKEFSYKE  
LKLATKAFDLTRIIGHGAFGTVYKILSDNGSIVAVKRCSHSGQGKAEFLSELSIIGTLRHRNLV  
RLQGWCHEKGEILLVYDLMPNGSLDKALFESRMILPWLHRRKILLGVASALAYLHQECENQVI  
HRDIKSSNIMLDEGFNARLGDFGLARQVEHDKSPDATVAAGTMGYLAPEYLLTGRATEKTDV  
FSYGAVVLEVASGRRPIERETTRVEKVGVNSNLVEVWVWGLHREGNLLMAADSRLCGEFDE  
GEMRRVLMVGLACSQPDPMVRPTMRSVVQMLVGEAEVPIVPRTKPSMSFSTSHLLMTLQD  
SVSDNLNGMITLSTSSSENSFNAGNGMDLV

>NbS00026087g0010.1 Corrected; GenBank ID: KT225310

ATGAAGTCAATTCCTACATATAGCAACATTCTTGATGGTTCATACTATTGTTCTGTTTTG  
CTGTAGTAATAAGTCAGCATTGCTATCACTGAGTTTGATTTTGGAACATTAACACTGAGT  
AATTTGAAGCTTCTTGGAGATGCACATTTGGGTGACAACAACAGTGTTCAGTTAACACGT  
GACCTAGCCGTGCCAAATTCGGCGCCCGGAAAAGCTTTATATTCCGAACCAGTAAGATT  
CCGGCAGCCGGATCTTGATTTCCGGCGAGTTTCTCTACATTCTTTTCATTTTCAGTGAC  
TAATTTGAACCCGTCGCTATTGGTGGTGGTCTTGCTTTTGTACTCACGCCTAATGATGA  
GTCAATAGGTGATGCTGGTGGGTATATTGGAATCTTGGATTCTAAAGGCACACAAAAGT  
GTACAATTTGAGTTGAATTTGACACCCCTTATGGATGTTGAGTTAATGATATTAATGAAA  
TCATGTTGGCTTGGATCTGAATTCATGGTTTCAACTCAAGTTAGTGATTTGATTCTATT  
GGTGTGATCTCAAGAGTGGTGACATAGTCAATTCTTGGATTGAATATTCTGGTTCTACT  
GCAGAGTTGAATGTGTTTGTATCATACTCTAATTTAAAACCAAAGGAACCATTTTGTCTG  
TTGTTTTGGATATTGCTGAATATGTAATGATTTTCATGTTTGTGGGTTTTCTGGTTCAACT  
CAAGGGAGTACTGAGATTCATAGTATTGAGTGGTGGAGTTTTAGTTCATCATTTGAAGCA  
AGTCCTAAGTCGGCGGCCGAGCTGCGCCACCACCGCCAACGGCTAGTTTAATGAATC  
CCGCGGCGGACTCCGTCACGTCGTTGGCCGCTTCTATGGCTCCTCAGAGTCTAATAGT  
AGTGCAAGTATAATGCAAGATAAGAGCAATGGGAAATGTCATAACAATTTTTGTAAACAA  
GGTCCTGGAGCTGTTGTTGGGGTAGTAAGTACTGCTAGTGCATTTTTCTTGCAATTTGCTACA  
TTAGTACTTATTTGTTATACACCAAAAAGTTCAAGAAAGTAAAAAATCTGAATTTTTGG  
CATCTGATGTTATCAAAATGCCTAAAGAGTTTAGCTATAAAGAGCTTAAATTGGCTACAAA  
AGCCTTTGATTTGACGAGGATTATAGGCCACGGTGCATTTGGGACAGTTTACAAGGGCA  
TTTTATCGGACAATGGTAGCATTGTAGCAGTCAAGAGATGTAGTCATAGCGGACAAGGG  
AAGGCGGAGTTCTTATCTGAATTATCTATAAATTGGAACACTTAGGCACAGAAATCTTGTTA  
GACTTCAAGGTTGGTGCCATGAGAAAGGTGAAATTTGTTAGTCTATGATCTAATGCCTA  
ATGGGAGTCTTGATAAGGCATTATTTGAATCAAGAATGATTCTACCTTGGCTACATAGGA  
GAAAATTTTGTAGGTGTTGCTTCAGCCTTGGCATATTTACATCAAGAATGTGAAAATCA  
GGTGATTCATAGGGATATAAAGAGTAGTAACATTATGTTAGATGAAGGGTTCAATGCAAG  
ATTAGGTGATTTTGGATTAGCAAGACAAGTTGAACATGACAAGTCCCCCGATGCAACGGT  
AGCAGCCGGGACAATGGGCTACTTGGCTCCTGAATACTTGTAAACCGGAAGAGCAACCG  
AAAAACTGATTTTTAGCTATGGAGCAGTTGTTCTTGAAGTGGCAAGTGAAGGAGGC  
CAATTGAGAGGGAAACAACAAGAGTTGAGAAAGTTGGAGTGAATAGTAACCTTAGTTGAAT  
GGTTTTGGGATTGCATAGAGAAGGGAATTTGCTAATGGCAGCTGATTCAAGACTATGT



GGTGAGTTTGTATGAAGGAGAAATGAGAAGGGTACTAATGGTTGGGTTAGCTTGTTCCACA  
ACCTGACCCTATGGTTAGACCAACAATGAGAAGTGTGGTCCAAATGCTAGTAGGTGAAG  
CTGAAGTTCCTATTGTCCCAAGAACTAAGCCTTCTATGAGTTTTAGCACATCACATCTTCT  
AATGACTTTGCAAGATAGTGTCTGATTTGAATGGTATGATCACACTTTCAACTTCATCA  
TCTGAAAACAGCTTCAATAGTGCTGGCAATGGCATGGACTTGGTCTAA

>NbS00026192g0010.1

MKLIPAYSNILVWFILLFCFCSSNKSIFAITEFDFGTLTLSNLKLLGDAHLGDNNSVQLTRDLAV  
PNSGSGKALYSKPVRFRQPGLDFPASFTFFSFSVTNLNPSSIGGGGLAFVLPNDESVDAG  
GYMGILDSKGTQSGTMSVEFDTLMDVEFKDINGNHVGLDLNSMVSTQVGDLSIGIDLKSGD  
IVNSWIEYSGSTAELNVFVSYSNIKPKEPFLSVVLDIAEYVNDFMFVGFSGSTQGSTEIHSEW  
WSFSSSFDGSPKSAATAAPPPPTASLMNPTADSVKSRPPSMAPSESNSSASIMQDKSSGKC  
HNNFCKQGP GAVVGVVTASAFFLAFATLVLWLITKFKKVKNSEFLASDVIKMPKEFSYKEL  
KLATKAFDSTRIIGHGAFGTVYKILPDNGGIVAVKRCSHNGQGKAEFLSELSIIGTLRHRNLV  
RLQGWCHEIGEILLVYDLMPNGSLDKALFESRMILPWVHRRKILLGVASALAYLHQECENQVI  
HRDIKSSNIMLDEGTSHELLMTLQDSVSDLNGMITLSSSSSENSFTGVANGMDLVSSSLLLRHV  
YFMEKTHGPACS

>NbS00026192g0010.1 Corrected; GenBank ID: KT225311

MKLIPAYSNILVWFILLFCFCSSNKSIFAITEFDFGTLTLSNLKLLGDAHLGDNNSVQLTRDLAV  
PNSGSGKALYSKPVRFRQPGLDFPASFTFFSFSVTNLNPSSIGGGGLAFVLPNDESVDAG  
GYMGILDSKGTQSGTMSVEFDTLMDVEFKDINGNHVGLDLNSMVSTQVGDLSIGIDLKSGD  
IVNSWIEYSGSTAELNVFVSYSNIKPKEPFLSVVLDIAEYVNDFMFVGFSGSTQGSTEIHSEW  
WSFSSSFDGSPKSAATAAPPPPTASLMNPTADSVKSRPPSMAPSESNSSASIMQDKSSGKC  
HNNFCKQGP GAVVGVVTASAFFLAFATLVLWLITKFKKVKNSEFLASDVIKMPKEFSYKEL  
KLAPKAFDSTRIIGHGAFGPVSKGILPDNGGIVAVKRCSHNGQGKAEFLSELSIIGTLRHRNLV  
RLQGWCHEIGEILLVYDLMPNGSLDKALFESRMILPWVHRRKILLGVASALAYLHQECENQVI  
HRDIKSSNIMLDEGFNARLGDGLARQVEHDKSPDVTVAAGTMGYLAPEYLLTGRATEKTDV  
FSYGAVVLEVASGRRPIERETTRVEKVGKSNLVEWWGLHREGNLLMAADSRLYDEFDEG  
EMRRVLMVGLACSQPDPMVRPTMRSVVQMLVGEAEVPIVPRTKPCMSFSTSHLLMTLQDS  
VSDLNGMITLSSSSSENSFTGVANGMDLV

>NbS00026192g0010.1 Corrected; GenBank ID: KT225311

ATGAAGTTAATTCCTGCATATAGCAACATTCTTGATGGTTCATACTATTGTTCTGTTTTG  
CAGTAGTAATAAATCAATATTTGCTATAACTGAGTTTGACTTTGGAACATTAECTCTGAGT  
AATTTGAGCTTCTTGAGATGCTCATTGGGTGACAACAACAGTGTTCAAGTTAAGCAGT  
GATCTTGCCGTGCCAAATCCGGTCCGGAAAAGCTTTATATTCAAAGCCAGTAAGATTC  
CGGCAGCCGGTCTTGATTTCCGGCGAGTTTCTCTACATTCTTTTCAATTTTCAAGTGACT  
AATTTGAACCCATCATCTATCGGTGGCGGCCTTGCTTTTGTACTCACTCCTAATGATGAG  
TCAGTAGGTGATGCTGGTGGGTATATGGGAATCTTGATTCAAAGGCACACAAAGTGG  
TACGATGTCAGTTGAATTTGACACCCTTATGGATGTTGAGTTTAAAGATATTAATGGAAAT  
CATGTTGGTTTGGATCTGAATTCATGGTTTCAACTCAAGTTGGTGAATTTAGGTTCTATTG  
GTATTGATCTCAAGAGTGGTGAATAGTCAATTTCTTGATTGAATATTCTGGTTCTACTGC  
AGAGTTGAATGTGTTTGTATCATACTCTAATATAAAACCAAAGGAACCATTTTTGTCTGTT  
GTTTTGGATATTGCTGAATATGTAATGATTTTCAATGTTTGGTGGTTTTCTGGTTCAACTC  
AAGGGAGTACTGAGATTCATAGTATTGAGTGGTGGAGTTTTAGTTCATCATTGATGGAA  
GTCCTAAGTCGGCCGCCACGGCTGCGCCACCACCGCCAACAGCTAGCTTATGATGAACCC  
AACGGCAGATTCAGTCAAGTCGCGGCCACCTTCTATGGCTCCTTCAGAATCTAATAGTAG  
TGCAAGTATAATGCAAGATAAGAGCAGTGGGAAATGTCATAACAATTTTTGTAAACAAGG  
TCCTGGAGCTGTTGTTGGGGTGGTAACTGCTAGTGCATTTTTTTCTTGATTTGCTACATT  
AGTACTTATTTGGTTATACACCAAAAAGTTCAAGAAAGTGAAAATTCTGAATTTTTGGCA  
TCTGATGTTATCAAATGCCTAAAGAGTTTAGCTATAAAGAGCTTAAATTGGCTCCAAAAG  
CTTTTGAATTCGACGAGGATTATAGGCCACGGTGCATTTGGGCCAGTTTCAAAGGGCATT  
TACCGGACAATGGTGGCATTGTGGCAGTGAAGAGATGTAGTCATAATGGACAAGGGAAA  
GCGGAGTTCTTATCAGAATTATCTATAATTGGAACACTTAGGCACAGAAATCTTGTTAGAC  
TTCAAGGATGGTGCATGAGATAGGTGAAATTTTGTAGTCTATGATCTTATGCCTAATG  
GGAGTCTTGATAAGGCATTATTTGAATCAAGAATGATTCTACCTTGGGTACATAGGAGGA  
AAATTTTGTAGGTGTTGCTTCAGCCTTGGCATATTTACATCAAGAATGTGAAAACCAGG  
TGATTCACAGGGATATAAAGAGTAGTAACATTATGTTGGATGAAGGGTTCAATGCAAGAT  
TAGGTGATTTGGATTAGCAAGACAAGTTGAACATGACAAGTCCCCCGATGTAACAGTAG

CAGCTGGGACAATGGGCTACTTGGCTCCTGAATACTTGTTAACCGGAAGAGCAACCGAA  
AAAACCTGATGTTTTAGCTATGGAGCTGTGGTTCTTGAAGTGGCAAGTGAAGGAGGCC  
AATTGAGAGGGGAAACAACAAGAGTTGAGAAAGTTGGAGTGAAGAGTAACCTAGTTGAAT  
GGGTTTGGGGATTGCATAGAGAAGGGAATTTGCTAATGGCAGCAGATTCAAGACTTTAT  
GATGAGTTTGATGAAGGAGAAATGAGAAGGGTACTAATGGTTGGGTTAGCTTGTTACAA  
CCTGACCTATGGTTAGACCAACAATGAGAAGTGTGGTCCAAATGCTAGTAGGTGAAGC  
TGAAGTTCCTATTGTCCCAAGAACTAAGCCTTGTATGAGTTTCAGCACATCACATCTTCTA  
ATGACTTTGCAAGATAGTGTCTGATTTGAATGGTATGATCACACTTTCCTCTTCATCAT  
CTGAAAACAGTTTCACTGGTGTGCCAATGGGATGGACTTGGTCTAA

---

>NbS00008527g0008.1

MEIYPLLIVFCVLASNGFGVLSTTEFDGILALNSLKLLGDAHMGNNKIKLTRELAVPNSGTGK  
VLYSKPVRFRQPGLDFPASFTFFSFSVTNLNPSSIGGGLAFVITPEDDLVGDSGGYL GIMDA  
KGTQNGNFAIEFDLMDVEFKDINGNHVGLDLNSMVSTQVGDLD SIGVDLKSGDLVNSWVE  
YSGSNKKNIFVSYSNLKPKEPFLSVTIDLSEYVNDFMFVGFCGSTQGSTEIHSIEWWSFSSS  
FDVNPKSPAAALPPPPTASLMNPTANSVTSPPPSMAPVQSNGTVNSEQKSSSSKCHNSFC  
KQGAGAVVGVVTAGAFFLAFATLVLVWLYSNKFKNVKNSENLGSDIKMPKEFSYKELKIATK  
GFDSTRIIGHGAFGTVYKILSETGDIVAMKRDGAFGTVYKILSETGDIVAVKRC SHNGQGK  
AEFLSELSIIGTLRHRNLVRLQGWCHEKGEILLVYDLMPNGSLDKALFESRIVLPWLHRRKILL  
GVASALAYLHQECENQDSVSDLGMITLSTSSSENSFNCGGVGMDLV

>NbS00008527g0008.1 Corrected; GenBank ID: KT225312

MEIYPLLIVFCVLASNGFGVLSTTEFDGILALNSLKLLGDAHMGNNKIKLTRELAVPNSGTGK  
VLYSKPVRFRQPGLDFPASFTFFSFSVTNLNPSSIGGGLAFVITPEDDLVGDSGGYL GIMDA  
KGTQNGNFAIEFDLMDVEFKDINGNHVGLDLNSMVSTQVGDLD SIGVDLKSGDLVNSWVE  
YSGTKKLNIFVSYSNLKPKEPFLSGTIDLSEYVNDFMFVGFCGSTQGSTEIHSIEWWSFSSS  
FDVNPKSPAAALPPPPTASLMNPTANSVTSPPPSMAPVQSNGTVNSEQKSSSSKCHNSFC  
KQGAGAVVGVVTAGAFFLAFATLVLVWLYSNKFKNVKNSENLGSDIKMPKEFSYKELKIATK  
GFDSTRIIGHGAFGTVYKILSETGDIVAMKRC SHNGQGKAEFLSELSIIGTLRHRNLVRLQGW  
W CHEKGEILLVYDLMPNGSLDKALFESRMVLPWLHRRKILLGVASALAYLHQECENQVIHRDI  
KTSNIMLDEGFNARLGD FGLAKQIEHDKSPDATVAAGTMGYLAPEYLLTGRASEKTDVFSYG  
AVVLEVASGRRPIEKETNGVGKVLNSNLVEVWVGLHKEGRLLAAADSR LNSEFEEQEMR  
RVLLVGLACSHDTPMARPTMRGVVQMLVGEAEVPIV PRAKPTMSFSTSHLLMTLQDSVSDL  
DGMITLSTSSSENSFNCGGVGMDLV

>NbS00008527g0008.1 Corrected; GenBank ID: KT225312

ATGGAGATTTACCCATTACTTATAGTGTCTGTGCTTGGCTAGTAATGGGTTCCGGTGTA  
CTGTCTACTACTGAGTTTGATTTTGGTATTTTAGCTTTGAACAGTTTAAAGCTATTAGGAG  
ATGCTCATATGGGTAATAACAAAATCAAATTGACACGTGAGCTCGCCGTTCCAAATTCCG  
GTACCGGAAAAGTTTTATATTCTAAACCAGTAAGATTCCGGCAGCCGGGTCTTGATTTTC  
CGGCGAGTTTCTCTACGTTTTCTCATTCTGTTACAAATCTGAACCTTCATCGATCGG  
CGGTGGTTTAGCTTTTGTATCACGCCGGAAGATGACTTGGTTGGAGACTCCGGTGGTT  
ATTTGGGAATTATGGATGCAAAGGGACCCAAAATGGTAATTTTGCTATTGAATTTGATAC  
ACTTATGGATGTTGAATTTAAAGATATTAATGGGAATCATGTGGGGTTGGATTTAAATTCA  
ATGGTTTCAACGCAAGTTGGTGATCTTGATTCTATTGGTGTGATCTAAAGAGTGGTGAT  
TTAGTAAATTCATGGGTTGAATATTCAGGTTTAAACAAAAAGCTGAATATTTTGTTCATA  
TTCTAATTTAAAGCCCAAAGAACCATTTTTATCAGGTACTATTGATCTTTCTGAGTACGTA  
AATGATTTTATGTTTGTGGGTTTTGTGGTTCAACACAAGGGAGTACTGAGATTCATAGT  
ATTGAATGGTGGAGTTT CAGTTCATCATTTGATGTAATCCAAAATCTCCAGCGGCGGCG  
CTGCCTCCGCCGCCCCCAACCGCTAGTTTGATGAATCCACGGCGAATTCTGTTACATC  
GCCGCCGCTTCGATGGCTCCTGTT CAGTCTAATGGTACTGTGAATTCAGAGCAAAAAA  
GTAGTAGTAGCAAATGCCATAACAGTTTTTGTAAACAAGGTGCTGGAGCTGTTGTTGGAG  
TTGTA ACTGCTGGCGCATT TTTCTTAGCTTTTGTACATTAGTACTTGT TTTGGTTGATT C  
CAACAAATTCAAGAATGTGAAGAATTCTGAAAATTTGGGGTCTGATATAATCAAAATGCCT  
AAGGAATTCAGCTATAAGGAGCTCAAATCGCGACGAAAGTTTTGATTCGACGAGGAT  
AATCGGGCATGGTGCATTTGGAACAGTTTATAAGGGGATTTTATCTGAGACTGGTGACAT  
TG TAGCAATGAAAAGGTGTAGTCATAACGGACAAGGGAAAGCTGAGTTTTTATCTGAATT  
ATCAATAATTGGAACACTTAGGCATAGAAATCTTGTTAGACTTCAAGGATGGTGT CATGA  
GAAAGGTGAAATTTTGTAGTTTATGATTTGATGCCAAATGGTAGTCTTGATAAGGCATTA  
TTTGAGTCAAGAATGGTACTCCCATGGCTACATAGGAGGAAAATTTTGTAGGTGTTGCT

TCAGCCTTAGCATATTTACATCAAGAATGTGAAAATCAAGTTATTCATAGGGATATTAAGA  
CTAGTAATATTATGTTGGATGAAGGGTTTAAATGCAAGATTAGGTGATTTTGGATTAGCAAA  
ACAAATTGAACATGACAAATCTCCTGATGCAACAGTAGCAGCAGGAACAATGGGATACTT  
AGCACCGGAATATTTGTTAACCGGTGAGCAAGTGAAAAACTGATGTTTTAGCTATGG  
GGCAGTGGTTCTTGAAGTGGCAAGTGGGAGAAGGCCAATAGAGAAAGAAACAATGGG  
GTTGGGAAAGTTGGATTGAATAGTAATTTGGTGAATGGGTGTGGGGATTGCATAAAGA  
AGGGAGATTATTAGCAGCAGCTGATTCAAGATTGAATAGTGAGTTTGGAGAACAAAGAAAT  
GAGAAGGGTTTTGTTAGTTGGTTTGGCTTGTTACACACTGACCCTATGGCTAGACCAAC  
AATGAGAGGTGTTGTTCAATGTTAGTTGGTGAGGCTGAAGTTCCAATTGTTCTAGAGC  
TAAGCCAATGAGTTTTAGCACATCTCATCTGCTAATGACATTGCAGGACAGTGTCTTCT  
GACTTGGATGGTATGATCACACTTTCAACTTCTTCATCTGAAAATAGCTTCAATTGTGGTG  
GTGTGGGTATGGACCTAGTCTAG

---

> NbS00016101g0013.1

MEIYPLLIVLFCFLASNGFVSVLSTTEFDGFTLALNSLKLGDHMGGNKIKLTRELAVPNSGAG  
KVLYSKPVRFRQPGLDFPASFFSFSVTNLNPSSIGGGLAFVITPDDSVGDAGGYLGIMD  
AKGTQNGNFAIEFDLMDVEFKDINGNHVGLDLNSMVSTQVGDLDVSVGVDLKSGLVNSWV  
EYSGSNKKNIFVSYSNLKPKPFLSVTIDLSEYVNDFMFVGFVCGSTQGSTEIHSEWWSFSS  
SFDVNPKSPAAALPPPPTASLMNPTADSVTSLPPSTAPLQSNQTVNSEQKSSSSKCHNSF  
CKQGAGAVVGVVTTAGAFFLAFATLVLVWLYSKKFKNVENSENLGSDIIMPKPKEFSYKELKIAT  
KGFDSRIIGHGAFGTVYKILSETGDIVAVKRCSHNGQGKAEFLSELSIIGTLRHRNLVRLQG  
WCHKEGELLVYDLMPNGSLDKALFESRMVLPWLHRRKILLGVASALAYLHQECENQVMLR  
DIKTSNIMLDEGFNARLDSVSDLNGMITLSTSSSENSFNNGGGVGM DLV

>NbS00016101g0013.1 Corrected; GenBank ID: KT225313

MEIYPLLIVLFCFLASNGFVSVLSTTEFDGFTLALNSLKLGDHMGGNKIKLTRELAVPNSGAG  
KVLYSKPVRFRQPGLDFPASFFSFSVTNLNPSSIGGGLAFVITPDDSVGDAGGYLGIMD  
AKGTQNGNFAIEFDLMDVEFKDINGNHVGLDLNSMVSTQVGDLDVSVGVDLKSGLVNSWV  
EYSGSNKKNIFVSYSNLKPKPFLSVTIDLSEYVNDFMFVGFVCGSTQGSTEIHSEWWSFSS  
SFDVNPKSPAAALPPPPTASLMNPTADSVTSLPPSTAPLQSNQTVNSEQKSSSSKCHNSF  
CKQGAGAVVGVVTTAGAFFLAFATLVLVWLYSKKFKNVENSENLGSDIIMPKPKEFSYKELKIAT  
KGFDSRIIGHGAFGTVYKILSETGDIVAVKRCSHNGQGKAEFLSELSIIGTLRHRNLVRLQG  
WCHKEGELLVYDLMPNGSLDKALFESRMVLPWLHRRKILLGVASALAYLHQECENQVMLR  
DIKTSNIMLDEGFNARLGDVFLAKQIEHDKSPDATVAAGTMGYLAPEYLLTGRASEKTDAFSY  
GAVVLEVASGRRPIEKETNGVGVGLNSNLVEVWVWGLHKEGRLLAAADSRLNGEFEEQEM  
RRVLLVGLACSHPDPMARPTMRGVVQMLVGEAEVPIVPRAKPTMSFSTSHLLMTLQDSVSD  
LNGMITLSTSSSENSFNNGGGVGM DLV

>NbS00016101g0013.1 Corrected; GenBank ID: KT225313

ATGGAGATTTACCCATTACTGATAGTATTATTTGTTTCTTGGCTAGTAATGGGTTTCAGTG  
TACTGTCTACTACTGAGTTTGATTTTGGTACTTTAGCTTTGAACAGTTTAAAGCTATTAGG  
AGATGCTCATATGGGTGGCAACAAAATCAAATTGACACGTGAGCTCGCCGTGCCAAATT  
CCGGTGCCGAAAAGTTTTATATTCTAAACCAGTAAGATTCCGGCAGCCAGGTCTTGATT  
TTCCGGCGAGTTTCTCTACGTTTTTCTCATTTTCTGTTACAAATCTGAACCCTTCATCGAT  
CGGCGGGGGTTTAGCTTTTGTATCACGCCGGATGATGAATCAGTAGGTGATGCCGGC  
GGCTATTTGGGAATTATGGATGCAAAAGGGACCCAAAATGGTAATTTTGCAATTGAATTT  
GATACACTTATGGATGTTGAATTTAAAGATATTAATGGGAATCATGTGGGGTTAGATTTAA  
ATTCAATGGTTTCAACTCAAGTTGGTATCTTGATTCTGTTGGTGTGATCTCAAGAGTG  
GTGATTTGGTAAATTCATGGGTTGAATATTCAGGTTCTAACAAAAGCTGAATATTTTGT  
TTCATATTCTAATTTAAAGCCCAAAGAACCATTTTTATCAGTTACTATTGATCTTTCTGAGT  
ATGTAATGATTTTATGTTTGTGGGTTTTGTGGTTCAACACAAGGGAGTACTGAGATTC  
ATAGTATTGAATGGTGGAGTTTTCAGTTCATCATTGATGTAATCCAAAATCTCCGGCGG  
CGGCGCTGCCTCCTCCGCCGCAACGGCTAGTTTGTGATGAATCCACGGCAGATTCTGTT  
ACATCGCTGCCGCTTCGACGGCTCCATTGCAGTCTAATGGTACTGTGAATTCAGAGCA  
AAAAAGTAGTAGCAAATGCCATAACAGTTTTTGTAAACAAGGTGCTGGGGCTGTTGT  
TGGTGTGTAAGTGTGGAGCATTTTTCTAGCTTTTGTACATTAGTACTTGTGGTTG  
TATTCGAAAAATTCAAGAATGTGGAGAATTCTGAAAATTTGGGGTCTGATATTATCAAAA  
TGCCTAAGGAATTCAGCTATAAGGAGCTTAAATTTGCGACGAAAGGTTTTGATTTCACGA  
GGATTATAGGGCATGGTGCATTTGGGACAGTTTATAAGGGGATTTTGTCTGAGACTGGT  
GATATTGTAGCAGTGAAAAGGTGTAGTCATAATGGACAAGGTAAAGCTGAGTTTTTATCT

GAATTATCAATAATTGGAACACTTAGGCATAGAAATCTTGTTAGACTTCAAGGATGGTGTC  
ATGAGAAAGGTGAAATTTTGTAGTTTATGATTTGATGCCAAATGGTAGTCTTGATAAGGC  
ATTATTTGAGTCAAGAATGGTACTCCCATGGCTACATAGGAGGAAAATTTTGTAGGTGT  
TGCTTCAGCCTTAGCATATTTACATCAAGAATGTGAAAATCAAGTTATGTTAAGGGATATT  
AAGACTAGTAATATTATGTTGGATGAAGGGTTAATGCAAGATTAGGTGATTTTGGGTTA  
GCAAACAAATTGAACATGACAAATCTCCTGATGCGACAGTAGCAGCAGGAACAATGGG  
ATACTTAGCACCTGAATATTTATTAACCGGTGCGAGCAAGTGAAAAACTGATGCTTTTAC  
TATGGCGCAGTGGTTCTTGAAGTGGCAAGTGGGAGAAGGCCAATTGAGAAAGAAACAAA  
TGGGGTTGGGAAAGTTGGATTAATAGCAATTTGGTGGAAATGGGTTTGGGGATTACATAA  
AGAAGGGAGGTTATTAGCAGCAGCTGATTCAAGATTGAATGGTGAGTTTGGAGAACAAAG  
AAATGAGAAGGGTTTTGTAGTTGGTTTGGCTTGTTCACACCCTGACCCTATGGCTAGAC  
CAACAATGAGAGGTGTGGTTCAAATGTTAGTTGGTGAGGCTGAAGTTCCAATTGTCCCTA  
GAGCTAAGCCAACTATGAGTTTTAGCACATCTCATCTGCTAATGACTTTGCAAGATAGTG  
TTTCTGACTTGAATGGTATGATCACACTTCCACGTCTTCATCTGAAAAAGCTTCAATGG  
TGGTGGTGGGATGGACCTAGTCTAG

---

>NbS00034752g0003.1 GenBank ID: KT225314  
MNSISLVIIFFLIPFVHSIYFKIPRFGPDVTDILYEGDAVASVGEIEFNKFTYLCRVAHAIYKEKVP  
IWDPDSTKLADFFTHFSFTIDTLNRSLYGHGIAFFLAQVGFHIPPNSDGGFLGLFNTTSDSAQ  
NQIVVVEFDSFSNPEWDPPEFHVGINKNSIASSVTAPWNTLVILRKWRRRKMKRNPETISLTS  
FNDDLEKGTGPKKFSYEELDTSTNHFSEERKLGEGGFGEVYKGYLIDLIAIAVKKISRGSKQ  
GKKEYITEVKVISRLRHRNIVQLIGWCHDQEWQCVIHRDIKSSNVMLDSSFNVKLGDFGLAR  
LMDHELGPQTTGLAGTLGYLAPEYIKTGRASKESDVYSFGIVAQEIATGRKSVDPGTGKSDA  
VLVEYVWELYKGQLLSAVDEKLNLDFAKQVERLMATRLWCAHPESNLRPSIRQAIHVLNFE  
ASLPNIPIKMPVPVYDLPSSGEPGVSSGEPTITYTSIDVGR

>NbS00034752g0003.1 GenBank ID: KT225314  
ATGAACTCCATTTCCCTCGTTATTATCTTCTTTCTAATTCCGTTTGTACATTCAATCTACTT  
TAAATACCACGTTTTGGCCCGGACGTGACTGATATACTCTATGAAGGAGATGCAGTTGC  
TTCTGTAGGAGAGATTGAGTTTAAACAATTTACTTATCTTTGTCGAGTTGCACATGCTATC  
TATAAAGAGAAAGTACCAATTTGGGATCCTGACTCTACTAACTTGCTGATTTCTTCACAC  
ATTTTTCGTTCACTATCGATACTCTAAATCGTTCTTTGTATGGTCATGGCATTGCATTTTTC  
CTCGCTCAGGTTGGTTTTCATATCCACCTAACTCAGATGGTGGTTTTCTTGGACTGTTT  
AATACTACCACCAGTGATTGAGCTCAAACCAAATTGTTGTTGTTGAGTTTACTCGTTTT  
CCAACCCCGAATGGGATCCTCCATTGAAATGTTAGTTTACATAGTGGAAATCCTATCGATGCA  
TACTTACAAATTCACGACAAAAAATCTGAGTGTCTTTTGGAACTATGGAAAAGGCTCCAA  
TTCCAGCATATCTTATATAATAAACCTTAGAGAGTTTTGCCTTCGTGGATAACGATAGGA  
TTCTCTGCTGCAACAGGTACAAATGTTGAACGACATACACATGAATCGTGGGAGTTCAGC  
TCGAGTCTTGATATGACAGACTTAGGGGGAAATGGTCGCAGAAAGATTGGATTGATTGC  
AGGGTTAACAGCATTAGGGGGAGTTTTATTTGTGGGCGCGATTTAGACTTTAGTAATATT  
GAGGAAATGGAGACGACGAAAGATGAAGAGAAATCCAGAGACAATAAGCTTAACATCTT  
TCAATGATGATCTTGAAGGGAACAGGACCGAAAAAGTTTTCTTACGAAGAGCTGGATA  
CGTCAACAAATCACTTCTCAGAGGAACGAAAGTTGGGCGAAGGAGGATTTGGAGAAGTT  
TACAAAGGTTACCTCATAGATCTTGATATTGCGATTGCGGTGAAGAAGATCTCGAGAGGG  
TCTAAGCAGGGGAAAAAGGAATACATAACCGAGGTGAAGGTTATAAGTCGGTTAAGACA  
TAGAAATATTGTGCAGCTAATTGGTTGGTGTGATGACCAAGGTAAGTTCTTACTTGTTTAC  
GAATTCATGCCAAATCGTAGCTTAGATTGTCACCTATTTGGTAAGAGCAATCCTCTTAGTT  
GGAGTACGAGGTATAAGATATCGCTCGGATTAGCATCTGCCTTGCTCTATCTACACGAAG  
AATGGGAGCAGTGTGTGATCCATAGAGACATCAATCGAGTAATGTAATGCTCGATTCAA  
GTTTTAATGTCAAGCTCGGTGATTTTGGCTTAGCTAGACTAATGGACCATGAATTAGGTC  
CTCAGACTACAGGGTTGGCTGGAACTTTAGGTTATTTGGCTCCTGAATACATAAAAAACAG  
GCCGAGCAAGTAAAGAGTCAGACGTATACAGCTTCGGAATAGTTGCACAAGAAATTGCA  
ACCGGAAGAAAATCAGTTGATCCGGGGACGGGGAAATCTGATGCAGTGTTAGTGGAGTA  
TGTTTTGGGAGCTTTATAAAGGACAACCTTTCTGCTGTTGATGAGAAATTAACCTGGAT  
TTTGACGCGAAACAAGTAGAGCGATTGATGGCTACCAGGTTATGGTGTGCTCATCCGGA  
GAGCAATCTGAGGCCATCTATAAGACAAGCAATTCATGTTCTGAATTTGAGGCATCATT  
GCCTAATATACCAATTAAGATGCCAGTTCCTGTGTATGATTTACCTAGTTCTGGTGAACCA  
GGAGTTAGCTCGGGGGAGCCTACAATTACTTACACGAGCATTGATGTAGGTCGTTAA

---

>NbS00059538g0001.1

MIRFVSSKINPLSLFITFFLIPFVNSVYFKIPRFGPDVTDILYEGDAVASIGDIEFNKVTYLCRVA  
HAIYREKVIWDPDSTKLADFSTHFSFTIDTLNRSLYGHGIAFFLAPVGFRIPPNSDGGFLGLF  
NTTSDSAQNQIVVVEFDSFSNPEWDPPEYEHVGINKNSIASSMTAPWNVSLHSGDPIDAWIT  
YNSTTKNLSVFWNYGKGSNSSISYVINLKEVLPSWITIGFSAATGTNVERHTLESWEFSSSLDI  
TELGNGRRKIGLIAGLTALGGVLFVSTIFALVIFRKWRRQKMKNPETISLTSFNDDLEKGTG  
PKKFSYEELDTSTNHFSEERKLGEGGFGEVYKGYLIDLIAVAVKRISRGSKQKKEYITEVK  
VISRLRHRNLVQLIGWCHDQKFLVYEFMPNGSLDCHLFGKRNPLSWSTRYKILLGLASALL  
YLHEEWEQCVIHRDIKSSNVMLDSSFNVKLGDFGLARLMDHELGPQTTGLAGTLGYLAPEYI  
KTGRASKESDVYSFGVVALEIATGRKSVDPGTRKSNVGLVEYVWDLYGKGQLLSAVDEKLN  
LVFDAKQVELLMITGLWCAHPESNLRPSIRQAIHVLNFEASLPNIPIKMPVPPVYLLPSSGEPGT  
IILKILNLSRELRFIDAA

>NbS00059538g0001.1 Corrected; GenBank ID: KT225315

MIRFVSSKINPLSLFITFFLIPFVNSVYFKIPRFGPDVTDILYEGDAVASIGDIEFNKVTYLCRVA  
HAIYREKVIWDPDSTKLADFSTHFSFTIDTLNRSLYGHGIAFFLAPVGFRIPPNSDGGFLGLF  
NTTSDSAQNQIVVVEFDSFSNPEWDPPEYEHVGINKNSIASSMTAPWNVSLHSGDPIDAWIT  
YNSTTKNLSVFWNYGKGSNSSISYVINLKEVLPSWITIGFSAATGTNVERHTLESWEFSSSLDI  
TELGNGRRKIGLIAGLTALGGVLFVSTIFALVIFRKWRRQKMKNPETISLTSFNDDLEKGTG  
PKKFSYEELDTSTNHFSEERKLGEGGFGEVYKGYLIDLIAVAVKRISRGSKQKKEYITEVK  
VISRLRHRNLVQLIGWCHDQKFLVYEFMPNGSLDCHLFGKRNPLSWSTRYKILLGLASALL  
YLHEEWEQCVIHRDIKSSNVMLDSSFNVKLGDFGLARLMDHELGPQTTGLAGTLGYLAPEYI  
KTGRASKESDVYSFGVVALEIATGRKSVDPGTRKSNVGLVEYVWDLYGKGQLLSAVDEKLN  
LVFDAKQVELLMITGLWCAHPESNLRPSIRQAIHVLNFEASLPNIPIKMPVPPVYLLPSSGEPGV  
SSGDPTMTYTSIDVGR

>NbS00059538g0001.1 Corrected; GenBank ID: KT225315

ATGATACGATTTGTGTCTTCTAAAATAAACCTCTTTCCCTCTTTATTACCTTCTTTCTAAT  
TCCGTTTGTAATTCAGTCTACTTTAAAATACCACGTTTTGGCCCGGACGTGACTGACAT  
ACTCTATGAAGGAGATGCAGTTGCTTCTATAGGAGACATTGAGTTTAAACAAAGTCACTTA  
TCTTTGTGCGCTTGCACATGCTATATATAGAGAGAAAGTACCAATTTGGGATCCGGACTC  
TACTAACTTGCTGATTTCTCCACACATTTTTCGTTCACTATCGATACCTTAAATCGTTCTT  
TGATGGTCATGGCATTGCATTTTTCTCGCTCCGGTTGGTTTTCGTATTCCACCTAACTC  
AGATGGTGGTTTTCTGGACTGTTCAATACTACCACAGTGATTGAGCTCAGAACCAAT  
TGTTGTTGTTGAGTTTGACTCGTTTTCCAACCCGAATGGGATCCTCCATACGAACATGT  
TGGTATAAACAAAATTCTATTGCTTACTATGACAGCTCCATGGAATGTTAGTTTACAT  
AGTGGAGTCTTATTGATGCATGGATTACTTACAATTCTACGACAAAAAATCTAAGTGTCT  
TTTGGAACTATGGAAAAGGCTCCAATTCCAGCATATCTTATGTAATAAACCTTAAAGAGGT  
TTTGCCTTCGTGGATAACGATAGGATTCTCTGCTGCAACAGGTACAAATGTTGAAAGACA  
TACACTTGAATCGTGGGAGTTCAGCTCGAGTCTTGATATAACAGAGTTAGGGGGAAATG  
GTCGCAGAAAGATTGGATTGATTGCAGGGTTAACAGCATTAGGGGGAGTTTTGTTTGTG  
AGCACGATTTTTGCTTTAGTAATATTTAGGAAATGGAGACGACAAAAGATGAAGAAAAAT  
CCAGAGACAATTAGCTTAACATCTTTCAATGATGATCTTGAAAAGGGAACAGGACCGAAA  
AAGTTTTCTTACGAAGAGCTGGATACTTCAACAATCACTTCTCAGAGGAACGAAAGTTA  
GGCGAAGGAGGATTTGGAGAAGTTACAAAGTTACCTCATCGATCTTGATATCGCGGT  
TGCTGTCAAGAGGATCTCGAGAGGGTCTAAGCAAGGGAAAAAGGAATACATAACCGAAG  
TGAAGGTTATTAGTTCGGTTAAGACATAGAAATCTTGTCAGCTAATTGGTTGGTGTGATG  
ACCAAGGTAAGTTCTTACTTGTATATGAATTCATGCCAAATGGTAGCTTAGATTGCCACTT  
ATTTGGTAAAAGGAATCCTCTTAGTTGGAGTACGAGGTATAAGATATTACTCGGATTAGC  
ATCTGCTTTGCTCTATCTACACGAAGAATGGGAGCAGTGTGTGATCCACAGAGACATCAA  
ATCGAGTAATGTAATGCTAGATTCAAGTTTTAATGTCAAGCTCGGTGATTTTGGCTTAGCT  
AGACTAATGGACCATGAATTAGGTCCTCAGACTACAGGTTTGGCTGGAACCTTTAGGTTAT  
TTGGCTCCTGAATACATAAAAACAGGCGGAGCAAGTAAAGAGTCAGACGTATACAGCTTC  
GGAGTAGTTGCACTAGAAATTGCAACCGGAAGAAAATCAGTTGATCCGGGTACGCGGAA  
ATCTAATGTAGGGTTAGTGGAGTATGTTTGGGACCTTTATGGTAAAGGACAACCTTCTTTC  
TGCTGTTGATGAGAAATTAACCTGGTTTTTGACGCAAAAACAAGTAGAGCTATTGATGATT  
ACCGGGTTATGGTGTGCTCATCCGGAGAGCAATCTGAGGCCATCTATAAGACAAGCAAT  
TCATGTTCTGAATTTGAAGCATCATTGCCTAATATACCAATAAAGATGCCAGTTCTGTG  
TATTATTTACCTAGTTCTGGTGAACCAGGAGTTAGCTCGGGGGATCCTACAATGACTTAC

ACAAGCATTGATGTGGGCCGTTAA

---

>NbC25369236g0004.1 GenBank ID: KT225316  
MEKARGELADFTTHFSFVIDSNGNNSFADGLAFFLAPVGSIIPIGSAGNGLGLAKAELEVAHP  
LSHLLSSSIHFSIPGTHCIYMNNITPGKKNDAWISYNASSHTLKVVFTGFSNNKYNKDSL SLLI  
DLRNYLPENVTFGFSASTGQLFQKKNVKS WDFNSSLSLEHAEQPSANPPIQVLNPNPDPIT  
QVQDPKFRPPREVSTRKKGNKGLVVGSSIGLPILLFVLITASCFLWKKRKRNDKDHV FIDLS  
MDNEFQKDRGPKKFSYGELARATNNFAEGQKL GEGGFGEVYEGLLKECKSYVAVKKVSSG  
SKQGIKEYASEVKIISRLRHRNLVQLIGWCHEKGLHLVYELMPNGKLR

>NbC25369236g0004.1 GenBank ID: KT225316  
ATGGAAAAAGCTAGAGGAGAATTGGCAGATTTACTACACATTTCTCCTTTGTTATTGATT  
CAAATGGTAACAATAGCTTTGCTGATGGACTCGCCTTTTTCTTGGCTCCTGTGGGTTCCA  
GTATCCCAATTGGTTCAGCTGGCAACGGCCTTGGTCTTGCCAAGGCCGAGTTAGAAGTA  
GCTCATCCGCTGAGCCATTTGTTGCTATCGAGTTCGATACATTTCTCAATACCTGGGACC  
CACTGTATTTACATGTTGGTATCAATTTAAATTCTATGAAATCTGCGGTTACTCTAAGTAT  
GGAGGAATAACATTACACCAGGGAAGAAAAATGATGCTTGGATTAGTTACAATGCTAGTT  
CCCATACTCTTAAAGTTGTTTTCACTGGATTTTCAAATAACAAATATAACAAGGACAGCCT  
TAGTTTATTGATTGATCTGAGGAATTATTTGCCTGAGAATGTTACTTTTTGGCTTCTCAGCA  
TCAACAGGACAATTGTTTCAGAAAAAAAACAATGTCAAGTCTTGGGATTTCAATTCAGTT  
TGAGTTTAGAACATGCTGAACAGCCTAGTGCAAACTCCTCCATTCAAGTTCTAAATCCAA  
ATGATCCTCCTATTACTCAAGTTCAAGATCCAAAGTTTTCGTCCTCCTCGAGAAGTCAGCA  
CCAGGAAAAAAGGAAACAAGGGACTAGTAGTTGGATCAAGCATAGTTTTACCTATTCTGC  
TTTTCGTATTGATTACTGCCAGCTGCTTTTTATGGAAGAAAAAGAGGAAAAGGAATGATAA  
AGACCATGTTTTTATTGATCTCAGTATGGACAATGAATTTCAGAAGGATAGAGGCCCTAA  
GAAGTTTTTCATATGGTGAATTAGCTCGTGCAACGAACAACCTTTGCTGAGGGACAGAAGCT  
TGGAGAAGGTGGATTTGGCGAAGTTTATGAAGGTTTATTGAAGGAATGTAATCATATGT  
TGCTGTTAAGAAAGTATCAAGCGTTCTAAACAAGGAATAAAGGAGTATGCATCAGAAGT  
GAAGATCATAAGCCGATTAAGACATAGAAATTTGGTTCAACTTATTGGTTGGTGTACAGA  
GAAAGGGCAGTTGCATCTTGTATGAATTGATGCCTAATGGAAAGCTTAGATAA

---

>NbS00000562g0002.1 GenBank ID: KT225317  
MVF SKILNILLFLILFLIPSFYSLNLFNLSSINPSDANRSINVTGDAYISKQGIQVTPDERNVALGR  
KTGRANFIEPLQLWNKATGELSDFTTHFSFVIDSNGNDSFADGLAFFLAPVGSIIPIGSAGNG  
LGLAKAELEGSSSPEPFVAIEFDLNTWDPQYLHVGINVNSMESAVAQVWRNDITLGKKN  
AWICYDASSHTLKVVFTGFSNNKYNKDSL SLLIDLRLNYPENVTFGFSASTGQLFQKNNVKS  
WDFNSSMFDPNKVEHAEPSPANPPITQVTPPSNQEISTRKKGNKGLVVGSSIGLPILVIVLI  
TGSCFLWKKKSKRNDKDHV FIDLSMDNEFQKGTGPKKFSYGELARATNNFAEVQKL GEGGF  
GEVYEGLLKECKSYVAVKRVSSGSKQGIKEYASEVMIISRLRHRNLVQLIGWCHEKGLHLV  
YELMPNGSLDKHLFKEKSLLVWEIRWKIVQGLASALLYLHEEWEQCVVHRDVKASNVM LDS  
NFNAKLGD FGLARLVDHEKGSQTTMLAGTVGYMAPECVMNGKASKESDVYSFGIVALEIAS  
GRKSIDIKAAEDQVRLVEWIWNLYGIGKLV EATDPRLNKIYNEQQMERLMVLGLWCAHPDNK  
LRPSIRQAIHVLNSEVQLPILPSRMPVATYSPPLNMFSPFSHTYETKTVGSEQEQTMTYTY  
NTKSSSVYTSSAASSTKSL

>NbS00000562g0002.1 GenBank ID: KT225317  
ATGGTTTTTCAGCAAATTTTGAACATCTTGCTATTCTTAATACTTTTTCTTATCCCTTCTTT  
CTATTCATTGAACTTTAACTCTCCAGCATCAATCCTTCTGATGCTAATCGTTCTATCAAT  
GCTACTGGAGACGCCTATATATCGAAACAAGGCATCCAAGTCACCCCTGATGAACGTAA  
CGTGGCATTAGGTAGAAAACTGGTCGAGCTAATTTTATTGAGCCGCTGCAATTATGGAA  
TAAGGCTACAGGAGAATTGTCAGATTTTACTACGCATTTCTCCTTTGTTATTGATTCCAAT  
GGTAACGATAGCTTTGCTGATGGACTCGCCTTTTTCTTGGCTCCTGTGCGTTCCAGTATC  
CCTATTGGTTCAGCTGGTAACGGCCTTGGTCTTGCCAAGGCCGAGTTAGAAGGCAGCTC  
ATCCCCTGAGCCATTTGTTGCTATCGAGTTCGATACATTTCTCAATACCTGGGACCCACA  
GTATTTACATGTTGGTATCAATGTAATTTCTATGGAATCTGCTGTTGCTCAAGTATGGAGG  
AATGACATTACGCTGGGGAAGAAAAATGATGCTTGGATTTGTTACGATGCTAGTTACAT  
ACTCTTAAAGTTGTTTTCACTGGATTTTCAAACAATAAATAACAAGGATAGCCTTAGTTT  
ATTGATTGATCTGAGGAATTTTCCCGGAGAATGTTACTTTTTGGCTTCTCAGCATCAACT  
GGACAATGTTTCAGAAAAACAATGTCAAGTCTTGGGATTTCAATTCAGTATGAGTTTTG

ATCCAAACAAAGTTCCTGAACATGCTGAACCGCCGAGTGCAAATCCTCCTATTACTCAAG  
TTACTCCTCCTTCTAACCAAGAAATCAGCACCAGAAAAAAGGAAATAAGGGACTAGTCG  
TTGGATCGAGCATAGGTTTGCCTATTCTGGTTATCGTATTGATTACTGGTAGCTGCTTTTT  
ATGGAAGAAAAAGAGTAAAGGAATGATAAAGACCATGTTTTTATTGATCTCAGTATGGA  
CAATGAATTTCAAAGGGTACTGGCCCTAAGAAGTTTTCTATGGTGAATTAGCTCGTGC  
AACGAACAATTTTGTGAGGTACAGAAGCTTGGAGAAGGTGGATTTGGCGAAGTTTATG  
AAGTTTTATTGAAGGAATGTAATCATATGTTGCTGTTAAGAGAGTATCAAGCGGTTCTAA  
ACAAGGGATAAAGGAGTATGCATCAGAAGTGATGATCATCAGCCGATTAAGACACAGAA  
ATTTGGTTCAACTTATCGGTTGGTGCCATGAGAAAGGGAAGCTGCATCTTGTTTATGAAT  
TGATGCCTAATGGAAGCTTAGATAAACATCTTTTCAAAGAGAAGTCATTGTTGGTATGGG  
AAATCAGGTGGAATAATTGTTCAAGGATTGGCCTCGGCTTTGCTCTATTTACACGAAGAGT  
GGGAACAATGTGTAGTCCATAGGGACGTAAGGATATATGGCGCCTGAATGTGTTATGAATGAA  
TCAACGCTAAATTAGGCGATTTTGGTTTGGCTAGACTCGTTGATCATGAAAAAGGATCTC  
AAACAACAATGCTGGCGGGGACTGTAGGTTATATGGCGCCTGAATGTGTTATGAATGAA  
AAAGCTAGTAAGGAATCAGATGTGTACAGTTTTTGGAAATAGTGGCATTGGAATAGCAAGT  
GGAAGAAAATCAATAGATATTAAGCAGCAGAAGATCAAGTGAGATTGGTGAATGGATT  
TGAAATCTCTACGGAATTGGAAAGCTAGTTGAAGCAACTGATCCAAGATTGAATAAGATA  
TATAATGAGCAACAAATGGAGCGTTTAAATGGTTCTCGGTCTCTGGTGTGCTCATCCAGAC  
AACAACTCAGGCCATCAATAAGGCAAGCAATCCATGTTCTTAATTCTGAAGTTCAGCTA  
CCTATTCTTCCCTCAAGAAATGCCTGTTGCGACGTATTCTCCCCCTCCATTGAATATGTTTT  
CGCCTCCATTTTACATACTTATGAACTAAAACAGTGGGGAGTGAGCAGGAACAGACTA  
TGACTTACACTTATAACACTAAGTCCTCAAGTGTATACATCCTCAGCTGCTTCGTCAAC  
AAAATCACTTTTGTAA

---

>NbS00048421g0010.1

MVGFASISALKYYLVFLLIIIPFVTSLSFNFDSPNPNGQNVTYEEDAFSANGVIQLTKNQLDRG  
SGVSIGRATYFKTLHLWDKALTDIFITHFSFSINSQGRATAYGDGLAFFLAPAGSRIPENTTIGGS  
LGLTIDTQQLNNTSNHFVAVFDFTKNWDYDPQGDHVGIDINSMQSVVNLTFSSIPNGNRD  
AWISYNSTSKNLTVVFTGFRANSTVTVQQSLSHNLDLREYLPERVTFGFTGATGGLFALQSSIS  
SWNFTSSLEINDNITDPGVALPMPKPEETPSKSKLGLVIGLVSGGCVLVAVSVLALFVWRKR  
KLREDEDEDDDDSIDGSMADDEFERSTGPKKFLYSELARCTNNFAQEEKLGECCGGVYKGY  
LRESNSYVAVKRVSRGSRQGVKEFASEVRIISRLRHRHLVQLIGWCHEKRELLVYEFMPNG  
SLDFHLFKGKSHLTPIRYKIAQGLASALLYLHEEWEQCVVHRDIKSSNIMLDSNFNAKLGDF  
GLARLVDHEKGSQTTVLADSNCRPSIRQAIHVLNFEAPLPTLPPNMPVPTYCSPSKHLSSASF  
SSSYDTNGSRITEIQNSVTRDYTDSSNNTAASATSSPSASLLYSR

>NbS00048421g0010.1 Corrected; GenBank ID: KT225318

MVGFASISALKYYLVFLLIIIPFVTSLSFNFDSPNPNGQNVTYEEDAFSANGVIQLTKNQLDRG  
SGVSIGRATYFKTLHLWDKALTDIFITHFSFSINSQGRATAYGDGLAFFLAPAGSRIPENTTIGGS  
LGLTIDTQQLNNTSNHFVAVFDFTKNWDYDPQGDHVGIDINSMQSVVNLTFSSIPNGNRD  
AWISYNSTSKNLTVVFTGFRANSTVTVQQSLSHNLDLREYLPERVTFGFTGATGGLFALQSSIS  
SWNFTSSLEINDNITDPGVALPMPKPEETPSKSKLGLVIGLVSGGCVLVAVSVLALFVWRKR  
KLREDEDEDDDDSIDGSMADDEFERSTGPKKFLYSELARCTNNFAQEEKLGECCGGVYKGY  
LRESNSYVAVKRVSRGSRQGVKEFASEVRIISRLRHRHLVQLIGWCHEKRELLVYEFMPNG  
SLDFHLFKGKSHLTPIRYKIAQGLASALLYLHEEWEQCVVHRDIKSSNIMLDSNFNAKLGDF  
GLARLVDHEKGSQTTVLAGTMGYMAPECATTGKASKETDVYSFGIVALEIACGRRPIDRKA  
SDRQVNIVEVWWSLYGMGNLNEAADHKLSEFNEMEMKHLIVGLWCAHPDSNCRPSIRQA  
IHVLNFEAPLPTLPPNMPVPTYCSPSKHLSSASFSSSYDTNGSRITEIQNSVTRDYTDSSNNT  
AASATSSPSASLLYSR

>NbS00048421g0010.1 Corrected; GenBank ID: KT225318

ATGGTTGGTTTTGCCTCTATATCTGCTCTAAAATACTACCTTGTTTTTCTTCTCATCATAAT  
CCCATTTGTTACTTCACTATCCTTCAATTTTATGATAGTTTTAATCCCAATGGTCAGAATGTAA  
CATATGAGGAAGATGCTTTTTTCAAGCAATGGAGTAATTCAACTCACAAAAACCAGCTTG  
ATCGTGGTTCAGGAGTCAGCATAGGTCGAGCCACATATTTCAAGACTGCATCTTTGG  
GACAAGGCTTCTGGAATCTCACAGATTTTATTACTCATTCTCCTTTAGCATCAATTCAC  
AGGGCAGAACAGCTTATGGTGACGGTCTTGCCTTCTCCTCGCGCCTGCAGGTTCAAGA  
ATTCTGAAAACACAACCATAGGTGGCAGCCTTGGCCTTACAATTGATACTCAGCAACTT  
AATACATCGAATAATCATTTTGTGAGTGGAGTTTACACCTTTAAGAATTGGTATGATC  
CACAGGGTGTATGATGATGATGATCAACTCTATGCAATCTGTTGTTAATTTGACCT

GGTTTAGTAGCATTCCAAATGGTAATAGAACTGACGCCTGGATTAGCTATAACTCAACCT  
CGAAAAATCTTACTGTTGTCTTCACTGGTTTTAGAGCTAATTCCACTGTCCTGTCAGCA  
AAGCCTATCTCACAATCTTGATCTGAGGGAATATTTGCCAGAACGGGTCACTTTTGGCTT  
CACAGGTGCAACAGGAGGTCTCTTTGCGTTACAAAGCATCTCCTCTTGGAAATTTACGTC  
TTCTTTAGAAATTAATGACAACATAACAGATCCAGGGGTAGCCTTACCAATGCCAAAGCC  
AGAGGAGACTCCAAGCAAAAGTAAGCTAGGACTTGTGATTGGATTAGTATCTGGTGGTT  
GTGTTTTGGTTGCAGTATCTGTTTTGGCGTTGTTTGTATTTTGGAGAAAGAGGAAGTTGA  
GAGAAGATGAAGATGAAGATGATGATGATAGCATTGATGGTTCATGGCTGATGAATTTG  
AAAGAAGTACAGGACCGAAGAAGTTCCTCTACAGTGAGTTGGCTAGATGTACAATAACT  
TTGCGCAGGAAGAGAAGCTTGGGGAGGGTGGATTCGGGGGTGTTTATAAAGGATATCTC  
AGGGAATCCAATTCCTATGTTGCTGTTAAAAGGGTTTCAAGGGGGTCAAGGCAAGGAGT  
AAAAGAGTTCGCATCAGAAGTGAGGATCATTAGCCGGTAAAGACATAGACATTTGGTGCA  
ACTCATTGGTTGGTGCCATGAGAAAAGAGAAGTCTACTTGTATGAGTTTATGCCTAAT  
GGAAGCTTAGATTTCCATCTTTTCAAAGGAAAAAGCCATTTGACATGGCCAATAAGATAC  
AAGATTGCTCAAGGCTTGGCCTCAGCGTTGTTATATCTACACGAAGAATGGGAACAATGT  
GTGGTGCATAGGGACATAAAGTCGAGCAATATTATGTTGGATTCCAATTTCAATGCCAAA  
CTTGGGGATTTTGGTTTAGCTAGACTAGTTGACCATGAAAAGGGATCCCAAAACAACAGTT  
TTGGCAGGTACAATGGGCTACATGGCCCCGAATGTGCTACCACTGGGAAAGCTAGCAA  
GGAAACAGATGTCTATAGCTTTGGTATCGTCGCTTAGAAATAGCTTGTGGAAGAAGACC  
TATTGACCGTAAAGCTGAATCAGATCGTCAAGTAAACATTGTTGAGTGGGTTTTGGAGCCT  
TTATGGGATGGGAAATCTTAACGAAGCAGCTGATCATAAACTCTCACTAGAGTTCAATGA  
AATGGAGATGAAGCACTTGTTAATTGTTGGATTATGGTGTGCTCATCCAGATAGCAATTG  
TAGGCCTTCTATTAGGCAAGCAATTCATGTCCTTAATTTTGAAGCTCCATTGCCACCCT  
CCCTCAAACATGCCTGTTCCAACATATTGCAGTCCATCAAACATTTATCAAGTGCTTCA  
TTTTCATCATCATATGACACCAACGGATCTCGGATTACTGAAATACAGAAGTCAAGTACCA  
GAGACTACACTGATTCTTCAAATAACACAGCAGCTTCCGCTACATCTTCACCTCAGCAT  
CACTTCTATACTCACGTTGA

---

>NbS00051756g0005.1

MVVFASLSALKYHVFLIIIPFATSLSFNFDSEFRPSDQNIYERDAYPANGAIQLTTDLINRDINA  
TIGRATYSKLLHLWDKAVTDFSTHFSFSINSQGRARYGDGLAFFLAPVGSRIPEENTTRGGSLG  
LTSNTRRLNTSSNHFAVEFDYQNVQYDPKGDHVGIDINSMQSVNVWTFSSIPSGRRTYA  
WISYNSTSKNLTVVFTGFKLQGNNTVTVLQSLSHNLDLREYLPEWVTFGFTGGAGIVFALQSI  
YSWNFTSSLEINDNITIPGVVLPSPKPEHAQSKNKLGLVVGLVSGGCVLVFCVLMFAYWR  
KRKLREDEDNDIFDGSMTHEFERSTGPKKFLYKELARCTKSFAHEKKLGEFGFVYKGF  
RESNSYVAVKRISRESKQGIKEYASEVRIISRLRHRHLVQLIGWCHEKRELLLVYEFMPNGSL  
DFHLFKGKIQLTWPIRYKIAQGLASALLYLHEEWEQCVVHRDIKSSNIMLDSNFNAKLDFGL  
ARLVDHEKGSQTTVLADSKCRPSIRQAIHVLNFEAPLPTLPPNMPVPTYCSPSQLLPTSSLSS  
SYETNGHEIIVAIQIYSVNRDNTDSSNNTTASAASSSSASMLYP

>NbS00051756g0005.1 Corrected; GenBank ID: KT225319

MVVFASLSALKYHVFLIIIPFATSLSFNFDSEFRPSDQNIYERDAYPANGAIQLTTDLINRDINA  
TIGRATYSKLLHLWDKAVTDFSTHFSFSINSQGRARYGDGLAFFLAPVGSRIPEENTTRGGSLG  
LTSNTRRLNTSSNHFAVEFDYQNVQYDPKGDHVGIDINSMQSVNVWTFSSIPSGRRTYA  
WISYNSTSKNLTVVFTGFKLQGNNTVTVLQSLSHNLDLREYLPEWVTFGFTGGAGIVFALQSI  
YSWNFTSSLEINDNITIPGVVLPSPKPEHAQSKNKLGLVVGLVSGGCVLVFCVLMFAYWR  
KRKLREDEDNDIFDGSMTHEFERSTGPKKFLYKELARCTKSFAHEKKLGEFGFVYKGF  
RESNSYVAVKRISRESKQGIKEYASEVRIISRLRHRHLVQLIGWCHEKRELLLVYEFMPNGSL  
DFHLFKGKIQLTWPIRYKIAQGLASALLYLHEEWEQCVVHRDIKSSNIMLDSNFNAKLDFGL  
ARLVDHEKGSQTTVLADSKCRPSIRQAIHVLNFEAPLPTLPPNMPVPTYCSPSQLLPTSSLSS  
SYETNGHEIIVAIQIYSVNRDNTDSSNNTTASAASSSSASMLYPR

>NbS00051756g0005.1 Corrected; GenBank ID: KT225319

ATGGTTGTTTTTGCCTCTTTATCTGCTCTCAAATACCATGTTTTTCTTCTTATCATAATCCC  
CTTTGCGACTTCGCTGTCCTTCAATTTTGTAGTATTTAGACCCAGCGATCAAATATAACA  
TACGAGAGAGATGCTTATCCAGCAAATGGTGCAATCAACTACCACAGACCTTATCAAT  
CGTGATATAAACGCAACTATAGGTGAGCCACATATCCAAGCTTCTGCATCTTTGGGAC  
AAGGCCTCAGGAAATGTCACAGATTTCACTACTCACTTCTCCTTTAGCATCAATTCACAA



GGCAGAGCAAGATATGGTGTGGTCTTGCCTTCTTCCTCGCACCTGTAGGTTCAAGAATT  
CCTGAGAACACAACCAGAGGTGGCAGTCTTGGCCTTACAAGTAATACTCGACGACTGAA  
TACATCGAGCAATCATTTTGTAGCTGTGGAGTTTGTACGTATCAGAACGTCCAGTATGA  
CCCAAAGGGTGATCATGTAGGTATTGATATCAACTCTATGCAATCTGTTGTTAATGTGAC  
CTGGTTTAGTAGCATTCCGAGTGGTAGGAGAACTTATGCCTGGATTAGCTATAACTCGAC  
TTCAAAAATCTTACTGTTGTCTTCACTGGTTTCAAACCTTCAAGGAAATACCACTGTCACG  
GTCCTGCAAAGCCTATCTCATAATCTTGATCTGAGAGAATACTTGCCTGAATGGGTCCT  
TTTGGCTTACAGGTGGAGCTGGAATTGTCTTTCATTACAAAAGTATCTATTCTTGGAACT  
TACTTCTTATTAGAAATTAACGACAACATAACAATTCAGGAGTAGTCTTACCAAGCCC  
CAAGCCAGAGCATGCACAGAGTAAAAACAAGTTAGGACTTGTGGTTGGATTGGTTTCTG  
GTGGTTGTGTTTTGGTTTTGTATGTGTTTTGATGTTGTTTGCATATTGGAGAAAGAGGAA  
GCTGAGAGAAGATGAAGACAATGACATCTTTGATGGATCCATGACTCATGAATTTGAAAG  
AAGCACAGGACCAAAGAAGTTCCTTTACAAAGAGTTGGCTAGATGTACAAAAGCTTTGC  
GCATGAAAAGAAGCTCGGGGAGGGTGGTTTTGGAGGTGTTTATAAAGGATTTCTCAGGG  
AATCCAATTCCTATTGTTGCTGTTAAGAGGATTTCAAGGGAGTCAAAGCAAGGAATAAAG  
AGTATGCATCAGAAGTGAGGATCATCAGCCGGCTAAGACATAGACATCTGGTGCAACTC  
ATTGGCTGGTGTGCATGAGAAAAGAGAACTACTACTTGTCTATGAGTTTATGCCTAACGGA  
AGCCTAGATTTCCATCTTTTCAAGGGAAAAATCCAGTTGACATGGCCAATAAGATAAAG  
ATTGCTCAAGGCTTGGCCTCAGCATTGCTATATCTACACGAAGAATGGGAACAATGTGTG  
GTGCATAGGGACATAAAGTCAAGCAATATTATGTTGGATTCCAATTTCAATGCAAAACTTG  
GGGATTTTGGTTTAGCTAGACTAGTTGACCATGAAAAGGGATCCCAAACAACAGTTTTGG  
CAGGTACAAGGGGCTACATGGCCCCGGAATGTTTCATCACTGGCAAAGCGAGCAAGGA  
AACAGATGTCTATAGCTTTGGTGTGTCGCGTTAGAAATAGCTTGTGGAAGGAAAGCTAT  
TGATCCTAAAGCTGAAGAACATCAAGAAAACCTTGTGATTGGGTTTGGAGCCTTTACGG  
GATGGGAAATCTTAATGAAGCAGCTGATCCTAACTCTCATCAGAGTTCAATGAAATGGA  
GATGAAGCACTTGTTAATTGTTGGCTTATGGTGTGCTCATCCAGATAGCAAATGCAGGCC  
TTCTATTAGGCAAGCAATTCACGTCCTTAATTTGAAGCTCCATTGCCACCCCTCCCTCC  
AAACATGCCTGTGCCAACATATTGCAGTCCATCACAACACTACTACCAACTTCTTCATTGTCA  
TCATCGTATGAAACCAATGGTCATGAGATCATTGTGCCCCAGATCCAGTATTAGTGAAC  
AGAGACAACACTGATTCTTCGAACAACACAACAGCTTCTGCAGCGTCTTCATCTTCAGCT  
TCAATGTTGTACCCACGTTGA

---

>NbS00037263g0008.1

YNSGRNLT CWGSVTAANETLNLTPDQPQNN SNKVGRVLF SQSLPIWPASFSTIFTIRILTNQS  
ISGDGMAFLIAQDDKPSPPDSYGSFIGILDPSTQGGALHQLAVEFD TYRNEGEIDGDHFAIVTT  
NMESP VAVKSLNAIGIDLKSGRNITIKIDYD GWAKVLDISAAYAGQTPVKFLS QEIIMQETVPQ  
NAYVGF SASTAYF SELHQVLNWNFTLYELPERSLKYGPDP EKEKIAL LVAIPVVVSLAVTVS  
FLIVARKDRKERLQRKEDIEMLRTRTAANAPQMFTYRRLSNATKNFSKDNLLGTGGFGSVYK  
GFSDPPTTIAVKRTNATSNQDGILAEICTIGRLRHKNLVQLHGWCHDREKLLLIYEYMPNGSL  
DKYIGKIFLDWDTRFKILSGLASALVYLHEECGNPIVHRDVKPNNVMLDSEYNAHLGDFGLAR  
LLQNFENFVTTM VAGTPGYLAPEVSYTGRATPESDVYSFGMVVLEVVCGRRSKGIMEENSLV  
ECVWSSYEKGALLECMDQKLDGNFDNAEAMRCLITGLACLHPDSILRPKMRKVQVFMNPD  
EPLMKLPESRPSVVCVSWNSCTCSTMTIAEDYAPGGVNMEIIPDEVTVSYEYAYETKK

>NbS00037263g0008.1 Corrected; GenBank ID: KT225320

MLRLLIILVLLNQFVLFVESYNFSFSSFDVGSYNSGRNLT CWGSVTAANETLNLTPDQPQNN  
SNKVGRVLF SQSLPIWPASFSTIFTIRILTNQSISGDGMAFLIAQDDKPSPPDSYGSFIGILDPS  
TQGGALHQLAVEFD TYRNEGEIDGDHFAIVTTNMESP VAVKSLNAIGIDLKSGRNITIKIDYD  
GWAKVLDISAAYAGQTPVKFLS QEIIMQETVPQNA YVGF SASTAYF SELHQVLNWNFTLYELP  
E RSLKYGPDP EKEKIAL LVAIPVVVSLAVTVSFLIVARKDRKERLQRKEDIEMLRTRTAANAPQM  
FTYRRLSNATKNFSKDNLLGTGGFGSVYKGFSDPPTTIAVKRTNATSNQDGILAEICTIGRL  
RHKNLVQLHGWCHDREKLLLIYEYMPNGSLDKYIGKIFLDWDTRFKILSGLASALVYLHEECG  
NPIVHRDVKPNNVMLDSEYNAHLGDFGLARLLQNFENFVTTM VAGTPGYLAPEVSYTGRATP  
ESDVYSFGMVVLEVVCGRRSKGIMEENSLVECVWSSYEKGALLECMDQKLDGNFDNAEAM  
RCLITGLACLHPDSILRPKMRKVQVFMNPD EPLMKLPESRPSVVCVSWNSCTCSTMTIAED  
YAPGGVNMEIIPDEVTVSYEYAYETKK

>NbS00037263g0008.1 Corrected; GenBank ID: KT225320

ATGTTAAGGCTTCTAATTATTCTAGTCTTGCTTAATCAATTCTCAGTTCTATTTGTTGAATC  
CTACAACTTTTCTTTTCTTCAATTTGATGTTGGTAGTTACAGTAACGGCAGAACTTAACA

TGCTGGGGATCTGTCACCTGCTGCTAATGAAACGCTTAACCTCACACCTGATCAGCCGCA  
AAACAATTCTAACAAAGTTGGAAGAGTGTGTTTCAGTCAATCCTTACCTATATGGCCTGCT  
TCTTTTTCCACCATATTCACTATAAGGATTTTGACAAATCAATCCATTTCTGGTGATGGAA  
TGGCATTCTCATTGCTCAAGACGATAAGCCTTCCCACCGGATAGTTATGGCTCGTTTA  
TTGGAATTCTTGATCCATCAACTCAAGGTCAGCTCCTAGTATATAAATTGGACTTAAAGTT  
GGTTCTTTTTCAATTCCTGATCCATCACTTCTCAGACTTTCTTTTAAATATGCAGGGGG  
CGCGCTTCATCAGCTTGCTGTGGAGTTTGATACATATAGAAATGAAGGCGAAATTGATGG  
AGATCATTTTGTATTGTGACTACAAATATGGAGAGTCCTGTGGCTGTTAAAAGCTTAAAT  
GCTATTGGGATTGATCTAAAGAGTGGAAAGAAATATCACAATCAAGATTGACTATGATGGA  
TGGGCTAAAGTTCTTGATATTTCTGCAGCATATGCAGGACAAACTCCAGTGAATTTCTA  
AGCCAAGAAATCATCATGCAAGAAACAGTTCCACAAAATGCTTATGTTGGATTTTCAGCTT  
CCACTGCTTATTTCTCAGAGTTACATCAAGTTCTCAACTGGAATTTACATTGTATGAATT  
ACCAGAAAGATCTCTAAAGTATGGCCCTGATCCAGAAAAGGAAAAGATAGCTCTACTGCT  
TGCTATTCCTGTGGTAGTTGTCTCGTTAGCTGTGACTGTATCGTTTCTCATTGTAGCTCGT  
AAGGATAGAAAAGAAAGACTTCAGAGGAAAGAGGACATTGAAATGCTAACAAAGAACTGC  
AGCCAATGCTCCTCAAATGTTTACTTACCGGAGACTTTCCAACGCTACTAAAACTTCAG  
CAAAGATAACCTATTGGGAACTGGAGGTTTTGGGAGCGTTTACAAAGGAGTGTTCCTGA  
TCCTCCAACAACTATAGCTGTTAAACGAACCAACGCAACATCTAATCAAGGTTTGTTC  
ATTAAGTTCCCCTAAATATAAGTCGATAGGCACTATTACTAAAATTTCAAATTACCTAGTAA  
TATTTATAATTAAGCTGTTATGGTTTTTATACTAGGTGAGACGGAATTTGGCTGAAATAT  
GTACAATTGGGCGCCTAAGGCACAAAACCTTAGTGCACTTACATGGTTGGTGCCATGAC  
CGCGAGAACTCCTATTAATATATGAGTATATGCCTAATGGAAGTCTTGATAAATACATTG  
GCAAAATCTTTCTTGATTGGGATACCAGATTCAAGATTTTATCAGGATTGGCATCAGCACT  
AGTGTATCTTCATGAAGAATGTGGAAATCCTATAGTACATCGAGACGTTAAGCCAAACAA  
TGTGATGTTAGACTCTGAGTATAATGCTCACTTGGGCGATTTTGGGCTAGCAAGATTACT  
CCAAAATGAGAACTTTGTTACAACAATGGTGGCTGGCACTCCAGGATACTTAGCCCCGG  
AAGTTAGCTACACGGGGAGGGCTACCCCCGAATCTGATGTCTACAGCTTTGGTATGGTT  
GTTTTAGAAGTGGTTTGTGGACGACGATCAAAGGGATCATGGAAGAAAATAGCTTGGT  
GGAATGTGATGGAGTTCATATGAGAAAGGTGCATTATTGGAATGTATGGACCAAAAACCT  
TGACGGAAATTTTGATAATGCGGAAGCTATGAGGTGTTTGATCACTGGATTAGCATGTTT  
ACACCCTGACAGTATTCTCCGGCCTAAAATGAGAAAAGTGGTGAAGTGTTCATGAATCC  
TGATGAGCCATTGATGAAATTGCCCGAGTCTCGGCCTAGTGTGTTGTGTGTCATGGAA  
TTCTTGACGTGTTCAACGATGACAATAGCAGAAGACTATGCCCTGGTGGCGTTAACAT  
GGAGATCATTCCCGATGAGGTGACAGTCTCATATGAATATGCTTATGAAACAAAGAAATA  
G

---

>NbS00001559g0001.1 GenBank ID: KT225321  
MLPILFILINLTIFQSISALDFLNSFTTNSTPVLHLIDDARLEPPVIRLTNDSNQFSRGRAFYPSP  
PIRSTSNSTSISSSFSTQFIFSILPDDPSSPGFGLAFVLSASTSPPNALSSQYFGLFTNATVHT  
VAPLLAVEFDTRNPEFNPDPRNHVGDILNRIESVVTQTAGYYNSGTDSEFVPLNMRSGQNIH  
WVIEFNGPEFEIDVTIAPAGMSRPAKTMLSYKSPIIANYSADMVGFSAASKTQWIEAQRLLA  
WSFSDSGVARDINTTNLPVFQLENSTSSSLSSGAIAGIVIGCVVAVLGLCLVFFFWWKKRG  
KEEEDVIEDWELEYWPHRFSYEELNLATKGFSDKDELLGAGGFVKVYKILSNNTAVKCVN  
HDSRQGIREFMAEISTIGRLQHKNLVQMRGWCRKGNELMIVYDYMPNGSLNKWIFDKPEKV  
MNWLDRRKVLTDVAEGLNYLHHGWEQVVVHRDIKSSNVLLDCEMRGRLGDFGLAKLYTHG  
GVPNTTRVVGTLGYLAPEVVTRATPTAASDVYSFGVVVLEVACGRRPIDAGFMVEEEVLD  
WVRQKYREGRLCEAADDRIRGQYSEDEMEAMLKGLTCHPDPLRRPTMREVVAVLLGEN  
VEATQNELLAELTPTVSSMKDRSNSASDEGDKYLSESELLSAV

>NbS00001559g0001.1 GenBank ID: KT225321  
ATGCTACCAACTGTTTCACTTCTCATCAATCTTACAATTTTCCAATCTATTTCTGCTCTCGA  
TTTTCTCTTCAATTCCTTCACTACCAACTCAACCCAGTCCTACACCTCATCGACGATGCT  
CGCCTTGAGCCACCAGTGATCCGCCTACCAACGACTCCAACCAATTTTCCCGTGGCCG  
TGCTTTTTACCCATCTCCAATTCCTATCAGATCAACTTCCAATTCCTACTTCCATTTCTCCT  
CTTTCTCTACCCAATTCATCTTCTCTATTCTCCCCGATGATCCCTCTAGTCCCTGGTTTCGG  
CCTTGCTTTTGTCTTTTCAGCTTCCACTTCCCACCCAACGCTCTCTCAAGTCAATACTTT  
GGACTTTTCACTAACGCCACCGTTCATACCGTTGCCCACTTCTCGCCGTCGAGTTTGAT  
ACGGGTCGTAACCCGGAATTCATGATCCGGATAGAAACCATGTCGGGATTGATCTTAA  
CAGAATCGAATCTGTTGTTACTCAAACGGCTGGATATTATAATTCTTCTGGTAATGGTACT  
GATTCCTTCGTGCCTCTAAATATGCGAAGTGGTCAAAAATATTTCATGTTTGGATCGAGTTCA

ATGGGCCTGAATTCGAGATTGATGTTACTATAGCTCCAGCTGGTATGTCACGGCCTGCTA  
AGACTATGTTAAGTTATAAAAAGCCCCATAATTGCAAATTACACATCTGCTGATATGTTTGT  
CGGGTTCTCTGCTTCCAAGACTCAATGGATTGAGGCACAAAGACTTTTTAGCTTGGAGTTT  
TAGTGATTCTGGAGTTGCAAGGGATATTAATACTACGAATTTGCCTGTTTTTCAGCTGGA  
GAATTCGACGTCTTCTTCGTTATCTTCCGGTGCTATTGCTGGAATTGTAATTGTTGTGTA  
GTGGCAGTGTTAGGTTGTTTGTGTGATTTTTATTTTTTTTTGGTGGAAGAAAAGGGGTAAG  
GAGGAAGAGGATGTAATTGAAGATTGGGAAGTTGAGTATTGGCCTCATAGATTTTCATAC  
GAAGAGCTTAACCTAGCTACAAAAGGGTCTCTAAGGATGAGCTACTTGGGGCTGGTGG  
ATTTGGTAAAGTATATAAGGGAATACTATCTAATAACACAGAAGTGGCAGTGAAATGTGT  
GAACCATGACTCAAGACAAGGAATAAGAGAATTCATGGCTGAGATATCGACTATCGGAA  
GGCTTCAACACAAGAATTTAGTACAAATGAGAGGGTGGTGTAGGAAGGGAAATGAACTT  
ATGATTGTGTATGATTATATGCCTAATGGAAGTCTGAATAAATGGATATTTGATAAGCCAG  
AGAAGGTTATGAATTGGCTAGACAGGAGGAAGGTCCTAACTGATGTTGCTGAGGGTTTA  
AACTATTTACATCATGGTTGGGAACAAGTGGTTGTACATAGGGATATTAATCTAGCAAT  
GTCTTGTTAGATTGTGAAATGAGAGGGAGACTGGGAGATTTCCGGCTAGCAAAGTTATA  
CACTCACGGTGGTGTACCAAATACAACCTAGGGTAGTAGGTACATTAGGGTACTTGGCAC  
CTGAAGTTGTGACAAGGGCTACACCAACTGCAGCTAGTGATGTTTATAGTTTTGGGGTG  
GTGGTGTGGAAAGTGGCATGCGGGCGTAGGCCGATTGACGCAGGGTTTATGGTGGAGG  
AAGAGGAAGTGTGATTGATTGGGTTAGACAAAAGTACAGGGAAGGGAGATTGTGTGAG  
GCAGCAGATGATAGGATTAGGGGGCAGTATTCGGAGGACGAAATGGAAGCTATGTTGAA  
ACTAGGCCTAACTTGTGTCACCCGGATCCTCTCCGACGACCTACTATGAGAGAGGTGG  
TTGCTGTATTGCTTGGTGAGAATGTGGAGGCAACACAAAATGAACTGCTAGCTGAATTA  
CACCCACTGTCAGCAGCATGAAAGATAGAAGCAATAGTGCAAGTGACGAAGGAGATAAA  
TACTTGTGCAAGAATCGGAACCTACTATCGGCAGTGTAG

>NbS00015570g0009.1

MSRTVFSEHEFVYNGFNIAASYLSVNGIAEIEKTGALRLTNETSRTVGHAFYKSAIKFNFPN  
RKVSSFSTAFAGFVPEYAKLGGHGFIFTISRKDMKGALPSQYLGLLNSSDIGNFSNHLFAV  
EFDTVQDFEFGDISDNHVGIDINNLKSNASCCKTIQAWIDYDSNRNVLNVTLSLSSVKPNYSIL  
SFPVDLSPILEEFMYVGFSASTGLLASSHYIFGWSFKMNGKAQSLDLDLLPNLPGPKDQTTL  
IVATSLSAVVFLAFGVVLALYIIWKIKNMDEIEPWELEIGPHRFSYKELKKATRDFRDKELLGFG  
GFRVYKGTLPKTSTEA AVKRINHDAKQGLQEFVSEIATIGRLRHRNLVQLIGWCRRKGDLLL  
VYDFMPNGSLDKYIYDEPRIILTWDQRFKIIKGVASGLLYLHEEWEQTVIHRDIKAGNVLLDAE  
MNGRLGDFGLAKLYEHGANPSTTRVVGTLGYLAPELTKTGKPTTSSDVFAFGALLLEVACGR  
RPIEAKALPEELILVDWVWDKWKEGAILEVDPRLNSKYDEMEAVVVLKGLMCSNNTPSKR  
PSMRLVVRYLEGEVALPEMLAAPDEYEGKKGASGMGFEDFEHSYPSSSYFEKVSTWSSV  
YDGEDIDIEANAITPLTDSGREDSR

>NbS00015570g0009.1 Corrected; GenBank ID: KT225322

MAKNTSLIFFLVFLILMSRTVFSEHEFVYNGFNIAASYLSVNGIAEIEKTGALRLTNETSRTV  
GHAFYKSAIKFNFPNRKVSSFSTAFAGFVPEYAKLGGHGFIFTISRKDMKGALPSQYLGLL  
NSSDIGNFSNHLFAVEFDTVQDFEFGDISDNHVGIDINNLKSNASVNASYFSEGNSTKQKFL  
QCGKTIQAWIDYDSNRNVLNVTLSLSSVKPNYSILSFPVDLSPILEEFMYVGFSASTGLLASSH  
YIFGWSFKMNGKAQSLDLDLLPNLPGPKDQTTLIVATSLSAVVFLAFGVVLALYIIWKIKNMD  
EIEPWELEIGPHRFSYKELKKATRDFRDKELLGFGGFRVYKGTLPKTSTEA AVKRINHDAKQ  
GLQEFVSEIATIGRLRHRNLVQLIGWCRRKGDLLLVDYDFMPNGSLDKYIYDEPRIILTWDQRF  
KIIKGVASGLLYLHEEWEQTVIHRDIKAGNVLLDAEMNGRLGDFGLAKLYEHGANPSTTRVVG  
TLGYLAPELTKTGKPTTSSDVFAFGALLLEVACGRRPIEAKALPEELILVDWVWDKWKEGAIL  
EVVDPRLNSKYDEMEAVVVLKGLMCSNNTPSKRPSMRLVVRYLEGEVALPEMLAAPDEYE  
GKKGASGMGFEDFEHSYPSSSYFEKVSTWSSVYDGEDIDIEANAITPLTDSGREDSR

>NbS00015570g0009.1 Corrected; GenBank ID: KT225322

ATGGCTAAAATACTAGTCTAATATTTTTCTTGGTATTTCTTATTTTGATGTCAAGAACAGT  
TTTTCTGAACATGAATTTGTTTACAACGGTTTTAATGGTATTGCAGCAAGTTATTTAAGTG  
TAAATGGTATAGCTGAGATTGAAAAAAGTGGTCTAAGGCTAACAAATGAAACATCAA  
GAACAGTTGGTCATGCCTTTTACAAAAGTGCATCAAAATCAAGAATTTCCCAAATAGGAA  
AGTTTCTTCAATTTCTACTGCTTTTGGTATTGTTCCAGAATATGCTAAATTAGGT  
GGCCATGGTTTTGCTTTCACAATTTCAAGGTCTAAGATATGAAAGGTGCTCTTCCTAGT  
CAGTATTTAGGTCTTTTAAATTTCTAGTGATATTGGTAATTTTTCAAATCATTTATTTGCTGT  
TGAATTTGATACTGTTCAAGATTTTGGTATTGATATTAGTGATAATCATGTTGGTATT

GATATCAATAATTTAAAGTCTAATGCTTCAGTTAATGCTAGCTATTTTTCTGAAGGAAATTC  
TACTAAGCAAAGCTTTTTCTTCAGTGTGGTAAGACAATTCAGGCTTGGATTGACTATGAT  
TCAAATAGAAATGTAAGTACTGTTACACTCTCACTATCTTCAGTAAAACCAAATTATTCAAT  
TTTTGTCAATTTCCAGTTGACCTTTACCAATTCTTGAGGAGTTTATGTATGTTGGATTTCT  
GCTTCTACTGGTTTGCTTGCTAGTTCACATTATATATTTGGTTGGAGTTTCAAATGAATG  
GAAAAGCTCAATCTTTGGATCTTGATTTATTGCCTAATTTACCTGGACCTAAGAAGGATCA  
AACAACTTAATTGTAGCGACGTCATTATCTGCTGTCGTCTTTCTTGCAATTTGGTGTGTT  
TTGGCCTTGTACATCAATTTGGAAAATCAAGAACATGGATGAGATTGAGCCTTGGGAAGCTT  
GAAATAGGTCACATAGGTTTTCTGATAAGGAGTTAAAGAAAGCTACAAGGGATTTTGA  
GATAAGGAGTTACTTGGATTTGGTGGATTTGGTTCGAGTTTATAAAGGAACGTTGCCTAAG  
ACTAGTACCGAGGCTGCTGTTAAGCGAATAAATCATGATGCAAACAAGGTCTCCAAGAA  
TTTGTGTCTGAAATCGCTACTATTGGTCGCCTTAGACATAGGAATTTGGTTGAGCTTATAG  
GGTGGTGTGCGACGAAAAGGTGACTTGTACTTGTATGACTTTATGCCTAATGGAAGCT  
TAGACAAGTACATTTATGATGAGCCAAGAATCATTTTAAACGTGGGATCAGCGATTCAAGA  
TTATCAAAGGTGTGGCTTCGGGGCTGTTGATTTACATGAAGAATGGGAACAACTGTAA  
TCCATAGAGATATCAAAGCAGGGAATGTGTTATTAGATGCGGAAATGAATGGACGACTTG  
GAGATTTTGGACTTGCCAAGTTATATGAGCACGGGGCAAATCCTAGCACAAACACGAGTA  
GTGGGCACGTTGGGTTACTTAGCTCCAGAATTAACCAAGACTGGAAAGCCTACAACAAG  
CTCGGATGTTTTTGCCTTTGGTGCATTGCTGCTAGAAAGTTGCTTGTGGAAGGAGGCCTAT  
CGAGGCAAAGCATTGCCCGAGGAGTTAATTTTAGTTGATTGGGTTTGGGATAAATGGAA  
GGAAGGTGCCATTCTGAAGTGGTTGATCCGAGGTTAAACAGCAAGTACGATGAGATGG  
AGGCTGTGGTGGTGTAAATTAGGACTGATGTGTTCAAATAATACACCATCTAAGAGAC  
CTAGCATGAGGTTAGTGGTGAATACTTGGAGGGGGAAGTAGCTCTGCCGGAGATGCT  
GGCAGCGCCCGATGAATATGAAGGGAAAAAAGGCGGCGCTAGTGGTATGGGGTTTGGAG  
GACTTTGAACATTCATATCCATCCTCGTCTTATTTTGAAGAAAGTAAGTACCTGGTCATCGG  
TTTATGATGGTGAAGGAGATATTGACATTGAAGCTAATGCGATAACGCCGTTAACGGATT  
CTGGCAGAGAGGACAGCAGATAG

>NbS00002771g0001.1

MAKDRI LIFL VFFILISRKVFS DQEFVYNGFN GIAASYLSVNGIAEIEKT GALRLTNETSRAVGH  
AFYKSAIKFKNFPNRKVSS FSTAFAGVPEYAKLGGHGF AFTISRSKDMK GALPSQYLGLLN  
SSDIGNFSNHLFAVEFD TVQDFEFGDISDNHVGIDINNLKSNASVNASCFSEGNSTKQKFLQ  
CGKTIQAWIDYDSNRNVLNVTLSLSSVKNYSILSFPVDLSPILEEFMYVGFSA STATSLSAVV  
FLAFGVILAFYIIWKIKNIDVIEPWELEIGPHRFGYKELKKSTRGFRDRELLGFGGFGRVYKGT  
PKTNM VVAVKRINHDAKQGLQEFVSEIATIGRLRHRNLVQLIGWCRQKGDLLL VYDFMPNGS  
LDKYIYDEPRVILTWDQRFKI IKGVASGLLYLHEEWEQTVIHRDIKAGNVLLDAEMNGRLGDF  
GLAKLYEHGANPSTTRVVGT LGYLAPELTKTKP TSSDVFAFGALLLEVTCGRRIEAKALP  
EELILVDWVWDKWKEGAILEVDPKLNGEYDDMEAVVVLKGLMCSNNTPSKRPSMRLVVR  
YLEGEMVLPETLAAPDEYDGKKG GASGMGFEDFVHSYPSSSYFEKVSTWSPAYDGE GDIDI  
EADPIKPLTDSGREDSR

>NbS00002771g0001.1 Corrected; GenBank ID: KT225323

MAKDRI LIFL VFFILISRKVFS DQEFVYNGFN GIAASYLSVNGIAEIEKT GALRLTNETSRAVGH  
AFYKSAIKFKNFPNRKVSS FSTAFAGVPEYAKLGGHGF AFTISRSKDMK GALPSQYLGLLN  
SSDIGNFSNHLFAVEFD TVQDFEFGDISDNHVGIDINNLKSNASVNASCFSEGNSTKQKFLQ  
CGKTIQAWIDYDSNRNVLNVTLSLSSVKNYSILSFPVDLSPILEEFMYVGFSA TGLLASHY  
IFGWSFKMNGKAQSLDLDLLPNLPGPKNQTTLIAATSLSAVVFLAFGVILAFYIIWKIKNIDVIE  
PWELEIGPHRFGYKELKKSTRGFRDRELLGFGGFGRVYKGTLPKTNM VVAVKRINHDAKQ  
LQEFVSEIATIGRLRHRNLVQLIGWCRQKGDLLL VYDFMPNGSLDKYIYDEPRVILTWDQRFKI  
IKGVASGLLYLHEEWEQTVIHRDIKAGNVLLDAEMNGRLGDFGLAKLYEHGANPSTTRVVGT  
LGYLAPELTKTKP TSSDVFAFGALLLEVTCGRRIEAKALPEELILVDWVWDKWKEGAILE  
VDPKLNGEYDDMEAVVVLKGLMCSNNTPSKRPSMRLVVRYLEGEMVLPETLAAPDEYDG  
KKGASGMGFEDFVHSYPSSSYFEKVSTWSPAYDGE GDIDIEADPIKPLTDSGREDSR

>NbS00002771g0001.1 Corrected; GenBank ID: KT225323

ATGGCTAAAGATATTAGACTAATATTTTTCTTGGTATTTTTATTTTGATATCAAGAAAAGT  
GTTTTCTGATCAAGAATTTGTTTACAATGGTTTTAATGGTATTGCAGCTAGTTATTTAAGTG  
TAAATGGTATAGCTGAGATAGAAAAAAGTGGTCTAAGGCTAACAAATGAAACATCAA  
GAGCAGTTGGTCATGCTTTTTACAAAAGTCAATCAAATTCAGAAATTTCCCAAATAGGAA  
GTTTTCTTCAATTTCTACTGCTTTTTGCTTTTGGGATTGTTCCAGAATATGCTAAATTAGGT

GGCCATGGTTTTGCTTTCACAATTTCAAGGTCTAAAGATATGAAAGGTGCTCTTCCTAGT  
CAGTATTTAGGTCTTTTAAATTTCAAGTGATATTGGTAATTTTTCAAATCATTTATTTGCTGT  
AGAATTTGATACTGTTCAAGATTTTGGATTTGGTATATTAGTGATAATCATGTTGGTATT  
GATATCAATAATTTAAAGTCTAATGCTTCAGTTAATGCTAGTTGCTTTTTCTGAAGGAAATT  
CTACTAAGCAGAAGCTTTTTCTCAGTGTGGCAAGACAATTCAGGCTTGGATTGACTATG  
ATTCAAATAGAAATGTAAGTGAATGTTACACTCTCGCTATCTTCAGTAAAACCAAATTTATTC  
AATTTTGTCAATTTCCAGTTGACCTTTACCAATTTCTGAGGAGTTTATGTATGTTGGATTTT  
CTGCTTCTACTGGTTTGGCTTGTAGTTACATTATATATTTGGTTGGAGTTTCAAATGAA  
TGAAAAGCTCAATCTTTGGATCTTGATTTATTGCCTAATTTACCTGGACCTAAGAAGAAT  
CAAACAACCTTAATTGCAGCGACGTCTTTATCTGCTGTCGTCTTTCTTGCAATTTGGTGTTA  
TTTTGGCGTTTTACATCATTTGGAAAATCAAGAACATAGATGTGATTGAGCCGTGGGAAC  
TTGAAATAGGTCCACATAGGTTTGGATACAAGGAGTTAAAGAAATCTACAAGGGGTTTTA  
GGGATAGGGAGTTACTTGGATTTGGTGGATTTGGTTCGAGTTTATAAAGGAACGTTGCCTA  
AGACTAATATGTTTGTGCTGTTAAGCGAATAAATCATGATGCAAAAACAAGGTCTCCAAG  
AATTTGTGCTGAAATCGCCACTATTGGTCGCCTTAGACATAGGAATTTGGTTCAGCTCA  
TTGGATGGTGTGACAAAAAGGTGACTTGTTACTTGTATGACTTTATGCCTAATGGAA  
GCTTAGACAAGTATATCTATGATGAACCAAGAGTCATTTAACGTGGGATCAGCGATTCA  
AGATTATCAAAGGTGTGGCTTCGGGGCTGCTGTATTTACATGAAGAATGGGAACAACT  
GTAATCCATAGAGATATCAAAGCAGGGAATGTGTTATTAGATGCAGAAATGAATGGACGA  
CTTGGAGATTTTGGACTTGCCAAGTTATATGAACATGGAGCAAATCCTAGCACGACAAGA  
GTAGTGGGCACGTTGGGTTACTTGGCTCCTGAATTAACCAAGACCGGAAAGCCTACAAC  
AAGCTCGGATGTTTTGCCTTTGGTGCATTGCTGCTAGAAGTTACTTGTGGAAGGAGGC  
CAATCGAGGCAAAGCATTACCCGAGGAGTTAATTTTAGTGGATTGGGTTTGGGATAAAT  
GGAAGGAAGGTGCCATTCTGAAGTGGTTGATCCGAAACTAATGGTGAAGTACGATGAT  
ATGGAGGCTGTGGTGGTCTTAAATTAGGACTAATGTGTTCAATAATACACCATCTAAG  
AGACCTAGCATGAGGCTAGTGGTAAGATACTTGAAGGGGAGATGGTGTGCTGCCGAGA  
CGTTGCAGCGCCCGATGAATATGATGGGAAAAAGGCGCGCTAGTGGTATGGGATTT  
GAGGACTTTGTACATTCATATCCATCCTCGTCTTATTTGAGAAAGTAAGCACGTGGTCA  
CCGGCTTATGATGGTGAAGGAGATATTGACATTGAAGCGGATCCGATAAAGCCGTTAAC  
GGATTCTGGCAGAGAGGACAGCAGGTAG

---

>NbS00043874g0006.1 GenBank ID: KT225324  
MYVGFSASTGLLASSHYILGWSFKLNGEAKFLDLDLPSLPGVKKKHAGLIIVISNAAAVFALS  
SILVAIYLCFRKNADVIEPWELEIGPHRYSYQELKQATRQFKDSELLGRGGFGKVYKILNSI  
TQIAVKRISHESKQGWCRRRGDLLLVDYDFMPNGSLDNFLFDQPKMVLWEQRFKIKGVASG  
LLYLHEGYEQVVHRDVKASNVLLDGELNGKLGDFGLARLYEHGNSNPCTTRVVGTLGYLAP  
ELPRTGRATTSDDVFAFGALLLEVVCRRPIDPKAEPEEFVLVDLVWDKLRGKILEVVDYRL  
KGEFNENEVLMMLKLGLMCSNNQPLARPSIRQVVRYLEGEILMPEAPTEQNADDRELFNEN  
ERWNSLGSANIIKSSSFTSLNGDEDDNFASFSTSPPLLYSGEAPRY

>NbS00043874g0006.1 GenBank ID: KT225324  
ATGTATGTTGGCTTCTCTGCTTCTACTGGTTTGGCTTGGCAGTTACATTACATTTTAGGTT  
GGAGTTTAAAGTAAATGGAGAAGCTAAATTTCTTAGACTTGGATTCTTTGCCATCACTTCC  
TGGAGTCAAGAAGAAACACGCTGGCCTAATTATAGTCATTTTCAATGCTGCAGCTGTTTT  
CGCGTTAAGCTCAATCTTGGTTGCTATTTATTTATTCTGCAGATTCAAGAATGCTGATGTG  
ATTGAGCCATGGGAGCTTGGAGATTGGTCTCACAGATATTCATATCAAGAATTAAGCAA  
GCTACTAGAGGTTTTAAGGACAGTGAAGTACTCGGACGTGGCGGATTTGGTAAAGTTTA  
CAAGGGTATTTTAAATTTCAATAACACAAATTTGCTGTGAAGCGCATTTTCGCATGAATCTAAA  
CAAGGTTTGCAGGAATTTGTGCTGAAATTTGATTGGAAGACTCCGTCATAGGAATTTGGT  
TCAATTTAGGGTGGTGTAGGCGTCTGGTACTTGTGCTTGTATGATTTTATGCC  
TAATGGAAGTTTGGATAATTTCTTGTGTTGATCAGCCGAAAATGGTATTAACCTTGGGAACAA  
AGTTCAAGATAATCAAAGGGGTTGCTTCTGGTTTATTGTACTTACATGAAGGCTATGAA  
CAAGTTGTGGTACATCGCGATGTTAAGGCTAGTAATGTGCTACTAGATGGGGAATTGAAC  
GGCAAGCTTGGGATTTTGGACTTGCAAGATTATATGAGCACGGATCAAATCCCTGCAC  
AACTAGAGTGGTAGGTACATTGGGGTACCTTGCAACGAAATTGCCAAGAACAGGACGGG  
CCACAACAAGTTCCGATGTGTTTGCCTTTGGTGTCTTGTACTCGAGGTAGTCTGTGGAC  
GTAGGCCAATTGATCCCAAGGCAGAACCCGAGGAGTTTGTACTGGTGGACTTGGTGTGG  
GATAAATTAAGAGAAGGGAAAATTTCTTGAAGTGGTGGACTATAGATTGAAAGGTGAATTC  
AATGAGAATGAGGTTTTGATGTTGTTAAATTTAGGACTAATGTGCTCAAATAACCAGCCAT  
TGGCACGACCGAGCATAAGGCAAGTGGTAAGATACTTGAAGGTGAAATTTCTGATGCCT

GAGGCTCCAACAGAGCAAATGCTGATGATCGAGAATTGGAGTTCAACGAAAATGAACG  
TTGGAATTCGTTAGGATCAGCTAATATTATCAAGTCAAGTTCATTTACAAGTTTGTCTAAT  
GGAGATGAAGATGATAATTTTCTCTTTTTCTACTTCACTTCCACTTCTATATAGTG  
GTGAAGCACCTAGATACTGA

>NbS00000505g0005.1

MTQVDYWVMPSSLFHFKNSSNETAFSSTCFafaivPEYPKLRCHGLVFTVSHSKDFSTAL  
PSQYLGLLNASDVGGHGLAFTVSHSKDFSTALPSQYLGLLNASDVGNFNSHIFAVEFDTVRD  
FEFGDINDNHVGNINSIQSNKSAAYNDELVKQDLNLKSGKVILAWVEYDSVKKLINVTL  
PTSLPKIPLFSYHLDLSPILKETTIVGFSASTGLLASSHYIFGWTFKLNGEVKFLDLDLPSLP  
GAKKKHTESSQLQLFKNADVIEPWELEIGPHRYSYQELKQATKGFKDESELLGRGGFGKVYN  
GILRNSKTQIAVKRRMNLKACRDFVSEIVSIGRLRHRNLVQLLWCRRRGDLLLVDMPN  
GSLDSFLDQPKMVLWEQRFKIIGVASALLYLHEGYEQVVHRDVKASNVLLDGELNGKL  
GDFGLARLYEHGNSNPCTTRVMGTLGYLAPELPRSRATTSSDVFAFGALLEVVCGRRSIEP  
KPLARPSIRQVIRYLEGEILMPEAPTEQNADDGELRFDENERWNSLRSTNIIKSSSFTSLANG  
DEDDTFASFSTSPPLLYSGEVRRY

>NbS00000505g0005.1 Corrected; GenBank ID: KT225325

MTQVDYWVMPSSLFHFKNSSNETAFSSTCFafaivPEYPKLRCHGLVFTVSHSKDFSTAL  
PSQYLGLLNASDVGNFNSHIFAVEFDTVRDFEFGDINDNHVGNINSIQSNKSAAYNDEL  
VKQDLNLKSGKVILAWVEYDSVKKLINVTLSPKPKIPLFSYHLDLSPILKETTIVGFSASTG  
LLASSHYIFGWTFKLNGEVKFLDLDLPSLPGAKKKHTESSQLQLFKNADVIEPWELEIGH  
RYSYQELKQATKGFKDESELLGRGGFGKVYNGILRNSKTQIAVKRRMNLKACRDFVSEIVSI  
GRLRHRNLVQLLWCRRRGDLLLVDMPNGSLDSFLDQPKMVLWEQRFKIIGVASAL  
LYLHEGYEQVVHRDVKASNVLLDGELNGKLGDFGLARLYEHGNSNPCTTRVMGTLGYLAPE  
LPRSRATTSSDVFAFGALLEVVCGRRSIEPKPLARPSIRQVIRYLEGEILMPEAPTEQNAD  
DGELRFDENERWNSLRSTNIIKSSSFTSLANGDEDDTFASFSTSPPLLYSGEVRRY

>NbS00000505g0005.1 Corrected; GenBank ID: KT225325

ATGACACAAGTAGACTATTGGGTCATGCCTTCTTCACTTTTCCACTTCAAGAACTCCAGTA  
GTAATGAACTGCCTTCTCTTCTCAACATGTTTTGCTTTCCGCATCGTCCCCGAGTATCC  
AAAACCTCAGGTGCCATGGCTTAGTATTCACTGTTTCTCACTCAAAGATTTCACTACAGCT  
CTACCAAGTCAGTATTTAGGTCTGCTTAATGCAAGTGATGTTGGTAATTTTCTAACCACA  
TTTTTGCTGTTGAATTCGACACGGTACGAGATTTGAGTTCGGAGATATTAATGATAATCA  
TGATGATTTAGTGAACAAGATTTGAATCTCAAAGTGAAAGGTTATTCTAGCTTGGGT  
AGAATATGATTCAGTCAAAAAATTAATTAATGTTACTCTTTCACCAACTTCTTTAAACCCA  
AAATCCTCTTTTTTCTTATCATTTAGACCTCTCTCCAATTCTTAAAGAACTACATATGTT  
GGTTTCTGCTTCTACTGGTTTGGTTGCAAGTTCACATTATATTTTGGTTGGACTTTTA  
AGTAAATGGAGAAGTAAATTTTACTTGGATTCTTGGCCATCACTTCTGGAGCCAA  
GAAGAAACACACTGAATCATCTCAATTGCTGCAGCTGTTTTCCGCATAAGCTTAATCTTG  
GTTGCTATTTATTTAATATGGAGATTCAAGAATGCTGATGTGATTGAGCCTTGGGAGCTT  
GAGATTGGTCCTCATAGATATTCATACCAAGAACTTAAGCAAGCTACTAAAGGTTTTAAG  
GACAGTGAACACTCGGACGTGGCGGATTTGGTAAAGTTTACAATGGTATTTTAAGAAAT  
TCAAAAACACAAATTGCAGTGAAGCGTCGCATGAATCTAAAAAAGGCTTGCAGGGATTTT  
GTGTCTGAAATTGTCAGCATTGGAAGACTCCGTCATAGGAATTTGGTTCAACTGTTAGGG  
TGGTGTAGGCGTCGAGGTGACTTGTACTTGTGTATGATTTTATGCCTAATGGAAGCTTG  
GATAGTTTCTTGTGATCAACCCAAAATGGTATTAATTTGGAACAAAGGTTCAAGATAA  
TCAAAGGGGTTGCTTCTGCTTTATTGATTTACATGAAGGCTATGAACAAGTTGTGGTAC  
ATCGAGACGTTAAGGCTAGTAATGTGCTACTAGATGGGGAAGTGAACGGCAAGCTTGGG  
GATTTTGGACTAGCAAGATTATGAGCACGGATCAAATCCGTGCACGACTAGGGTGT  
GGCACCTTGGGGTACCTTGCACCAGAATTGCCAAGATCAGGGCGGGCCACAACGAGT  
TCTGATGTGTTTGCCTTCCGTGCTTTGTTACTCGAGGTGGTATGTGGACGTAGGTCAATT  
GAACCAAGGTAGAATGGAGTTTGTACTAGTGGATTTGGTACGGGACAAATTAAGAGAA  
GGGAATGTTGATGATTACTCCTCACCCGGGGTGGGTGAGGCTTGGTAGGGCTATCCGT  
ACACGATTTGTGCATTGGTTTGTGTCTCCTTTAGTAGTTATTTATGATAGTTACTGTCTGA  
TATATTTGCATGCTATTTTATTTATGGTTCTTTGTTTAGATAATTTTACGTTATTTCTGT  
TGGAGTTACTAATGCTCTTTTGTGTTTTGTTTTGTTTTGTTTTGTTTTGTTTTCTTTT  
CTCCACTGAGCCGAGGGTGCATTGAAACAGCCTCTCTGCCCTTTCGGGTAGGGGTAA

GGCCCGTCTACATATTACCCTCTCAAACCCCTGGGACTATACTGGATAGTTATTGTTGTT  
GTTGTTGGAATGTTTCATGATGTGGTGGACTATAGATTGAAAGGTGAGTTC AATGAAAATG  
AGTTTTGGTGGTGTAAAATTAGGACTAATGTGCTCAAATAGCCAGCCATTGGCGCGAC  
CGAGCATAAGGCAAGTGATAAGATACTTGAAGGTGAAATTCTGATGCCTGAGGCTCCA  
ACAGAGCAAATGCTGATGATGGAGAATTGCGGTTGACGAAAATGAACGTTGGAATTC  
TTAAGATCAACTAATATTATCAAGTCAAGTTCATTTACAAGTTTGGCTAATGGAGATGAA  
GATGATACTTTTTGCTTCTTTTTCTACTTCACCACTTCCACTTCTATATAGTGGTGAAGTAC  
GTAGATACTGA

>NbS00056619g0001.1

MGHAFYSSPFQFKNSTTATAFSFSTCFALSIVPEYPKLGGHGLAFTISQSNLSTALPSQYLG  
LLNATDVGNFSNHIFAVEFDTVQDFEFRDINDNHVGVNINSLRSNMSVAAAAYFDDDLVKQDL  
NLKCGKVLAWVEYDSVKNLVNVTLSKSSKKPKLPLLSYHIDLSPFLKENMYVGFSASTGLLA  
SSHYIFGWSFKLNGEAQFLDLDLPLLPGPKKKHTGLILAIISVIFTLISILVGIYLIKKFKNADVI  
ESWELEVPHRYSYQELKQATRGFKDSELLGYGGFGKVYKGVSQNSKMQUIAVKRISHESKQ  
GLREFVSEISSIGRLRHRNLVQLVGVWCRRRGDLLLLVYDFMPNGSLDNFLFDKPRMVLSWEQ  
RFKIKGVASGLLYLHEGYEQVVVHRDVKASNVLDDGELNAKLGDFGLARLYEHGSNPCTTR  
VVGTLGYLAPELPRTRATEKSDVFAFGALLLEVVCGRRIPIESKAGPEELVLVDMVWNKMR  
EGKILDVIDKRLKGEFNEREVIVLKLGLMCSNNMREGKTLDDVIDKRLKGEFNEREVMVLKL  
GLMCSNNEALARPSMRQVMSYLEGEIEMPDPAMPVYNGGFGFDENELHSLASSRGHTY  
LANGDVDGTFVSISTAPMSCLFTDEVPR

>NbS00056619g0001.1 Corrected; GenBank ID: KT225326

MFQTPLEMVSLCLLLLCSLISSSIQLDGFTYTRFNQPNMNTLSGVAKISQNGFIQLTNETSRL  
MGHAFYSSPFQFKNSATGTAFSSTCFALSIVPEYPKLGGHGLAFTISQSNLSTALPSQYLG  
LLNATDVGNFSNHIFAVEFDTVQDFEFGDINDNHVGVNINSLRSDISAAAAAYFDDDLVKQDLN  
LKCGKVLAWVEYDSVKNLVNVTLSRSSLKPKLPLLSYHVDLSPFLKGNMYVGFSASTGLLAS  
SHYIFGWSFKLNGEAKFLDLDLPLLPGPKKKHTGLILAISTIAVVFTLISILVGIYLIKKFKNADVI  
ESWELEVPHRYSYQELKQATRGFKDSELLGFGGGFGKVYKGVLQNSKMEIAVKRISHESKQ  
GLREFVSEISSIGRLRHRNLVQLVGVWCRRRGDLLLLVYDFMPNGSLDNFLFDKPRMVLSWEQ  
RFKIKGVASGLLYLHEGYEQVVVHRDVKASNVLDDGELNAKLGDFGLARLYEHGSNPCTTR  
VVGTLGYLAPELPRTRATEKSDVFAFGALLLEVVCGRRIPIESKAGPEELVLVDMVWNKMR  
EGKILDVIDKRLKGEFNEREVIVLKLGLMCSNNEALARPSMRQVMSYLEGEIEMPDPAMP  
GVYNGGFGFDENELHSLASSRGHTYLANGDVDGTFVSISTAPMSCLFTDEVPR

>NbS00056619g0001.1 Corrected; GenBank ID: KT225326

ATGTTTCAAACCCATTAGAAATGGTCAGTTTATGTCTTCTACTACTCTGCTCTCTCATT  
CCTCCTCTATACAGCTTGATGGCTTTACCTACACAAGATTCAATCAACCAACAATAACAT  
GACCTTAAGTGGAGTTGCAAAAATAAGCCAAAATGGATTTATTCAGTTAACCAATGAAAC  
AAGTAGACTTATGGGTCATGCTTTCTATTCTTCACCTTTTCAGTTCAAGAACTCAGCTACA  
GGCACTGCTTTTTCTTTTTCAACATGTTTTGCTCTTTCTATAGTACCTGAATATCCAAAAC  
CGGTGGTCATGGACTTGCTTTTACCATTTCTCAATCCAATGATTTAAGCACAGCTCTACC  
AAGTCAGTATTTAGGTTTACTCAATGCTACTGATGTTGGTAATTTCTCTAATCATATATTTG  
CTGTTGAATTTGATACAGTACAAGATTTTGGAGATATTAATGATAATCATGTTGG  
TGTTAACATTAATAGTTTAAAGGTCTGATATCTCTGCTGCAGCTGCTTATTTTATGATGAT  
TTGGTAAAACAAGATCTGAATCTTAAATGTGGTAAGGTAATATTGGCATGGGTAGAATAT  
GATTCAGTTAAAAACTTGGTTAATGTTACTCTTTCAAGATCTTCTTAAAACCCAAGTTGC  
CACTTTTATCTTATCATGTAGATCTCTCTCATTCTCAAAGGAAATATGTATGTTGGTTTT  
TCTGCTTCAACTGGTTTGCTTAGTTCTCATTATATTTTTGGTTGGAGTTTTAAGTTGA  
ATGGTGAAGCCAAATTTCTAGACTTGGATTCATTCTTTATTGCCTGGTCCCAAGAAGA  
AGCACACTGGCTTAATTTTAGCTATCTCAACTATAGCTGTGTTTTTACATTGATTTCTATC  
TTAGTTGGTATTTATTTGATCAAGAAATCAAGAATGCTGATGTTATAGAGTCTTGGGAGC  
TTGAGGTTGGTCTCATAGATATTCTTATCAAGAACTTAAGCAAGCTACTAGAGGTTTTAA  
GGATAGTGAGCTTCTGGTTTTGGTGGATTTGGTAAAGTGTACAAGGGTGTTTTACAAA  
TTCAAAGATGGAATCGCTGTGAAGCGTATTTGCGCATGAATCTAAACAGGGTTTGC CGA  
GTTTGTGTCTGAAATTTCTAGCATTGGAAGACTTCGTCATAGGAATTTGGTTCAATTAGTA  
GGATGGTGCAGACGTCGTGGTGATTTGTTACTTGTCTATGATTTTATGCCTAATGGGAGC  
TTGGACAATTTCTTGTGATAAACCTAGAATGGTATTGTCTTGGGAGCAGAGGTTCAAG  
ATCATCAAAGGGGTTGCTTCAGGTTTACTATACTTACATGAAGGTTATGAACAAGTTGTG  
GTGCATCGAGACGTTAAGGCTAGTAATGTGTTGCTAGATGGTGAATTAATGCCAAGCTT

GGAGATTTTGGACTAGCAAGATTATATGAGCACGGATCAAACCCGTGCACGACTAGGGT  
AGTAGGCACATTGGGGTACCTTGCACCAGAATTGCCAAGAACGGGAAGGGCTACAGAAA  
AATCTGATGTCTTTGCCTTTGGTGCATTGTTGCTTGGAGTGGTGTGTGGGCGTAGGCCG  
ATTGAGTCAAAGGCAGGGCCCGAGGAGTTAGTCTTAGTGGATATGGTATGGAACAAAAT  
GAGAGAAGGGAAAATTCTTGATGTTATCGACAAGAGATTGAAAGGTGAGTTCAATGAACG  
TGAAGTTGTGATTGTATTGAAATTGGGACTAATGTGTTCAAACAATGAAGCGTTGGCGCG  
GCCTAGCATGAGACAAGTGATGAGTTATTTGGAAGGTGAAATTGAAATGCCAGATGCTC  
CAATGGCTCCTGGTGTATAATGGAGGATTTGGATTCGACGAAAATGAACTGCATTCTT  
TAGCATCTTCAAGAGGACACACATATTTGGCTAATGGAGATGTAGATGGTACATTTGTTT  
CTATTTCTACTGCACCAATGTCATGTTTATTTACTGATGAAGTACCTAGGTAG

---

>NbS00027351g0001.1

MGHAFHSSPFQFKNSTTGTAFSFSTCFALAIVPEYPELVGHGLAFTISQSNLSTLPLPSQ  
YLGLLNATDVGNFNSHFVAVFEDTVQDFEFGNINDNIVGVKINSLRSNMSVAAAYFDDDLVKQ  
DLKMS

>NbS00027351g0001.1 Corrected; GenBank ID: KT225327

MVSLCLLLLCSLISPSIQLDGFIHTRFNQPNMNLGVAEINQNGFIQLTNETSRLMGHAFYS  
SPFQFKNSTTATAFSFSTCFALSIVPEYPKLGGHGLAFTISQSNLSTALPSQYLGLLNATDV  
GNFSNHIFAVEFDTVQDFEFRDINDNHVGVNINSLRSNMSVAAAYFDDDLVKQDLNLKCGKVI  
LAWVEYDSVKNLVNVTLSKSSKKPKLPLLSYHIDLSPFLKENMYVGFSASTGLLASSHYIFGW  
SFKLNGEAQFLDLDLPLPGPKKHTGLILAIISVIFTLISILVGIYLIKKFKNSDVIESWELEV  
GPHRYSYQELKQATRGFKDSELLGYGGFGKVKVGSQNSKMQIAVKRISHESKQGLREFVS  
EISSIGRLRHRNLVQLVGWCRRRGDLLLVDYDFMPNGSLDNFLFDKPRMVLWEQRFKIIKGV  
ASGLLYLHEGYEQVVHRDVKASNVLLDGELNAKLGDFGLARLYEHGSPCTTRVVGTLY  
LAPELPRTRATEKSDVFAFGALLLEVCGRRPIESKAGPEELVLVDMVWNKMREGKILDVID  
KRLKGEFNREVVIVLKLGLMCSNNEALARPSMRQVMSYLEGEIEMPAPMAPGVYNGGFG  
FDENELHSLASSRGHTYLANGDVGTFVSISTAPMSCLFTDEVPR

>NbS00027351g0001.1 Corrected; GenBank ID: KT225327

ATGGTCAGTTTATGTCTTCTACTACTCTGCTCTCTCATTTCCTTCTATACAGCTTGATG  
GCTTCATCCATACAAGATTCAATCAACCAACAACAACATGACCTTAAGTGGAGTTGCAG  
AAATAAACCAAAAATGGATTTATTCAATTAACCAATGAAACAAGTAGACTTATGGGTCATGC  
TTTCTATTCTTACCTTTTCAGTTCAAGAACTCAACTACAGCCACTGCTTTTTCTTTTTCAA  
CATGTTTTGCTCTTTCTATAGTGCCTGAATATCCAAAACCTTGGTGGTCATGGACTTGCTTT  
TACTATTTCTCAATCAAATGATTTAAGCACAGCTCTTCTAGTCAGTATTTAGGTTTACTCA  
ATGCTACTGATGTTGGTAATTTCTCTAATCATATATTTGCTGTTGAATTTGATACATACAA  
GATTTTGAGTTTAGAGATATTAATGATAATCATGTTGGTGTCAACATCAATAGTTTAAGGT  
CTAATATGTCTGTTGCAGCTGCTTACTTTGATGATGATTTGGTAAAACAAGATCTGAATCT  
TAAATGTGGGAAGGTAATATTGGCATGGGTAGAATATGATTCAGTTAAAACCTTGGTTAAT  
GTTACTCTTTCAAATCTTCTAAGAAACCCAAGTTGCCACTTTTATCTTATCATATAGATCT  
CTCTCCATTTCTCAAAGAAAATATGTATGTTGGTTTCTCTGCTTCAACTGTTTTGCTTGCT  
AGTTCTCATTATTTTTGGTTGGAGTTTTAAGTTGAATGGTGAAGCCCAATTTCTAGACT  
TGGATTCACTTCCACTACTACCTGGTCCCAAGAAGAAGCACACTGGCCTAATTTTAGCTA  
TCTCAATCATATCTGTTATTTTTACTTTGATTTCTATCTTAGTTGGTATTTATTTGATCAAGA  
AATCAAGAATTCTGATGTTATAGAGTCTTGGGAGCTTGAGGTTGGTCCTCATAGATATT  
CTTATCAAGAACTTAAGCAAGCTACTAGAGGTTTTAAGGATAGTGAGCTTCTTGGTTATG  
GTGGATTTGGTAAAGTTTATAAGGGTGTTCACAAAATTCGAAGATGCAAATCGCTGTGA  
AGCGTATTTTCGCATGAATCTAACAGGGTTTGCAGCAATTTGTGTCTGAAATTTCTAGCA  
TTGGAAGACTTCGTCATAGGAATTTGGTTCAATTGGTAGGATGGTGTAGACGTCGTGGT  
GATTTGTTACTTGTCTATGATTTTATGCCTAATGGGAGTTTAGACAACCTTCTGTTTGATAA  
ACCTAGAATGGTATTGTCTTGGGAGCAGAGGTTCAAGATCATCAAAGGGGTCGCTTCGG  
GTTTGCTATACTTACATGAAGGTTATGAACAAGTTGTGGTGCATCGAGACGTTAAGGCTA  
GTAACGTGTTGCTAGATGGTGAAGTTAAATGCCAAGCTTGGAGATTTTGGACTAGCAAGAT  
TATATGAGCACGGATCAAACCCGTGCACGACTAGGGTAGTAGGCACATTGGGGTACCTT  
GCACCAGAATTGCCAAGAACGGGAAGGGCTACAGAAAAATCTGATGTCTTTGCCTTTGG  
TGCATTGTTGCTTGAAGTGGTGTGTGGGCGTAGGCCGATTGAGTCAAAGGCAGGGCCC  
GAGGAGTTAGTCTTAGTGGATATGGTATGGAACAAAATGAGAGAAGGGAAAATTCTTGAT  
GTTATCGACAAGAGATTGAAAGGTGAGTTCAATGAACGTGAAGTTGTATTGATTGAAA  
TTGGGACTAATGTGTTCAAACAATGAAGCGTTGGCGCGGCCTAGCATGAGACAAGTGAT



GAGTTATTTGGAAGGTGAAATTGAAATGCCAGATGCTCCAATGGCTCCTGGTGTTTATAA  
TGGAGGATTTGGATTGACGAAAATGAACTGCATTCTTTAGCATCTTCAAGAGGACACAC  
ATATTTGGCTAATGGAGATGTAGATGGTACATTTGTTTCTATTTCTACTGCACCAATGTCA  
TGTTTATTTACTGATGAAGTACCTAGGTAG

>NbS00029393g0011.1

MFQTPLEMVSLCLLLLCSLISSSIQLDGFTYTRFNQPNMNTLSGVAKISQNGFIQLTNETSRL  
MGHAFYSSPFQFKNSATGTAFSSTCFALSIVPEYPKLGGHGLAFTISQSNLSTALPSQYLG  
LLNATDVGNFNSNHIFAVEFDTVQDFEFGDINDNLQDFEFGDINDNHVGNINSLRSDISAAAA  
YFDDDLVKQDLNLKCGKVLAWVEYDSVKNLVNVTLSRSSLKPKLPLLSYHVDLSPFLKGNM  
YVGFSASTGLLASSHYIFGWSFKLNGEAKFLDLDLPLPGPKKHTGLILAISTIAVVFTLISIL  
VGIYLIKFKFNADVIESWELEVGPFRYSYQELKQATRGFKDSELLGFGGFGKVYKGVLQNSK  
MEIAVKRISHESKQGLREFVSEISSIGRLRHRNLVQLVGWCRRRGDLLLLVYDFMPNGSLDNF  
LFDKPRMVLWEQRFKIIKGVASGLLYLHEGYEQVVVHRDVKASNVLLDGELNAKLGDFGLA  
RLYEHGSPNCTTRVVGTLGYLAPELPRTRATEKSDVFAFGALLLEVVCGRRIPIESKAGPEE  
LVLVDMVWNKMRGKTLVDIKRLKGEFNEREVVMVLKGLMCSNNEALARPSMRQVMSY  
LEGEIEMPAPMAPGVYNGGFGFDENELHSLASSRGHTYLANGDVD

>NbS00029393g0011.1 Corrected; GenBank ID: KT225328

MFQTPLEMVSLCLLLLCSLISSSIQLDGFTYTRFNQPNMNTLSGVAKISQNGFIQLTNETSRL  
MGHAFYSSPFQFKNSATGTAFSSTCFALSIVPEYPKLGGHGLAFTISQSNLSTALPSQYLG  
LLNATDVGNFNSNHIFAVEFDTVQDFEFGDINDNHVGNINSLRSDISAAAAAYFDDDLVKQDLN  
LKCGKVLAWVEYDSVKNLVNVTLSRSSLKPKLPLLSYHVDLSPFLKGNMYVGFSASTGLLAS  
SHYIFGWSFKLNGEAKFLDLDLPLPGPKKHTGLILAISTIAVVFTLISILVGIYLIKFKFNADVI  
ESWELEVGPFRYSYQELKQATRGFKDSELLGFGGFGKVYKGVLQNSKMEIAVKRISHESKQ  
GLREFVSEISSIGRLRHRNLVQLVGWCRRRGDLLLLVYDFMPNGSLDNFLFDKPRMVLWEQ  
RFKIIKGVASGLLYLHEGYEQVVVHRDVKASNVLLDGELNAKLGDFGLARLYEHGSPNCTTR  
VVGTLGYLAPELPRTRATEKSDVFAFGALLLEVVCGRRIPIESKAGPEELVLVDMVWNKMR  
EGKTLVDIKRLKGEFNEREVVMVLKGLMCSNNEALARPSMRQVMSYLEGEIEMPAPMA  
PGVYNGGFGFDENELHSLASSRGHTYLANGDVDGTFVSISTAPMSCLFTDEVPR

>NbS00029393g0011.1 Corrected; GenBank ID: KT225328

ATGTTTCAAACCCATTAGAAATGGTCAGTTTATGTCTTCTACTACTCTGCTCTCTCATT  
CCTCCTCTATACAGCTTGATGGCTTTACCTACACAAGATTCAATCAACCAACAATAACAT  
GACCTTAAGTGGAGTTGCAAAAATAAGCCAAAATGGATTTATTCAGTTAACCAATGAAAC  
AAGTAGACTTATGGGTCATGCTTTCTATTCTTACCTTTTTCAGTTCAAGAACTCAGCTACA  
GGCACTGCTTTTTCTTTTTCAACATGTTTTGCTCTTTTCTATAGTACCTGAATATCCAAAAC  
CGGTGTCATGGACTTGCTTTTACCATTTCTCAATCCAATGATTTAAGCACAGCTCTACC  
AAGTCAGTATTTAGGTTTACTCAATGCTACTGATGTTGGTAATTTCTCTAATCATATATTTG  
CTGTTGAATTTGATACAGTACAAGATTTTGGATTTGGAGATATTAATGATAATCATGTTGG  
TGTTAACATTAATAGTTTAAAGGTCTGATATCTCTGCTGCAGCTGCTTATTTTATGATGAT  
TTGGTAAAACAAGATCTGAATCTTAAATGTGGTAAGGTAATATTGGCATGGGTAGAAATAT  
GATTCAGTTAAAACCTTGGTTAATGTTACTCTTTCAAGATCTTCTTTAAAACCCAAGTTGC  
CACTTTTATCTTATCATGTAGATCTCTCTCCATTTCTCAAAGGAAATATGTATGTTGGTTTT  
TCTGCTTCAACTGGTTTGGCTTGTAGTTCTCATTATATTTTTGGTTGGAGTTTTAAGTTGA  
ATGGTGAAGCCAAATTTCTAGACTTGGATTCATTCCTTTATTGCCTGGTCCCAAGAAGA  
AGCACACTGGCTTAATTTTAGCTATCTCAACTATAGCTGTCGTTTTTACATTGATTTCTATC  
TTAGTTGGTATTTATTTGATCAAGAAATCAAGAATGCTGATGTTATAGAGTCTTGGGAGC  
TTGAGGTTGGTCTCATAGATATTCTTATCAAGAACTTAAGCAAGCTACTAGAGGTTTTAA  
GGATAGTGAGCTTCTGGTTTTGGTGGATTTGGTAAAGTGTACAAGGGTGTTTTACAAAA  
TTCAAAGATGGAATCGCTGTGAAGCGTATTTCCGATGAATCTAAACAGGGTTTTGCGCGA  
GTTTGTGTCTGAAATTTCTAGCATTGGAAGACTTCGTCATAGGAATTTGGTTCAATTAGTA  
GGATGGTGCAGACGTCGTGGTGATTTGTTACTTGTCTATGATTTTATGCCTAATGGGAGC  
TTGGACAATTTCTGTTTGATAAACCTAGAATGGTATTGTCTTGGGAGCAGAGGTTCAAG  
ATCATCAAAGGGGTTGCTTCAAGTTTACTATACTTACATGAAGGTTATGAACAAGTTGTG  
GTGCATCGAGACGTTAAGGCTAGTAATGTGTTGCTAGATGGTGAAGTTAATGCCAAGCTT  
GGAGATTTTGGACTAGCAAGATTATATGAGCACGGATCAAACCCGTGCACCACAAGGGT  
AGTAGGCACATTGGGTTACCTTGCACCAGAATTGCCAAGAACAGGACGGGCTACAGAAA  
AGTCTGATGTCTTTGCCTTTGGGGCATTGTTGCTTGGAGGTGGTTTTGTGGGCGTAGGCCG  
ATTGAATCAAAGGCAGGGCCCGAGGAGTTAGTCTTAGTTGATATGGTATGGAACAAAAT

GCGAGAAGGGAAAACCTCTTGATGTTATAGACAAGAGATTGAAAGGCGAGTTCAACGAAC  
GTGAGGTTGTGATGGTATTGAAATTGGGGCTGATGTGTTCAAACAACGAAGCGTTGGCG  
CGGCCTAGCATGAGACAAGTGATGAGTTATTTGGAAGGTGAAATTGAAATGCCAGATGC  
TCCAATGGCTCCTGGTGTTTATAATGGAGGATTTGGATTTCGACGAAAATGAACTGCATTC  
TTTAGCATCTTCAAGAGGACACACATATTTGGCTAATGGAGATGTAGATGGTACATTTGTT  
TCTATTTCTACTGCACCAATGTCATGTTTATTTACTGATGAAGTACCTAGGTAG

---

>NbS00003611g0313.1

MQRNTKLKIRKWKRLGSIYLIQVKTVDCLNFSYANFPKQENENDFITTNYSFIGLNAAMQVTGD  
ARGTTITNLSGRIWYHQPFKLWNRKKNITASFNSTFVINIAPQSNPWGEGLAFILTKESGLNSI  
PDNSDGQWL GIVNASTNGSLSNIFAVEFDTRKSYFEDLDDNHVGDINSIYSINQASLTDRG  
VNLSRAIDVIASVQYDGESKILEVYAFMSNQTGGFNARIPVIMPLDLSYLSSEDFVVGFSASTGI  
YTQLNCIKAWNFTSIQIGNDNDGSELLWLWILIPISGLVMFLGGVFIYFTWRRKKKRMQVIDQN  
EKIEILIRSSATAPQRFQLKDLKRGTFNFDPRNILGRGGCGVVKGLLADKDVAVKRFFKDSS  
QGAKDLIAEVTTIGNLHHKNLVKLFGWCYESNELLVYEFMPNGSLDKLIFCEEKGEIREGLS  
LSWEKRHVIVCGIAQALDYLNHGCAKRVLHRDIKASNIMLDSELNARLGDFGLARTVQVSGM  
THHSTKEIAGTLGYMAPESFLIGRATVETDVFAFGVLILEVVCGRKPGNQNVENIYSNSIIEYV  
WDLYKSEKITDAIDVQLDREFDEGQAECVLMGLACCHPNPYERPSMKTALQILTGESVLPTI  
PTEKPAFVWPARAPSSNDAAGDSFMEGQLTPITVLSGR

>NbS00003611g0313.1 Corrected; GenBank ID: KT225329  
MFYLGKISYLTSLLYLIFFIFTLFLEVFLVIRVDCLNFSYANFPKQENENDFITNYSFIGLNAAMQ  
VTGDARGTTITNLSGRIWYHQPFKLWNRKKNITASFNSTFVINIAPQSNPWGEGLAFILTKES  
GLNSIPDNSDGQWLGVNASTNGSLSNIFAVEFDTRKSYFEDLDDNHVGDINSIYSINQASL  
TDRGVNLSRAIDVIASVQYDGESKILEVYAFMSNQTTGGFNARIPVIMPLDLSYLSSEDFVFGFS  
ASTGIYTLNLCIKAWNFTSIQIGNDNDGSLWLVILIPISGLVMFLGGVFIYFTWRRKKKRMQ  
VIDQNEKIEILIRSSATAPQRFQLKDLKRGTFNFDPRNILGRGGCGVVFKGLLADKDVAVKRF  
FKDSSQGAKDLIAEVTTIGNLHHKNLVKLFWCYESNELLVVYEFMPNGSLDKLIFCEEKGEI  
REGLSLSWEKRHVIVCGIAQALDYLHNGCAKRVLHRDIKASNIMLDSELNARLGDFGLARTV  
QVSGMTHHSTKEIAGTLGYMAPESFLIGRATVETDVFAGVLELVVCGRKPNGNQNVENIYSN  
SIIIEYVWDLYKSEKITDAIDVQLDREFDEGQAECVLMGLACCHPNPYERPSMKTALQILTGE  
SVLPTIPTEKPAFVWPAPARAPSSNDAAGDSFMEGQLTPITVLSGR

>NbS00003611g0313.1 Corrected; GenBank ID: KT225329  
ATGTTTTATCTAGGCAAGATTAGTTATTTAACCTCCCTTCTTTATCTAATTTTCTTCATATTC  
ACACTTTTCTTGGAAGTTTTTTGGTTATTAGGGTGGATTGCCTGAATTTTCAGCTACGCAA  
ATTTCCCAAGCAAACGAAAATGATTTTCACTACTAATTATTCTTTTATAGGATTGAAT  
GCTGCTATGCAAGTAACAGGCGATGCTCGTGGAACTACTATCACCAACTTATCTGGAAG  
AATATGGTATCATCAGCCTTTCAAGTTATGGAATCGAAAGAAGAACATCACAGCATCGTT  
TAATTCACGTTTGTGATTAATATCGCTCCTCAGAGTAATCCATGGGGCGAAGGATTAGC  
TTTCATATTTGACAAAGGAAAGTGGTCTTAATTTCTATCCAGATAATAGTGATGGACATGG  
CTTGAATTTGAAATGCAAGTACAATGGATCTTTTATCAAACAACATCTTTGCAGTTGAAT  
TTGACACAAGGAAAAGTTACTTTGAAGACTCTTGATGATAATCATGTTGGCATTGACATAAA  
CAGCATCTACTCTATCAACCAAGCTTCTTTAACTGACCGTGGTGTAAATCTTTCACGAGCT  
ATTGATGTTATAGCAAGTGTTCAGTATGATGGAGAATCAAAGATCTTGGAGTTTATGCA  
TTCATGAGTAATCAGACTGGGGGCTTTAACGCGAGAATTCCCATCATTGTCATGCCTCTT  
GATCTTTCCTATCTTCCGAGGATGTTTTCGTGGGATTTTTCAGCTTCAACTGGGATCTATA  
CTCAGCTGAACTGCATAAAAGCATGGAATTTTACAAGCATACAAATTGGAAATGATAATG  
ATGGTAGCCTATTATGGTTGTGGATCTTGATACCAATCATATCGGGTCTGGTTATGTTTCT  
TGCGGGGTTTTTATATTTTACCTGGAGGAGGAAAAGAAGAGGATGCAAGTGATAG  
ATCAAATGAGAAAATAGAGATACTGATTCGGAGTTCAGCTACTGCACCACAGAGATTCC  
AGCTTAAGGACTTGAAACGAGGGACCGGGAACCTTTGATCCCAGGAACATTCTTGAAGA  
GGAGGATGTGGAGTAGTGTCAAAGGGTTGTTAGCTGATAAAGATGTAGCTGTGAAGAG  
ATTCTTTAAAGATTCAAGTCAAGGGGCAAAAGATCTCATAGCAGAAGTCACAACCATTGG  
CAATCTCCACCACAAAACCTTGTCAAAGTGTGGATGGTGTATGAAAGCAATGAACT  
ACTTGTGGTGTATGAGTTCATGCCAAATGGGAGCTTAGACAAGTTGATATTTTGTGAAGA  
AAAAGGTGAAATCAGAGAAGGGTTGAGCCTGAGTTGGGAAAAAAGGCATGTCATTGTCT  
GTGGCATAGCTCAAGCACTGGATTATCTGCATAATGGGTGCGCGAAAAGAGTACTGCAT  
AGGGACATAAAAGCCAGCAACATCATGCTTGACTCAGAACTCAATGCTCGGTTGGGAGA  
TTTTGGATTGGCTAGGACAGTTCAAGTGAGTGGAAATGACTCACCATTCCAGCAAAGAGAT  
AGCTGGAACCTTTGGCTATATGGCTCCAGAAAGTTTCTTATAGGCCGAGCTACAGTTGA  
GACAGATGTGTTTGCATTTGGAGTGTCTATTCTTGAAGTTGTCTGTGGTCCGAAAACCTGG  
AAACCAAAATGTGGAGAATATCTACAGCAACAGTATCATTGAATATGTGTGGGATCTCTA  
TAAGAGTGAAAAGATCACTGATGCCATAGACGTTCAATTGGATAGAGAATTTGATGAAGG  
GCAAGCTGAATGTGTTTTAATGTTAGGATTGGCTTGTGCCATCCGAATCCATATGAAAG  
GCCAAGCATGAAAACCTGCTTTACAGATTCTAACAGGGGAATCAGTTTTTACCAACTATTCC  
TACTGAGAAACCTGCATTTGTGTGGCCAGCTAGAGCTCCATCGTCGAATGACGCTGCAG  
GTGACTCTTTCATGGAAGGCCAACTTACACCAATTACAGTTCTCAGTGGCAGATGA

>NbS00005288g0011.1  
MRVDCLNFSYANFPKQNKHDFITNYSFIGLNAAMQVTGDARGTTITNLPGRWYRQPFKLW  
NRKKNITASFNSNPWGEGLAFILTEKSLHSIPDKSNGQWLGVNASTNGSLSNIFAVEFD  
RKSIFEDLDDNHVGDINSIYSINQASLTNRGVNLSRAIDVIARVQYDGDGSKILNVYAFMSNQI  
GGFNASNPIISMPLDLSYLPEDVFGFSASTGIYTLNLCIKAWNFTSTEIGNDNDTNNICSGY  
VSWWGFYIFHLEEEKEEDATTAPQRFQLKDLKRGTFNFDPRNILGRGGCGVVFKGLLADKEVAV  
KRFFRDSSQGAKDLIAEVTTIGNLHHKNLVKLLGWCYESKELLVVYEFKPNGSLDKLIFCEEK  
GEIRGVEPEL GKKTVLHRDIKASNIMLDSELNARLGDFGLARTVQVSGMTHHSKKEIAGTLGY  
MAPESFLIGRATVETDVFAGVLELVVACGQKPGNQNEENIYSNRHIEYVWDLYKSERIIGAI  
DLDRDFDEGQAECV

>NbS00005288g0011.1 Corrected; GenBank ID: KT225330  
MFYLIFIFTLFLEGFIVMRVDCLNFSYANFPKQNKHDFITTNYSFIGLNAAMQVTGDARGTTIT  
NLPGRIWYRQPFKLNWRKKNITASFNSNPWGEGLAFILTEKSLHSIPDKSNGQWLGVNAS  
TNGSLSNIFAVEFDTRKSYFEDLDDNHVGDINSIYSINQASLTNRGVNLSRAIDVIARVQYD  
GDSKILNVYAFMSNQIGGFNASNPIISMPDLSPEDVVFVGFSASTGIYQLNCIKAWNFTST  
EIGNDNDTNNICSGYVSWWGFYIFHLEEEKEEDATTAPQRFQLKDLKRGSGNFDPRNILGR  
GGCGVVKGLLADKEVAVKRFFRDSSQGAKDLIAEVTIGNLHKNLVKLLGWCYESKELLV  
VYEFKPNGSLDKLIFCEEKGEIRGVEPELGKKTVLHRDIKASNIMLDSELNARLGDFGLARTV  
QVSGMTHHSKKEIAGTLGYMAPESFLIGRATVETDVFAFGVLILEVACGQKPGNQNEENIYS  
NRIIEYVWDLKSERIIGRIDVRLDRDFDEGQAEVC

>NbS00005288g0011.1 Corrected; GenBank ID: KT225330  
ATGTTTTATCTAATTTTCTTCATATTCACACTTTTCTTAGAAGGTTTTATTGTTATGAGGGT  
GGATTGCCTGAATTTACAGCTACGCAAATTTCCCAAGCAAAATAACATGATTTTCATCACT  
ACTAATTATTCCTTCATAGGATTGAACGCTGCTATGCAAGTAACAGGCGATGCTCGTGGA  
ACTACTATCACAACTTACCTGGAAGAATATGGTATCGTCAGCCTTTCAAGTTATGGAATC  
GAAAGAAGAACATCACAGCATCGTTAACGTTTGTGATTAATATCACTCCTCAGAGTAATC  
CGTGGGGAGAAGGATTAGCTTTTCATATTGACAGAGAAAAGTGGTCTTCATTCCATCCCAG  
ATAAAAGTAATGGACAATGGCTTGAATTGTGAATGCAAGTACAAATGGATCTTTATCAA  
CAACATTTTTGCAGTTGAATTTGACACAAGGAAAAGTTACTTTGAAGATCTTGATGATAAT  
CATGTTGGCATTGACATAAACAGCATCTATTCTATCAATCAAGCTTCTTTAACTAACCGTG  
GTGTTAATCTTTCACGAGCTATTGATGTTATAGCAAGAGTTCAGTATGATGGAGACTCAA  
AGATCTTGAATGTTTATGCATTCATGAGTAATCAGATCGGGGGCTTTAACGCGAGTAATC  
CCATCATTTCCATGCCTCTTGATCTTCTATCTTCCCAGAGGATGTTTTCTGTTGGATTTTC  
AGCTTCAACTGGGATATATACTCAGCTGAACTGCATAAAGGCATGGAATTTTACAAGCAC  
AGAAATTGGTAATGATAATGATGATACCAATAATATCTGTTCTGGTTATGTTTCTTGGTGG  
GGTTTCTATATCTTTCACCTGGAGGAGGAAAAGAAGAGGATGCAAGTGATAGATCAAAA  
TGAGAAAATAGAGATACTGATTCGGAGTTCAGCTACTGCACCACAGAGATTCCAGCTAAA  
GGACTTGAAACGAGGGAGCGGGAACCTTTGATCCAGAAACATTCTTGAAGAGGAGGG  
TGTGGAGTAGTGTTCAAAGGGTGTGTTAGCTGATAAAGAGGTAGCTGTGAAGAGATTCTT  
AGAGACTCAAGTCAAGGGGCAAAAGATCTCATAGCAGAAGTCACGACCATTGGCAATCT  
CCACCACAAAACCTTGTCAAATGTTAGGATGGTGCTATGAAAGCAAAGAACTCCTTGT  
GGTGTATGAGTTCAAGCCAAATGGAAGCTTAGACAAGTTGATATTTGTGAAGAAAAGG  
CGAAATCAGAGGGGTTGAGCCTGAGTTGGGAAAAAAGACGTCATTGTCTGTGGCATAGC  
TCAAGCACTGGATTATCTGCATAATGGGTGCGCGAAAAGAGTACTTCATAGGGACATAAA  
AGCCAGCAATATCATGCTTGACTCAGAACTCAATTCGAGTTGGGAGATTTTGGATTGGC  
TAGGCTATATGGCTCCAGAGAGTTTTCTTATAGGCCGAGCCACTGTTGAGACAGATGTG  
TTTGCATTTGGAGTGCTCATTCTTGAAGTTGCCTGTGGTCAAAAACCTGGAAACCAAAT  
GAGGAGAACATCTACAGCAACAGAATCATTGAATATGTGTGGGATCTCTATAAGAGTGAA  
AGGATCATTGGTGCCATAGATGTTTCGATTGGATAGAGATTTTGTGAAGGGCAAGCTGAA  
TGTGTGTAA

---

>NbS00007832g0008.1 GenBank ID: KT225331  
MRLLTPKLNTIFIFFCCLHSISQAKLKKFEKQYGNFDHTYIPFLEIKEPAQISNQALQVTPDTAN  
SHYNMFNNSGRILLKQSFKLWEGDTSSKDSRVASFNSSFLVNIYRLDNKTAEEGLTFLITPDL  
DLPPNSQGGYLGLTNATTDGKFINRILAVELDTFQQDFDIDDNHIGIDIHSIKSIRSESLAKHGIE  
LAPIGARFYNIWVQYDGIKKVLDVYIAEQDEKNGATPPRPKDPILSHDLDRDFVNQESYFGF  
SASTGNFNQLNCVLRWNFTVEYFQEKQSLTLGLGVGVPLFVLFLLLVVYLYGYCYKKRVAR  
SESNIVGALKSLPGMPRDFEFKVLKNATDNFDEKKNLGEFFGVVYKGYLVGENLEIAVKWF  
SRESMKGQDDFLAELTIINRLRHKHLVLLGWSHKHGKLLVFEYMPNGSLDKHLFSGPDKK  
PLSWQVRYKIVSGVASALHYLHDEFEQKVVRDLKASNIMLDTNFNARLGDFGLARALDHEK  
TSYAESEGLTGMGYIAPECFHTGKATQHSVDYAFGAVLLELVCGQRPQTKVNGFQLFADW  
VWYLHRDGRILETVDTSLGDDYVAEEAKRLLLLALACSHPIASERPQTIVQIISGSPAPEV  
PPFKPAFVWPSMVPMETDIDSSLVDTISITTPQFSSGNNNSVEYRSK

>NbS00007832g0008.1 GenBank ID: KT225331  
ATGAGATTATTGACACCAAACCTCAACACCATCTTTCATCTTTTTCTGTTGTCTTCATTCCAT  
ATCTCAAGCCAAGCTGAAAAAATTCGAAAAACAATATGGAAATTTTGACCATACATATATT  
CCATTCTTGAAATTAAGAACCAGCACAAATCAGCAACCAAGCTTTACAAGTAACTCCT

GATACAGCCAACCTCTCATTACAACATGTTTAATAATTCAGGTAGAATTCTCTTGAAACAAT  
CCTTCAAATTATGGGAAGGTGACACGTCATCAAAAGATAGTAGAGTTGCATCTTTCAACT  
CTTCATTTCTTGTGAATATTTACAGGCTAGATAATAAACTGCAGCTGAAGGTTTAACTTT  
CTTGATTACTCCTGATTTGGATTTGCCACCAATAGCCAAGGGCAGTATTTAGGGTTGAC  
AAATGCTACTACTGATGGGAAATTTATTAACAGAATTCTCGCGGTTGAGCTCGATACTTTT  
CAGCAAGATTTTGACATTGATGATAACCATATTGGCATTGATATTCATAGTATTAATCTAT  
AAGGTCTGAATCTTTAGCCAAACATGGGATTGAGCTTGCTCCAATTGGTGCAAGATTTTA  
CAATATTTGGGTACAATATGATGGTATCAAGAAAGTTCTTGATGTGTACATAGCAGAACAA  
GATGAGAAAAATGGCGCAACCCACCTAGGCCAAAGGATCCAATATTATCACATGATCTT  
GATTTAAGGGATTTTGTGAATCAAGAATCATACTTTGGATTTTCTGCTTCAACAGGGAATT  
TTAATCAATTGAATTGTGTGTTAAGGTGGAATTTTACAGTTGAGTATTTTCAAGAAAAAAT  
CAATCTTTAACTCTTGGTTTAGGTGTTGGGGTTCATTATTTGTTCTATTCTTGATTTTGGT  
AGTATATTTAGGGTATTATTGCTACAAAAAGAGGGTTGCTAGGTCAGAGTCAAATAGATT  
GGTGCACCTAAGAGTTTGCCTGGAATGCCTAGAGATTTTGAATTTAAGTATTGAAGAAC  
GCTACTGATAATTTGATGAAAAGAATAAGTTGGGTGAAGGGGGATTTGGAGTTGTATAC  
AAAGGGTATTTAGTTGGTGAATTTTGGAAATTGCAGTGAAATGTTTTTCAAGGGAAAGT  
ATGAAAGGTCAGGATGATTTCTTGGCTGAACTTACCATTATCAACCGTCTCAGGCATAAA  
CATCTTGTCAAATTGCTTGGTAAGATTTTTTTTTTACTGTACTTTTTACTTTTTGTATTAAGG  
AAAATTTGTTATATATAAGAGTTGTTGCTGTGTGACCAGAAAATCTCGAGTTGAAGCATGA  
GTTGGAATCTTTTAAACAAGGTGCATGAATTTTCTGTTCTTAAAATAAGTCTTTACTACTA  
TGGAGAAAAATTTAAGAGCTTTTATGCGCAGCGTCAAAAATGGTTTGCATAGATTTGAC  
AACAGTTTGAAGTGAACAATATTTTTTCAACGAAGTAGGAGTTTGGACATGATTTTTGA  
AAAAAGTAATATTTGAACTAAGTTGAAAACGGTGAATTTGAAATATATTTGGACAT  
GCATTTTACTTGAAAAAAAAGTTGTATATTTTTTAGCGGAGAAAATAAATTTCTAAAATTT  
GAAAAAGGGTTTTTTTTGCAAATTTTTATAAACTTGCAAAAATTTACAGACAAATACATTT  
TTGAAAAAAAATTAACAATAAAAAAAGTTATAGACAAACGGGACCTAAATCTTGCTTCT  
AATATTTTCTGAGGGTTTGGTACCAGAGATAATTAAGGGATAATTAATTTCAAGATTAAT  
TTAAGATAATTTATCTTATGTTTGGTTGGAACAAAATCACTGTATAAATAATTTTCAAGATTA  
GTTATCTCAGAATTATAATATTATTCTTATTCTTATAGAAGGGCGGGATAACTGAACTCGA  
AACAAATTAATTTTGAAGATAATTTATTTCTCAACTAAACGACCCATATATGATGTTGCACTG  
GTTGAACGGTTCTTCTTGCCTTTTTAAATTTTGGGTCCGCCTATAACCGGTGGGGATAA  
CTTTGAATGTTAAAAGTTGGTCAATAGTGGATAGGATTTAGGAGTAATTGAGAGAACAATT  
ATAAAAGCAAAAATATTGAATTATCTTTCTTTTCGAGATGAATAAAGAATCCTATGGAAAA  
AGACTTCATGGATGTGATCGGAGAAAATGGTCCAATCTTTAAAACGAATAAAATATATGT  
AAAGCCAAACCTTTGTAGGGTATGATCACTCGAATGCAAGAACCCTTTTGTAGCCTAA  
ATAATAACAATAATGCCCTCTTGGAGCAAAAATCCAAAATTTAATAGTTAAGTTCTTGGCT  
GGAAGACAGAAGGCACTGATTCATCCCTTTAGTATCTATTTTTGCTTTCTCTACCAACA  
CTTTTACAGACATAGTCCCACAGAAATTTAAATTTTATGAATTTTAAATTTACAACCTAACTTAG  
AGTTCATTATTTAGTTGTTAGGTTTGAATTAATATTTAATAATTTTTTTAGTACAAATATA  
AAATTTAAGCAAAAAGTTGCTGGGTTTCTGCTGAACCCGTAGATAACACCCTCTCTCCGCC  
ACTGCTTGTAGTTCTCAAGTTTGGAGCTTTGAAAATGGAGTAATCCGTTTTTATAAATTAGT  
CCTACACGGCACGAATTTGAATTAATTAGATCAGTAGATTCCGGATATTATTTGATTCTTA  
TGTACGATCTTTTGTCTTGTGCTCAAGCTTAAAATGTGCCCTAGATTAGTCTTTAAACAG  
TGAAATCAGCAATGAGATCATTAGTGTCTTGAATCATGGTTTTGAACAGGAATTTCTTTT  
TTGTGGAATCCTTCAACTAGCTTGTCTCATTCTTATCTTTAAGTCTTCTCGATTTTATC  
TTGTGTTTATAAGGACTTTATTTAAAGTGTGTACATATAAGCAATGAGGTTCAAACATAA  
AATTCAAATCCAAAATTTGCTTCTGACCATAGTCAAAGCAATTTTCTTGTGCTATACTTTCT  
CAGTAAGAATCAAGGAAGCTTCATTGGAAAATCAACCTTCATTCAAATGTCAATTATTGTG  
ACAAATTTGGTATTATCTAAAAGTTAATATCAACATCATAGCCACTGAATAGAACAATTTG  
CTTCAAATGCAATCAACTCCAATTAATGCTAAGAGGTGACCCTACAACAATACATCATAA  
TTGAGACCTGTTAAAACCTAGGTCCTACAAAATAGATGATTGGAGCACTGCTTACCCAACCT  
TTTTTTTTGCCATGAAAAAGTTGATATCCTTAGCATTTTATAGATCATTATTGTTGATTG  
GATAAATTGATATACCATTATTATTGTATCAAGGAATTAACCTATATACACTAACCGTATTA  
AGAATTTTACATTATCAATGTGCTTTGATCTATTGTAGCAGATAAATTTACTTCAAAGGTGA  
AACTGTTGTATCAGTTTGAAGCTAACCGGATTTTCTTTAAGGGGGTTCAATTTAAAATTT  
AAAAGAGATTGTAGTTAGTGAGAATTGAACCGAGTGCCTCACAAAAGTTTTAACTTCTT  
CACCCTAACTATGCTTTACGGTTATGATAAGTTGATTCAGAATATAACATATACAGATT  
AAACAGAACTTGCCTTGTATGTACAATAAATTTTTCGGCGAAGAGGTTTTCGAGTGAAC  
CCTTCGGCCCCCTAAATCCGCCCATGGCTGCAGCTATTATCATAGTATAAAAAATGAAG  
GAGAACCTCGGCGTAACAAGTAAAGTTGTTATCATGTGACCAGGAGGTCACGGGTTCTGA

TTACGGGGTAAGGCTACGTACGATAGATCATTATGGTCCAGCCCTTCCTTGGACCCTGT  
GCATAGCGGGAGCTTAGTGCACCGGACTGCCCTTTTTTGTGAGAAACATTTAACTATTGG  
CCTTTCTAGCAGACTTATTGACTTTCAAGCAAATTAGTGTGCAACTACAAGCTGATGAGA  
ACAGCAATACAGACATAAGCATCTTACAATCATATATTATTGTGACAGGATGGAGCCACA  
AGCATGAAAAGCTAATACTTGTATTTGAATACATGCCAAATGGTAGCCTAGACAAACACC  
TTTTCTCAGGTCCAGATAAAAAGCCACTCAGCTGGCAAGTCAGGTACAAGATTGTATCGG  
GCGTCGCCTCAGCCCTGCACTATCTCCACGATGAGTTTGAGCAGAAAAGTGGTCCATCGT  
GATCTTAAGGCGAGCAACATCATGCTCGACACCAACTTCAATGCACGCCTCGGTGATTTT  
GGCCTGGCACGAGCACTTGACCACGAGAAGACCTCGTATGCTGAGTCCGAGGGAGTGC  
TAGGCACGATGGGGTACATTGCACCAGAGTGTTCACACTGGAAAAGCCACTCAACAT  
TCTGATGTCTATGCATTTGGGGCAGTATTGTTGGAATTAGTATGCGGCCAAAGGCCTGG  
AACGAAAGTTAATGGCTTTCAACTATTCGCCGATTGGGTTTGGTACTTGCATCGCGACGG  
TAGAATCCTCGAAACTGTTGACACGAGTCTCGGGGATGATTATGTAGCTGAAGAAGCAA  
AGAGATTGTTACTTCTTGGCATGCTCTCATCCAATTGCTAGTGAAAGGCCTAAAA  
CACAGACGATATTTCAAATTATATCAGGGTCAGTACCAGCACCAGAAGTTCCACCATTTA  
AACCAGCATTGTGTGGCCTTCTATGGTGCCAATGGAAACTGATATAGACTCGAGTCTTG  
TCGATACGATATCCATTACAACCTCCTCAGTTCAGTTCAGGAAACAACAGCGTTGAGTATC  
GAAGCAAGTAG

---

>NbS00001007g0015.1 GenBank ID: KT225332  
MGLLTAKLNTIFLCLQSIQAKLKKFDKQYGPFDETYDIFQVVPATISNQALQVTSDYA  
KNLMILFNNAGRILFEQSFKLWDDSSKRVASFNSSFLVNIYRVKNETATEGLTFLISPDLELPT  
NSLTNGNTDGRSANKVIAVELDTFKQEFDPDDNHIGIDIHSVISVKVESLTPHGIELAGIGARFY  
NIWVQYDGIKKVLVDVYIVEQTEVNGSTPPRPENPILTHDVLDRDVVNQESYFGFSASTGNFS  
QLNCVLRWNLTVLGFICSILDFVTTSGYYYHKKKAARSESITLGALKSLPGMPRDFEFKVLKK  
ATNNFDEKNKLGEGGFGVYKGYLVGENLEIAVKWFSRESIKGQDDFLAELTLSTVFGINIFK  
LLGWSHKHGKLLLIYKYPNGSLDKHLFSGPDKPLSWQIRYKIISGKVIHRDLKANNIMLDSK  
SSKYRPRKE

>NbS00001007g0015.1 GenBank ID: KT225332  
ATGGGATTGTTGACAGCAAACTCAACACCATCTTCATCTTTCTCTGCTGTCTTCAGTCCA  
TATCTCAAGCCAAGCTAAAGAAATTCGATAAGCAATATGGACCCTTGACGAAACATACT  
ATGACATATTTCAAGTAGTACCTCCTGCAACTATCAGTAACCAGGCTCTCCAAGTAACTT  
CTGATTATGCCAAAAATTTAATGATCCTGTTCAATAATGCAGGAAGAATCCTCTTTGAACA  
ATCCTTCAAATTTGTTGGGATGATAGTACAAAAGAGTGGCATCTTTCAACTCTTCATTCTC  
GTAAACATTTACAGGGTAAAAAATGAACTGCAACTGAAGGTTAACTTTCTTGATTTCTC  
CTGATTTAGAGCTGCCAACCAACAGTCACTGACAGCATTAGGCTTGACAAATGGTAATA  
CTGATGGTAGATCTGCCAATAAAGTAATCGCAGTTCGAGCTTGATACATTCAAGCAAGAGT  
TTGACCCTGATGATAACCATATTGGGATTGATATTCATAGTGTTATTTCTGTAAAGGTGCA  
ATCTTTAACCCCTCATGGAATTGAGCTTGCTGGCATTGGTGCAAGATTTTACAATATTTGG  
GTACAATATGACGGTATCAAGAAAGTTCTTGATGTGTACATAGTAGAGCAAACCTGAGGTA  
AATGGCTCAACCCACCTAGGCCAGAGAATCCAATATTAACACATGATGTTGATTTAAGA  
GATGTTGTGAATCAAGAATCATACTTTGGATTCTCTGCTTCAACAGGGAATTTTTCCAAT  
TGAATTGTGTGTTAAGGTGGAACCTTGACAGTTGAGTACTTTCAAGAAAAAATCAATACTT  
AACCATTGGTTTAGGTGTTGGGGTTCATTTGCTCTATTCTTGATTTTGTACTACTTCTGG  
GTACTATTACCACAAGAAAAAGGCTGCTAGGTCAGAGTCAATTACACTAGGTGCACTTAA  
GAGTTTGCCTGGAATGCCTAGAGATTTTGAAGTTAAGGTATTGAAGAAAGCTACTAATAA  
TTTTGATGAAAAGAATAAGCTAGGTGAAGGGGATTTGGAGTGGTATACAAAGGGTATTT  
AGTTGGTGAAAATTTGAAATTCAGTGAAGTGGTTTTCAAGGGAAGTATCAAAGGTCA  
AGATGATTTCTTGCTGAACTTACTTTATCAACCGTCTTCGGCATAAACATCTTCAAATTG  
CTTGGAAGTATTTTTCACTCTACTTTTACTTTTCGTATTAAGGAAAACCTGGCACAAACAG  
GTGTTGCTGTCTGACTAGAAAATCACAGGTTTAAGCAAAAACAGCAACATGCAGAAACTT  
GAGTTCATGATCTTTTTTAAAACCGTGTTCCTCGGGCATCGCTTTGTGAACCCGACTA  
GCTATACCCACCGGGTCCCACTGTTTCAAGGCGTGCAACCGGTTAGTTCCACGGGGC  
CCTGAAGACGAGGCTGGTTCAGGGTTGAGTTCATGAGTTGAATTATTGCTTTGCTACACT  
CTATTCAGTGAGAACCCATTTCTCCAGCTTCTCTCTGATCAGTTTCTCTGCCTGTTTGAGT  
CCAGTGGTGTTCCTGCATCCTCAGGTCCTCTTCACTATCATTAGTTGTTGTCTGCAGC  
TCTTAATCTTGTAACACTACTCCTGATTATTGAGTTGATTGAGATTTTTGATTTCTGCTTG  
ACCTTCTTCAGTTTGCCTCAAATATTTTGCATGTGGCCTCTCTTGTTTATATTGGTCGATC

CTTTCTCCACACTGCTGAAACTCTGAATGCTCCACAATGAAGTTAAAAACCTGAATG  
GTCTATAACTTTTGACATTCCATGTGATTAATTTTCATCGTATATTGGAAGGTTGTTGTAGG  
TAACCTGCCTTATTTTCTAGTAGATTACTAGTTTCACCTTTTATGAATAGTTACATGTAATT  
ATTATTTAGCTGACTTGATAGTGTAAGGTAATTTACTCAATCAGTGTATATAAGTTAAAC  
TCTCGTATCATTGAGAGAAAATCACATCTATGACATTACTCTTACTAATAGCATCGCATC  
AAAACAACAACACTATCCAGTATAGTCCCGTAAAGTGAGGTCTGGGGAGAGTAATATGT  
AGACGAGCCTTACCCCTATCCGAAAGGGCAGAGAGGCTGTTTCCAATCGACAATCGGTT  
CAGTGAAGGAAAGGAAAAACAAAAACAAAAACAAAGACAAAAGAGCATTAGTAACTCCAG  
CAGAAATAGCGTAAATAATTATTTAAACATAATAACCATAAATAAAACACTTATAGTATTAT  
CTGCCTTTGTAGAAAACTTTTTATTTGTTTTCTACCATATTATTGTGTTAACTTCAAGCTG  
ATTAGGAGAGCAATAGAGACACATATCTTACAATACATATTATTGTGACAGGATGGAGCC  
ACAAGCATGGAAAGCTACTACTTATATAACAAGTACATGCCAAATGGTAGCCTAGACAAC  
ACCTTTTCTCAGGTCCTGATAAAAAGCCACTCAGTTGGCAAATCAGATACAAGATTATTTT  
GGCGTCTCGCTTCAGCCCTGCACTATCTACACGATAAGTTTTAGCAGAAAGTGATCCATC  
CGATCTTAAGGCGAACAACATCATGCTCGACTCCAAGAGCTCCAATATCGCCCAAGA  
AAGGAATAA

>NbS00012093g0021.1

MGLLTAKLLTIFILSCLQLKIQAKLKTFFNKEYPSFDETFNIFEVEKPATISNGALQVTPDSAS  
DDFELNNNSGRILLKQPFKLWDGDISNNKSRVASFNSSFLVNIYRPNKNETAAEGLAFLISPDLE  
KPLNSQGGYLGLTNATTDGNSTNKVVAVELDTFKQNFDPDGNHIGIDIHSVRSVKYESLSSH  
GIELAPIGARFYNIWVQYDGIKKILDVYIAEQAQEKDGSTPPRPNNPILTYNLDLKNHVNQESYF  
GFAASTGSNYQLNCVMRWNLVEYFPGKHPWLKVVLVGVIPVVVLLLLGAAYLGYIYHRRR  
VDRSQSNILGALKSLPGTPQEYKFKALKKATNNFDEKNKLGQGGYGVVYASLVEGVGIPVVV  
LLLLGAAYLGYIYHRKRVDRSQSNILGALKSLPGTPQEYKFKALKKATNNFDEKNKLGQGGY  
GVVYRGFLAAEDKDIKVFWSRESIKGEDDFLAELTIINRLRHKHLVKLLGWCHKNGKLLLVY  
EYMPNGSLDMHLFSGPDKQPLSWHVRYKIMQGVASALHYLHNEYEQRVVHRDLKASNIMLD  
SQFNARLGDFGLARALDNERTSYAEAEGVLGTMGYIAPECFHTGKATSQSDVYAFGAVLLE  
VCGQRPQTKVNGFQFFVDWVWYLHRDGRILEAVDQRLGDDYVAEEAKKLLLLGLACSHPI  
ASERPQTIVQIISGSAPAPDVPFPAFVWPSMMPMDIDSSVMDTTSITTSHFNSGWSLD  
YQSRETPTYADHPNSLV

>NbS00012093g0021.1 Corrected; GenBank ID: KT225333

MGLLTAKLLTIFILSCLQLKIQAKLKTFFNKEYPSFDETFNIFEVEKPATISNGALQVTPDSAS  
DDFELNNNSGRILLKQPFKLWDGDISNNKSRVASFNSSFLVNIYRPNKNETAAEGLAFLISPDLE  
KPLNSQSQYLGLTNATSDGNSTNKVIAVELDTFKQNFDPDDNHIGIDIHSIRSVMKYESLSSHGI  
ELAPIGARFYNVVQYDGIKKILDVYIQAQEKDGSTPPRPNNPILTYNLDLKDHNQESYFG  
FSASTGSNYQLNCVLRWNLVEYFPDKHPWLKVVLVGVIPVVVLLLLGAAYLGYIYHRKRV  
DRSQSNILGALKSLPGTPQEYKFKALKKATNNFDEKNKLGQGGYGVVYRGFLAAEDKDIKVF  
WFSRESIKGEDDFLAELTIINRLRHKHLVKLLGWCHKNGKLLLVYEYMPNGSLDMHLFSGPD  
KQPLSWHVRYKIMQGVASALHYLHNEYEQRVVHRDLKASNIMLDSQFNARLGDFGLARALD  
NERTSYAEAEGVLGTMGYIAPECFHTGKATSQSDVYAFGAVLLEVCGQRPQTKVNGFQFF  
VDWVWYLHRDGRILEAVDQRLGDDYVAEEAKKLLLLGLACSHPIASERPQTIVQIISGSAP  
APDVPFPAFVWPSMMPMDIDSSVMDTTSITTSHFNSGWSLDYQSRETPTYADHPNSLV

>NbS00012093g0021.1 Corrected; GenBank ID: KT225333

ATGGGATTGTTGACAGCAAATACTCACCATTTTCATTTTTCTCAGCTGTCTTCAACTCA  
AGATTCAAGCCCAGAAACTGAAAACGTTCAACAAAGAATATCCATCTTTTGATGAAACTTT  
CTTTAACATTTTTGAGGTTGAAAACCTGCAACAATCAGTAACGGTGCTCTTCAGGTGAC  
TCCTGACTCTGCATCTGATGATTTTGAACCAATAAATACTCGGGAAGAATCCTCTTGAAA  
CAGCCATTTAACTCTGGGATGGTGATATTTCAAACAATAAAAGCAGGGTTGCATCCTTC  
AACTCTTCTTTCTTGTAAATATTTATAGGCCAAAGAATGAAACAGCTGCTGAAGGTTTAG  
CATTCTTGATTTCTCCAGATTTAGAGAAGCCACTCAATAGCCAAGGGCAGTATTTGGGTT  
TGACAAATGCTACTACTGATGGAAATCCACCAATAAAGTTGTTGCTGTTGAGCTTGATA  
CTTTCAAGCAAACTTTGACCCTGATGGCAACCATATTGGTATTGATTTACAGTGTTAG  
ATCTGTAAGTATGAATCTTTGTCATCTCATGGGATTGAGCTTGCTCCTATTGGTGCAAG  
ATTCTATAATATTTGGGTACAATATGATGGAATCAAGAAAATCTTGATGTGTATATTGCA  
GAACAAGCTGAAAAAGATGGCTCTACACCACCTAGGCCAAACAACCCTATATTAACATAT  
AATCTTGATTTAAAAAACCATGTGAATCAAGAATCATATTTTGGATTTGCTGCATCAACTG  
GGAGTAATTACCAACTCAACTGTGTGATGAGGTGGAACCTAACAGTTGAGTACTTTCCAG

GTAAAAAGCATCCATGGTTGAAGGTTGTTTTAGGGGTTGGGATTCCAGTGGTGGTGTAT  
TACTACTTGGGGCAGCATATTTAGGGTATATTTATCACAGGAGAAGAGTGGATAGGTCAC  
AGTCAAACATATTGGGTGCACTAAAGAGTTTGCCTGGAACCCCAACAAGAGTATAAGTTCA  
AGGCTTTGAAAAAAGCTACCAACAATTTTGATGAAAAGAATAAGCTTGGGCAAGGGGGAT  
ATGGGGTGGTTTACAGAGGATTTTLAGCTGCTGAGGATAAAGATATTGCAGTCAAGTGGT  
TTTCAAGGGAAAGTATCAAAGGTGAAGATGATTTCTTGGCTGAACTTACCATCATTAAATC  
GTCTCAGGCATAAACATCTTGTCAAATTGCTTGGTAAGTCTTTTTATTTTTGTTTGAATGTA  
GATATTGGAATGTTTCTTACCATGAATTTTCACTGTTTAAAAAGAGTAAAGAGTTATGTTA  
TGCATGTTTTAGTATGATCTTGGTAGTAGGCTCAGCATGACAACATATTAGGTTTAAAAG  
CAGTTAGGAAAATGGTACTAATAATTGTCCATCGTATAAGAGAGTACAAGAAAATGAGCT  
TTTGATGGCAACTACAAAGATTGTGTTCCGCGCACAGCTTTTAGCTAAACCTTTGAGTCAC  
AATGAGGCACATCTCCAGTATTTCCATTGAAGTGATAAATTTGTTACCTTTCTCGGGGA  
AAAAAATAGTCCGGTGCCTAAACTACTCATTATGTGTGGGGTCCGGGGAAGGCCAGAC  
CACAAGGGTTTTATTATTCACAACTTACCCTGTATTTTTACAAGAGGTTGTTTCCACGCCCT  
TAACTCATGATCTCCCGATCACATGACAACAGTTTTTACCATTTACGCCAAAACCTCCCCTT  
TCCTTTCTTTAAAAAGAAAATCACTGATATAAATGTTGTTACAAGGTCCGAGTTGTATGA  
AGGGGTTTAAATTGAATCCTGTTTGGTGGAGAAGTAAAATGTGCAAATATGATAAAATTGAT  
TCTTTGTGTATAAAGAAAGTTTACAGTGTAGCAGCAAGGTGGTTCAAAAATGATTTAGGT  
CGTAGATTTGAATCCACTGTGATAATCTTGCATTTTCTTAAATTTAGGATTCTATCTCTGC  
CCCTACCATAATTACGTAATAGAGACGGGGACAAAGGAAAGGGGCCTTGTTTTATTGAC  
GTTTAGCATTTAGTAATCAGATACAAAATTCTGGTATGTTCTTGATTCCAACGAAAAAGA  
GAATTCATTAACAAGGACTCTACTGAGAGAATGGTCCAAAAGTTATTGAGATAATTTAAA  
AGCAAAGAGTGGTGGGGCATCAACTTTAATGGTAAATTTGGTACTAATAGACTGATTAAC  
CGCGTGGCAAGAATCCACTGGGCACATGCCTTATCTTTTTATGCTTTTCTTTTCCAGTG  
ACTTCCACTCAGATATCTGTGAGCTTTCTTTTATTGACTAAGTTGCGAAATGTTGATGT  
TGGACTTGTCTTTCTAGTCTGGCATTAGCTTGTAGGAATTCTATAAACATTTTTAGACA  
TTTAATGTGAGGAGTGAGAAAACTTTTTAAAGATATATACGTACGGATTATTTTGTAAAA  
CAAATTGAATTCCTTCTTGATTACATAACTGACACTTATTTTAACTAAAATAAAAAAGTAA  
ATTGGACACTCATTGTGAACCGAAGGGAGTACTAAATTGGATTTTCTGAGAAGCAGATTT  
GTCGGTTTGAAGAATCAAAGCCTTCTTGAACCCTTGTAAATTTAACTTGGTCCCTCTTTTGT  
CTTTATTCTCTTTCTTTATTGGAATTCTCGAGTCATCCCAAACGATTTGTCAAAGCTTCT  
CCTTGGAGCTCCGGTTATTAGCGTAGCCGAAATTTAATAGCCCGATTAATTAGCCTCGTG  
CTGGGGTGTCTGTGATGGTAATCAACCCCACTTCTAACCAAGAGGTTGTTAGTTCCGAGTC  
TCTCCAAGATCAAGGTGGGAAGTTCTTGGAGGGAAGGATGCTGGGGTCTATTTGGAAC  
AGCCTCTTACCAAGGTAAGGTCTGTGTACACAGTACCCTCCCAGACCCCACTAAGT  
GGGATTAAAGTGGGTTATTGTTGTTGTTGTTGTTGCTGGATTGGATTCTTCTCAAGAG  
CTTTCTTAAGAATGGCGTGAAGCCTAGACTCCGGTTAAAGATGGAAGAACAATCAATCA  
TCTCTTAATAGTTGATTCCTGCAATATGATAAGTGATAGTTTATCCTATATAAAATCATGGA  
AGTAGGAAAACTAATGGAATGACCTTAAATATTTTGACCAAGAACCAACTTGCTGCTAT  
GTCCCTCCAATTTAGAACATTGAATCTCAGCAGCCATTCGTCAAACCATTCTTTTATGCC  
ATATATGTCAATATTTTGAAGGAACTTCTTCTTTGTCTTAAACATACCTTTCAATGCATTGT  
CAATGATTGAGACAAGTTTTTGAATGTTAAATAAAGTGATGATAATTATATCATCAACTTC  
GTATTTTAGTATACAATCATCTTCAACACCTAATCTTTTGTGTCAATCTACTCTTGTCTATC  
TGACCCTACAAAGAGATAAAGTTCATGACTTTCTTTTATAAACTACAGAATAAAGTTGACC  
GTCTGCAATTCTTCTCTATTTGATGAACTTATACATCTTTGTTACTGAATCACTGGATAA  
TTTTTATTGATAAAAGACAATCTTACTGACATAAGCATCTTATAATTGCATGTTATGGTAAC  
AGGATGGTGCCACAAGAATGGAAACTACTGCTTGTATACGAATACATGCCTAATGGCA  
GCCTAGATATGCACCTTTTTTTCGGGGCCAGATAAGCAGCCCCTGAGCTGGCATGTCCGC  
TACAAGATTATGCAAGGTGTTGCCTCAGCATTGCACTATCTGCACAATGAGTATGAGCAG  
AGGGTGGTCCATCGGATCTAAAGGCAAGTAACATAATGCTCGACTCTCAGTTCAATGC  
ACGCCTTGGGGATTTTGGCCTTGCACGAGCCCTTGACAACGAAAGGACCTCGTATGCTG  
AGGCCGAGGGAGTGCTTGGCACAATGGGATACATAGCACCAGAGTGTTTCCACTGG  
GAAAGCCACATACAATCTGATGTTTACGCATTTGGGGCCGTGTTGTTGGAAGTTGTATG  
CGGCCAAAGACCTGGAACCAAGGTTAATGGCTTTCAATTCTTTGTTGATTGGGTTTGGTA  
CTTGCATCGGGATGGTCGTATCCTAGAAGCTGTTGATCAAAGGCTTGGAGATGACTATG  
TTGCTGAAGAAGCAAAGAACTTCTGCTGTTAGGTTTGGCTTGTCTACATCCAATTGCAA  
GTGAGAGACCTAAAACACAGACAATAGTTCAGATTATATCAGGGTCCAGCACCAGCACCA  
GATGTTCCACATTTAAGCCAGCATTGTATGGCCATCTATGATGCCAATGGACATAGAT  
TCTAGTGTATGGACACAACATCTATTACAACCTTCTCACTTCAATTCAGGATGGAGTCTTG  
ACTATCAAAGCAGGGAGACCCCAACATATGCAGACCACCCCAACTCATTGGTGTAG



>NbS00020337g0016.1 GenBank ID: KT225334  
MGLLTAKKLTIFVLLCCLQLKIQAKLKTFFNREYLSFDETFNIFEVEKPATISNGALQVTPDSA  
SEDFELNNSGRILLKQPFKLWDGDISNNSRVASFNSSFLVNIYRPKNETAAEGLAFLISPDL  
EKPLNSQSQYLGLTNATSDGNSTNKVIAVELDTFKQNFDPDDNHIGIDIHSIRSVKYESLSSHG  
IELAPIGARFYNVVWVQYDGIKKILDVYIVEQAENKSTPPRPNNPILTYNLDLKDHNQESYFG  
FSASTGSNYQLNCVLRWNLTVVEYFPDKKHPWLKVVLGVGIPVVVLLLLGAAYLGYIYHRKRV  
DRSQSNILGALKSLPGTPQEYKFKALKKATNMFDEKNKLGQGGYGVVYRGFLAAEDKDIKAVK  
WFSRESIKGEDDFLAELTIINRLRHKHLVKLLGWCHKNGKLLLVEYMPNGSLDMHLFSGPD  
KQPLSWHVRYKIVQGVASALHYLHNEYEQRVVHRDLKASNIMLDSKFNARLGDFGLARALD  
NERTSYAEAEGVLGTMGYIAPECFHTGKATSQSDVYAFGAVLLEVCGQRPGTKVNGFQFF  
VDWVWYLHRDRILEAVDQRLGDDYVAEEAKKLLLLGLACSHPIASERPKTQTIVQIISGSAP  
TPEVPPFKPAFVWPSMMPDIDSSVMDTTSITTSHFNSGWSLDYQSRETPTYADHPNSLV

>NbS00020337g0016.1 GenBank ID: KT225334  
ATGGGATTATTGACCGCAAAAAACTCACCATTTTCGTCTTATTGTGCTGTCTTCAACTCA  
AAATTCAAGCCCAGAACTGAAAACCTTCAACAGAGAGTATCTATCTTTTGATGAAACCTT  
CTTTAACATATTTGAGGTTGAAAAGCCTGCAACAATCAGCAACGGTGCTCTTCAGGTGAC  
TCCTGACTCTGCATCTGAAGATTTGCAACTCAATAATAACTCAGGAAGAATCCTCTTGAAA  
CAGCCATTTAACTCTGGGATGGTGATATTTCAACAATAAAAGCAGGGTTGCATCTTTC  
AACTCTTCTTTCTTGTAATATTTATAGGCCAAAGAATGAAACAGCTGCTGAAGTTTAG  
CATTCTTGATTTCTCCAGATTTGGAGAAGCCACTCAATAGCCAAAGCCAATATTTGGGTTT  
GACAAATGCTACTAGTGATGAAATTCACAAATAAAGTTATTGCTGTTGAGCTTGATACT  
TTTAAGCAGAATTTGACCCTGATGATAACCATATTGGTATTGATATTCACAGTATTAGAT  
CTGTAAGTATGAATCTTTATCATCCCATGGGATTGAGCTTGCTCCTATTGGTGCAAGATT  
CTATAATGTTTGGGTACAATATGATGGTATCAAGAAAATTTCTTGATGTGTATATTGTAGAA  
CAAGCTGAAAAAATGGCTCTACACCACCTAGGCCAAATAACCCCATCTTAACATATAAT  
CTTGATTTAAAAGACCATGTGAATCAAGAATCATATTTGGATTTTCTGCATCAACTGGGA  
GTAATTACCAACTCAACTGTGTGCTGAGGTGGAACCTTAACAGTTGAGTATTTTCCAGATA  
AAAAGCATCCTTGGTTGAAGTTGTATTAGGGGTTGGAATTCAGTGGTGGTGTATTGC  
TACTTGGGGCAGCATATTTAGGGTATATTTATCACAGGAAAAGAGTTGATAGGTCACAGT  
CAAACATATTGGGTGCCCTAAAGAGTTTGCCTGGAACCCACAAGAGTATAAGTTCAAG  
GCTCTGAAAAAAGCTACTAACAATTTTATGATAAAGAATAAGCTTGGGCAAGGTGGATAT  
GGAGTGGTTTATAGAGGATTTTATAGCTGCTGAGGATAAAGATATTGCAGTCAAGTGGTTT  
TCAAGGGAAAAGTACAAAGGTGAAGATGATTTCTGGCTGAACCTACTATCATTAAATGTAG  
CTCAGGCATAAACATCTTGTCAAATTACTTGTAAGTCTTTTCATTTTTGTTTGAATGTAGA  
TATTGGAATGTTTCTTACCATGAATTTTCATCTGTTTGAAAAGAGTAAAGAGTTATGTTATG  
CATGTTTCTAGTATGATCTTGGTAGTAGGTTTCAGCGTGACAACATATTAGGTTTAAAAGCA  
GTTAGGAAAATGGTACTAATAGTTGTCCATCGTATAAGATAATACAAGAGAATGATCTTTT  
GATGGCAACTGCAAAGATTGCGTTCGCACACAGCTTTTAGCTAACCTTTGAGAGTCACAA  
TGAGGACACATCTCCAGTATTTCCATTGAAGTGATATAAATTTGTTACCTTTCTCGGAAA  
AAAAAATAGTCTGGTGCCTAACTCCCACTATGCGTTGGGTCCGGGGAAGGTGAGACC  
ACAAGGGTTTATTGTGCGCAACCTTACCCTGCATTTTTACAAGAGGTTATTTCCATGGCT  
CATACCCATGACCTTTTGGTGCATATAACAACGGTTTTTACCAATTACGCCATACTCTCCTTT  
ATCTTTCTTTAAAAAATTACTGGGTGCGAATTGTATGAAGGGGTTAATTGAATCCTCTT  
TGTTGGAGAAGTAAAGTGTGCAAATATGATAAAATTGATTCTTTTTATATAAAAAAAGTTT  
ACAGTATAGCAGGAAGTTGGTTCAAAAATATATTTAGGTCATGGGTTTGAATCCACTGTG  
ATAATCTTGCATTTTCTTAAATTTAGAATTTCTTCTCTGCCCTTCCATAATTAGGTGATAT  
AGACCGGGAGACGTGCTGCATTGGATTCACTAAAGTGAGAAACGCTTCCATCAAGAGT  
TTTCTAAAGGATGACTTGAAGCCTAGACTTCCGGTTAAAGATGGAGGAATCATATTCAT  
CACTTAATAGTTGATTCCAGCAATATGATAAGTGATAGTTTATGCCATATAACATCATGGA  
AGTAGGAAAACTAATGGTGACCAAGAACCAACTTGCTGCAATGTCCCATCCAATTTTGA  
ACATTGAATCTCCTCATATGATTTTCTTGAAGAGAACAAAAAGAAGATGATCATCTTTGG  
CTGACCGTGGAAATATGCCCTAAGCAGCCATTTCGTTAAACCATTTTTATGCCATATTTATAT  
GTCAATATTTGAGGAAGCTTCTTCTTGTCTAACATACCTTTCAATGCATTGTCAATG  
ATTGAGACAAGTTTTTGAATGTTAAATTAATGATGATAATTACATCCACTGAAAAGGACA  
TCAACTTCGATTTTAGTATACAGTCACTTCAAACACGTATTCTTTTGTGTCATCTACTCT  
TGTCATCTGACCCTACAAAGAGATAAAGTTTCGTGACTTCTTTTTATAAACTACAAAATGA  
AGTTGACCATCTGGAATTTGTTCTCTGTTTGATAAACTTATACATCTTGTTACTGAATCACT

GAATAATTTTTATTGATAAAAAACAATCTTACTGACATAAGCATCTTATAATTGCATGTT  
ATGGTAACAGGATGGTGCCACAAGAATGGAAAACACTGCTTGTATATGAATACATGCCT  
AATGGCAGCCTAGATATGCACCTCTTTTCGGGCCAGATAAGCAGCCGCTTAGCTGGCA  
TGTCCGCTACAAAATTGTGCAAGGTGTCGCCTCAGCATTGCACTATCTGCACAACGAGTA  
CGAGCAGAGGGTGGTGCATCGCGATCTAAAGGCAAGTAACATAATGCTCGACTCCAAGT  
TCAATGCGCGCCTTGGGGATTTTGGCCTTGACGTGCCCTTGACAACGAAAGGACCTCA  
TATGCTGAGGCTGAGGGAGTGCTTGGCACTATGGGATACATAGCACCAGAGTGTTTCCA  
CACCGGTAAGCCACATCGCAATCTGATGTTTACGCATTTGGAGCCGTGCTGTTGGAAG  
TTGTATGTGGCCAAAGACCTGGAACCAAGGTTAATGGCTTTCAATTCTTTGTTGATTGGG  
TATGGTACTTGCATCGCGACGGCCGTATCCTAGAAGCTGTTGATCAAAGGCTTGGAGAT  
GACTATGTTGCTGAAGAAGCAAAGAACTTCTGCTATTAGGTTTGGCTTGTCTACATCCA  
ATAGCAAGTGAGAGGCCTAAAACACAGACAATAGTTCAAATTATATCAGGGTCAGCACCA  
ACACCAGAAAGTTCCGCCATTTAAGCCGGCGTTTGTATGGCCATCTATGATGCCGACGGA  
CATAGACTCTAGTGTTATGGACACAACATCTATTACAACCTTCTCACTTCAATTCAGGATGG  
AGTCTTGACTATCAAAGCAGGGAGACCCCAACATATGCAGATCACCCCAACTCATTGGT  
GTAG

---

>NbS00006201g0004.1

MHFLSLQKLLTVTLFLILINSPLSSPFFPLNNVTLYGDASFTTNSIYLTQQRNCSSNSPSISAI  
GRAFYVYPIRFLDSLNTNTASFLCTFSFTILPTTPSCPFGDGFAFLISSDVDSLNTSNGYMG  
NRDSDMGDSFLAVEFDNDNDNHIGIGVKEVKFLASADVNLKSGKELTAWIEYKDSEKMMRVWI  
GYEMQIRPFNPVLATKIDISNQLKEFMRTGFTAKGSAVYSINRWRFRFTFGLLSSQTSWDHQS  
DEGDCLMCFPEEIGEHSFAPHHSKSLLLKIFVYGGGLAAVVTLVVVGILAIVSFVLRKRDGSR  
GENEGQMCRFQGNRVPQRLSLSEIKSATEGFNNERIIGEGGSAVVYEGDIPSKGTVAIKRFV  
QGTRLGPSHIPFNTEFASMVGCLRHKNLIQFQGWCCERNELVLYEFMPNGSLNKILHEHSH  
FAKFLTWERRLNIVLGVASALVYLHEECENQIIHRDVKTCNIMLDAEFNACVFA

>NbS00006201g0004.1 Corrected; GenBank ID: KT225335

MHFLSLQKLLTVTLFLILINSPLSSPFFPLNNVTLYGDASFTTNSIYLTQQRNCSSNSPSISAI  
GRAFYVYPIRFLDSLNTNTASFLCTFSFTILPTTPSCPFGDGFAFLISSDVDSLNTSNGYMG  
NRDSDMGDSFLAVEFDNDNDNHIGIGVKEVKFLASADVNLKSGKELTAWIEYKDSEKMMRVWI  
GYEMQIRPFNPVLATKIDISNQLKEFMRTGFTAKGSAVYSINRWRFRFTFGLLSSQTSWDHQS  
DEGDCLMCFPEEIGEHSFAPHHSKSLLLKIFVYGGGLAAVVTLVVVGILAIVSFVLRKRDGSR  
GENEGQMCRFQGNRVPQRLSLSEIKSATEGFNNERIIGEGGSAVVYEGDIPSKGTVAIKRFV  
QGTRLGPSHIPFNTEFASMVGCLRHKNLIQFQGWCCERNELVLYEFMPNGSLNKILHEHSH  
FAKFLTWERRLNIVLGVASALVYLHEECENQIIHRDVKTCNIMLDAEFNAKLGDFGLAEVFDN  
SRTRDATVPAGTMGYLAPEYVFSGVPTVKTDVYSFGVVVLEVASGRKPIDECGGLTTDWWW  
DLWEKGRITEAADPKLKRFLKNEMDRVLVGLSCVHPNQEKRPRMREVSRLMKDEAPLPI  
LPPKPSVRIQSVLPEGCEEIMNCAGKMEDSPWATPRTHFSRN

>NbS00006201g0004.1 Corrected; GenBank ID: KT225335

ATGCATTTTTCTTTGCAAAAACCTTTAACAGTCACTCTATTTCTCATCTTAACCATCAATTC  
ACCTTCCCTTTCATCTCCTTTCTTCCCTCTTAACAATGTAACCTTTACGGTGACGCTTCT  
TTCACCACCAACTCCATTTACCTCACTCAACAGCGCAACTGTTTCATCAAATTCACCTTCCA  
TTTCTGCCATTGGTAGAGCTTTCTATGTTTACCCATTGTTTTCTTGATTCTTTAACAAT  
AACACTGCTTCTTTCTTATGCACCTTTCTCTTTTACTATTCTCCCTACTACCCCTTCTTGCCC  
TTTTGGTGATGGCTTTGCCTTTTTGATCAGTTCTGATGTTGATTCTTTGACCAACTCTAAT  
GGTTACATGGGTCTTCCCAATCGAGATTCTGACATGGGAGATTCACTTCTGGCCGTGGA  
ATTTGATACAAACGATAATCATATTGGTATTGGTGTTAAAGAAGTTAAGTTTTTGGCTTCT  
GCTGATGTTGATTTGAAAAGTGGGAAAGAATTGACGGCTTGGATTGAGTATAAAGATTCT  
GAAAAAATGATGAGAGTTTGGATTGGTTATGAAATGCAAATTAGGCCTTTAATCCTGTTT  
TCGCTACTAAAATTGACATTTCCAATCAGTTGAAGGAGTTTATGAGAAGTGGTTTCACTGC  
AAAAGGCTCTGCAGTTTACAGCATTAAATCGTTGGCGATTGAGAACGTTCCGATTGCTTTC  
GTCTCAAACGTCTTGGGATCATCAATCCGATGAAGGAGATTGCTTGATGTGTTTTCTGA  
GGAATTGGTGAGCATTCTTCTGCCCTCATCATAGTAAAAGTTTACTGAAATTGATTTTT  
GTATATGGTGGCTTAGCTGCAGTTGTTACACTTGTGTTGGTATTCTGGCTATTGTGTCT  
GTTTTTGTGTTAAGGAGAAAAAAGGGATGGTAGTAGAGGGGAAAATGAAGGTCAAAT  
GTGTAGATTCCAAGGAAATAGAGTGCCTCAAAGATTGTCAATTATCTGAAATAAATCAGC  
CACAGAAGGATTTAATAATGAAAGGATAATTGGTGAAGGAGGATCTGCTGTTGTATATGA  
AGGAGATATTCCTTCTAAGGGAAGTGTGCTATTAAGAGATTTGTTCAAGGGACTAGATT

AGGTCCTTCACATATTCCATTTAACACTGAATTTGCTTCTATGGTTGGCTGCTTAAGACAC  
AAGAATTTGATTCAGTTCCAAGGATGGTGTGTGAGAGGAATGAGTTGGTTTTAGTTTAT  
GAATTCATGCCTAATGGTAGCCTTAACAAAATCCTACACGAACACTCGCATTGCTAAG  
TTTCTGACATGGGAGCGAAGGCTGAATATAGTTCTTGGCGTTGCGTCTGCTCTGGTGTAT  
TTGCATGAAGAGTGTGAGAATCAAATAATTCATAGAGATGTGAAGACTTGTAAATAATGC  
TTGATGCTGAGTTCAATGCTAAGCTTGGGGATTTCCGGTTAGCTGAAGTGTGATAATT  
CCAGGACAAGGGATGCTACTGTACCAGCTGGAACAATGGGATATTTAGCTCCTGAATAC  
GTCTTTTCTGGCGTTCCAAGTGTCAAACGGATGTGTATAGCTTTGGTGTGTTGGTACTA  
GAAGTAGCATCGGGGAGAAAAGCCTATCGATGAATGTGGGGGTTTACTACTGATTGGGT  
GTGGGATTTGTGGGAAAAGGGGAGGATAACTGAGGCTGCTGATCCGAACTAAAGGA  
CGTTTTCTGAAGAACGAGATGGATAGGGTGCTCGTCGTGGGACTTTCTTGTGTGCACCC  
TAATCAGGAGAAGAGGCCGAGAATGAGGGAAGTTTCCCGTATGCTTAAAGATGAAGCTC  
CCCTGCCATTTTGCCTCAAAGAAACCAAGTGTGAGAATCAATCTGTTTTACCAGAGG  
GATGTGAAGAAATCATGAATTGTCTGAAAAATGGAGGATAGCCCATGGGCAACTCCA  
AGAACTCATTTTAGCAGGAAGT

>NbS00021029g0001.1

MHFLSLQKLLTVTLFLVLTINSPSLSSPFSPLNNVTVYGDASFNTNSICLTQQRNCSSNSPISAI  
GRAFYVYPIRFLDSLNTASFLCTFSFTILPTTPSCPFGDGFAFLISSDVSLSNSNGYMG  
KQDSDMGDSFLAVEFDTNDNHIGIGVKEVKFLVSADVNLKSGKELTAWIEYKDSEKMMRVW  
GYEMQIRPFNPVLATKIDISNQLKEFMRIQFTAKGSVVYSINRWRFRFTFGLSSQTSWDHQS  
DEGDCLMCFPEEIGEHSAPHHGKSLKLIFFVYGGAAVTVLVGLVLAIVSVFVLRKRKRDSS  
RGDNEGQMCRLQGNRVPQRSLSEIKSATEGFNNERIIEGGSSAVVYEGDIPSKGTVAIKRF  
VQGTRLGSPSHIPNTEFA

>NbS00021029g0001.1 Corrected; GenBank ID: KT225336

MHFLSLQKLLTVTLFLVLTINSPSLSSPFSPLNNVTVYGDASFNTNSICLTQQRNCSSNSPISAI  
GRAFYVYPIRFLDSLNTASFLCTFSFTILPTTPSCPFGDGFAFLITSDVSLNSNSNGYMG  
KQDSDMGDSFLAVEFDTNDNHIGIGVKEVKFLVSADVNLKSGKELTAWIEYKDSEKMMRVW  
GYEMQIRPFNPVLATKIDISNQLKEFMRIQFTAKGSVVYSINRWRFRFTFGLSSQTSWDHQS  
DEGDCLMCFPEEIGEHSAPHHGKSLKLIFFVYGGAAVTVLVGLVLAIVSVFVLRKRKRDSS  
RGDNEGQMCRLQGNRVPQRSLSEIKSATEGFNNERIIEGGSSAVVYEGDIPSKGAVAIKRF  
VQGTRLGSPRIPNTEFASVMGCLRHNLIQLQGWCCERNELVLYEFMPNGSLNKLHEHS  
HFAKFLTWERRLNIVLGIASALVYLHEECENQIIHRDVKTCNIMLDAEFNAKLGDFGLAEVFDN  
SRTRDATVPAGTMGYLAPEYVFSGVPTVKTDVYSFGVVVLEVASGRKPIDECGLITDWWV  
DLWEKGRITEAADPKLNRFQKNEMDRVLVGLSCVHPNEEKRPKMREVARMLKEEAPLPI  
LPPKKPTVRIQSVLPEGCEEIMNCAGKLEDSPWATPRTHFSRN

>NbS00021029g0001.1 Corrected; GenBank ID: KT225336

ATGCATTTTCTTTGCAAAAACCTTTAACAGTCACTCTGTTTCTCGTATTAACCATCAATTC  
ACCTTCCCTTTCATCTCCTTTCTCCCCTCTTAACAATGTAAGTGTACGGCGACGCTTCT  
TTCACCACCAACTCCATTTGCCTCACTCAACAACGCAACTGTTTCAATCAATTCACCTTCCA  
TTTCTGCCATTGGTAGAGCTTTCTATGTTTACCCAATTCGTTTTCTTGATTCTTTAACAAAT  
AACACTGCTTCTTTCTTATGCACCTTTCTCTTTTACTATTCTCCCTACTACCCCTTCTTGCCC  
TTTTGGTGATGGCTTTGCCTTTTTGATCACTTCTGATGTTGATTCTTGTCCAACCTTAAT  
GGTTACATGGGTCTTCAAAGCAAGATTCTGATATGGGAGATTCACTTCTTGCCCGTGGAA  
TTTGATACAAACGATAATCATATAGGTATTGGTGTAAAGAAGTTAAGTTTTTGGTTTCTG  
CTGATGTTAATTTGAAAAGTGGGAAAGAATTGACGGCTTGGATTGAGTATAAAGATTCTG  
AAAAATGATGAGAGTTTGGATTGGTTATGAAATGCAAATTAGGCCTTTTAACTCCTGTTCT  
CGCTACTAAAATAGACATTTCCAATCAGTTGAAGGAGTTTATGAGAATTGGTTTCACTGCA  
AAAGGCTCTGTAGTTTACAGCATAATCGTTGGCGATTGAGAACTTTCCGATTGCTTTCC  
TCTCAAACGTCTTGGGATCATCAATCTGACGAAGGAGATTGCTTGTGTTTTCTGAG  
GAAATAGGTGAGCATTCTTCTGCCCCGCATCATGGTAAAAGTTTACTGAAATTGATTTTTG  
TATATGGTGGCTTAGCTGCAGTTGTTACACTTGTGTTGGTGTCTGGCTATTGTGTCTG  
TTTTTGTGTTAAGGAGAAAAAAGGGATAGTAGTAGAGGGGATAATGAAGGCCAAATGT  
GTAGATTACAAGGAAATCGAGTGCCTCAAAGATTGTCATTATCTGAAATAAATCAGCCA  
CAGAAGGATTTAATAATGAAAGGATAATTGGTGAAGGAGGATCTGCTGTTGTATATGAAG  
GAGATATTCCTTCTAAAGGAGCTGTTGCAATTAAGAGATTTGTTCAAGGGACTAGATTAG  
GTCCTTACAGTATTCATTTAATACTGAATTTGCTTCAATGGTTGGTTGCTTAAAGACACAA  
GAATCTGATTCAGCTCAAAGGATGGTGTGTGAGAGGAATGAGTTGGTTTTAGTTTATGA

ATTCATGCCTAATGGTAGCCTTAACAAAATCCTACACGAGCACTCGCATTGCTAAGTTT  
TTGACGTGGGAGCGAAGGCTGAATATAGTTCTTGGCATTGCGTCTGCTCTGGTGTATT  
GCATGAGGAATGTGAGAATCAGATAATTCATAGAGATGTGAAGACTTGAATATAATGCT  
TGATGCTGAGTTCAATGCTAAGCTTGGGGATTTTCGGTTTAGCTGAAGTGTGATAATTC  
TAGGACAAGGGATGCTACTGTACCAGCTGGAACAATGGGATATTTAGCTCCTGAATACG  
TCTTTTCTGGCGTTCCAACGTGTTAAAACGGATGTGTATAGCTTTGGTGTGTTGGTACTAG  
AAGTAGCATCAGGGAGAAAAGCCTATCGATGAATGTGGGGGTTTATTACTGATTGGGTG  
TGGGATTTGTGGGAAAAGGGGAGGATAACTGAGGCTGCTGATCCAAAATAAATGGACG  
CTTTCAGAAGAACGAGATGGATAGGGTGTCTCGTGTAGGACTTTCTTGTGTGCACCCTA  
ATGAGGAGAAGAGGCCGAAAATGAGGGAAGTTGCCCGTATGCTTAAAGAAGAAGCTCCA  
CTGCCCATTTTGCCTCAAAGAAACCAACTGTGAGAATCAATCTGTTTTACCAGAGGGA  
TGTGAAGAAATCATGAATTGTGCTGGAAAATTGGAGGATAGCCCATGGGCAACTCCAAG  
AACTCATTTTAGCAGGAATTAG

---

>NbS00007030g0016.1

MSKLFSCSIFFSFLYCALLVSAQNCSFDLESFTLRNFTLLGDSYLRNGVVGLTRELQVPSSSS  
GSLIYNNPISFFDPESKKIVSFSTRFAFSVNNINPSSFGVTPFHSLIKNLKRLFAFSVNNINPSSF  
GDGLAFFLSPDNQTLGSPGGFLGLVNSSLTKNKFVAVFEFDRQDLHFNDPDDNHVGLDID  
SLISIKTANVKLAGVDLKLITSWIDYKSEEKQLLVFLSYSSSKSKKPLLTVDIDLSHYLKEFMYV  
GFAASTEGLSTELHCINWSFQTFGFSPMRPRHNPVDNSVSVLKPPTIQEDSDNKHHKRL  
GLGLGIAGPAFFCAVLVAFGWISLQKWRGLNTEKNLTAELVTGPRQFSYKELRSATRGFHSS  
RIIGNGAFGTVYKAFFMDSSSIAAVKRSKHSHEKTEFGAELSIACL RHKLNVLQQLGWICIEK  
ELLLVYDFMPNGSLDKVLYQESENGNPLKWPYRYNIAVGLASVLTYLHQECEQQVIHRDIKA  
SNIMLDVSCII

>NbS00007030g0016.1 Corrected; GenBank ID: KT225337

MSKLFSCSIFFSFLYCALLVSAQNCSFDLESFTLRNFTLLGDSYLRNGVVGLTRELQVPSSSS  
GSLIYNNPISFFDQESKKTVSFSTRFAFSVNNINPSSFGDGLAFFLSPDNQTLGSPGGFLGLV  
NSSLTKNKFVAVFEFDRQDLHFNDPDDNHVGLDIDSLISIKTANVKLAGVDLKLITSWIDYKS  
EEKQLLVFLSYSSSKSKKPLLTVDIDLSHYLKEFMYVGF AASTEGLSTELHCINWSFQTFGFS  
PMRPRHNPVDNSVSVLKPPTIQEDSDNKHHKRLGLGLGIAGPAFFCAVLVAFGWISLQK  
WRGLNTEKNLTAELVTGPRQFSYKELRSATRGFHSSRIIGNGAFGTVYKAFFMDSSSIAAVK  
RSKHSHEKTEFGAELSIACL RHKLNVLQQLGWICIEKGELLLVYDFMPNGSLDKVLYQESEN  
GNPLKWPYRYNIAVGLASVLTYLHQECEQQVIHRDIKASNIMLDVSYNARL GDFGLARLMDH  
DKSPVSTLTAGTMGYLAPEYLQYGKATERTDVFSYGVVILEVACGRRPIEGEGSGHEMVNLV  
DWVWRLYSEGRIEEEADKRLNGDFKEEEMRKL LVLGLSCANPDSMERPCMRRVFQILNNEA  
EPIFVPKVKPMLTFSTSLPFSINDIFSDDEDNEAAPEPEFEIRVD

>NbS00007030g0016.1 Corrected; GenBank ID: KT225337

ATGAGTAAGCTTTTTCTTGCTCCATTTCTTCAGCTTCTTGTACTGTGCACTATTGGTAT  
CAGCACAAAATTGCAGCTTTGATTTGGAATCTTTTACACTGAGAAATTTCACTTCTTGG  
AGATTCTTATCTCAGAAATGGGGTTGTGGGTCTAACAAGAGAGCTTCAAGTTCCATCTTC  
AAGCTCTGGTTCTCTCATTACAATAACCCCATTTTATTCTTTGATCAAGAATCTAAAAAG  
ACTGTTTCTTTTCCACAAGATTTGCTTTTTTCAAGTCAATAACATCAATCCATCTTCAATTTGG  
AGATGGTTTGGCCTTTTCTTTTACCTGATAATCAGACTTTAGGCAGTCCAGGTGGTTT  
CTTGGGTCTGGTTAATTCATCACAATTAACCAAGAACAAGTTTGTGCTGTTGAGTTTGAC  
ACTAGGCAAGATTTACTTTAATGATCCTGATGATAACCATGTAGGTCTTGATATTGATA  
GCCTTATCTCAATCAAGACTGCTAATGTAAAGTTGGCTGGTGTGATCTCAAAGTGGA  
ATTTGATTACTTCTTGGATTGATTACAAGAGTGAGGAGAAGCAGTTGTTAGTGTCTTGA  
GTTACTCAAGTTCCAAGTCTAAAAACCACTCTTACTGTGGATATTGACCTGTCTCATT  
TCTAAAGGAGTTTATGTATGTGGGGTTTGTGCTTCTACTGAGGGAAGCACTGAATTGCA  
TTGATTGAGAATTGGAGTTTTCAAATTTTGGATTTAGTCTATGAGGCCAAGGCATAAT  
CCCATGATGTGTCTGATAATTCTGTGTTAGTAAACCCCTACTATTCAAGGAAGATTCT  
GACAATAAACATCATAAGAGGTTAGGTTTGGGTCTTGGAAATTGCTGGTCCAGCTTTCTTT  
TGTGCTGTTCTTGTAGCTTTTGGTTGGATTTCTTTACAGAAATGGAGGGGCCTTAACACA  
GAGAAGAATTTGACAGCTGAGCTTGTACTGGACCAAGGCAGTTTAGCTACAAGGAAT  
GAGGTCAGCTACAAGAGGATTTTATTCAAGTAGGATCATAGGCAACGGCGCTTTTGGTA  
CTGTTTACAAGGCCTTTTTCATGGATTGAGCTCTATCGCTGCAGTGAAAAGATCTAAGC  
ACAGCCACGAAAGTAAACTGAGTTTCGGAGCTGAACTGTGATCATAGCATGTTTAAAGG  
CACAAGAATTTAGTTCAAGTTGCAAGGGTGGTGCATTGAGAAGGGAGAATTACTTCTTGTG

TATGACTTTATGCCAAATGGGAGTCTTGATAAGGTACTATACCAAGAATCTGAGAATGGG  
AATCCACTGAAATGGCCTTATAGGTATAATATAGCAGTTGGTTTGGCCTCTGTGCTGACT  
TATTTGCATCAAGAATGTGAGCAGCAAGTGATTCACAGAGATATTAAGCAAGCAATATT  
ATGCTTGATGTCAGCTACAACGCGAGGCTTGGCGATTTTTGGGTTGGCAAGACTTATGGA  
TCATGACAAGAGTCCAGTCTCGACTCTTACAGCTGGAACAATGGGATACCTTGCTCCTGA  
GTACCTTCAATATGGAAAGGCAACCGAGAGAACTGATGTTTTTCAGCTATGGCGTGGTTAT  
ACTAGAAGTGGCTTGTGGGAGGAGGCCAATAGAGGGGAGAAGGGAGTGGTCATGAAATG  
GTTAATTTGGTTGATTGGGTTTTGGAGGCTTACTCTGAAGGTAGGATAATTGAAGCAGCA  
GACAAAAGGCTAAATGGTGACTTCAAAGAGGAAGAGATGAGAAAAGCTTCTACTTGTCCG  
TTTAAGCTGTGCAAATCCTGATAGTATGGAAAGACCTTGTATGAGAAGAGTATTTTCAGAT  
CCTCAACAATGAAGCTGAACCTATCTTTGTTCCGAAAGTGAAACCGATGCTAACTTTCTC  
CACTAGTCTGCCTTTTCAGTATTAATGACATTTTCTCAGACGACGAAGACAATGAGGCAGC  
ACCAGAACCTGAGTTTGAATCAGAGTAGATTGA

>NbS00020348g0007.1

MSKLFSCSIFFSFLYCALLVSSQNC SFDLQSFTLRNFTLLGDSYLRNGVVGLTRELQVPSSSS  
GSLIYNPNPISFFDPESKKIVSFSTRFAFSVNNINPNVSVFFDPESKKIVSFSTRFAFSVNNINPS  
SFGDGLAFFLSPDNQTLGSPGGFLGLVNSSLTKNKFVAVFDTWQDLHFNDPDDNHVGLD  
IDSLISIKTANVKLAGVDLKSRLNITSWIDYKSEEKQLFVFLSYSSSKPKKPLLTVDIDLSDYLKE  
FMYVGF AASTEGSTEMHC IENWSFQTFGFSPMRPRHNP HNVS DNSV LVK PPTIQEDSDNKH  
NKRLGLGLGIAGPAFFCAVLVAFGWISFKKWRGLHTVKNLTAELVTGPRQFSYKELRSATRG  
FHSSRIIGNGAFGTVYKAFFMDSSSIAAVKRSKHSKTESFGAELSIIACLRHKNLVQLQGW  
CIEKGELLLVYDFMPNGSLDKVLYQSENGNPLKWPYRYNIAVGLASVLTYLHQECEQQVIH  
RDIKASNIMLDVSYNARLEMRKLLLVGLSCANPDSMERPCMRRVFQILNNEAELIFVPKVKPT  
LTFSTSLPFSINDIFSDDDEDNEAAPEPEFEIRVD

>NbS00020348g0007.1 Corrected; GenBank ID: KT225338

MSKLFSCSIFFSFLYCALLVSAQNC SFDLESFTLRNFTLLGDSYLRNGVVGLTRELQVPSSSS  
GSLIYNPNVSVFFDPESKKIVSFSTRFAFSVNNINPSSFGDGLAFFLSPDNQTLGSPGGFLGLV  
NSSLTKNKFVAVFDTWQDLHFNDPDDNHVGLDIDSLISIKTANVKLAGVDLKSRLNITSWI  
DYKSEEKQLFVFLSYSSSKPKKPLLTVDIDLSDYLKEFMYVGF AASTEGSTEMHC IENWSFQTF  
FGFSPMRPRHNP HNVS DNSV LVK PPTIQEDSDNKH NKRLGLGLGIAGPAFFCAVLVAFGWIS  
LQKWRGLNTEKNLTAELVTGPRQFSYKELRSATRGFHSSRIIGNGAFGTVYKAFFMDSSSIA  
AVKRSKHSKTESFGAELSIIACLRHKNLVQLQGW CIEKGELLLVYDFMPNGSLDKVLYQES  
ENGNPLKWPYRYNIAVGLASVLTYLHQECEQQVIHRDIKASNIMLDVSYNARLGDFGLARLM  
DHDKSPVSTLTAGTMGYLAPEYLQYGKATERTDVSYGVVILEVACGRRPIEGEGSGHEMV  
NLVDWVWRLYSEGRIEEEADKRLNGDFKEEEMRKLLLVGLSCANPDSMERPCMRRVFQILN  
NEAELIFVPKVKPTLTFSTSLPFSINDIFSDDDEDNEAAPEPEFEIRVD

>NbS00020348g0007.1 Corrected; GenBank ID: KT225338

ATGAGTAAGCTTTTTTCTTGCTCCATTTTCTTCAGCTTCTTGTACTGTGCACTATTGGTAT  
CAGCACAAAATTGCAGCTTTGATTTGGAATCTTTTACACTGAGAAATTTCACTTCTTGG  
AGATTCTTATCTCAGAAATGGGGTTGTGGGTCTAACAAGAGAGCTTCAAGTTCCATCTTC  
AAGCTCTGGTTCTCTCATTTACAACAACCCCGTTTCATTCTTTGATCCAGAATCTAAAAG  
ATAGTTTCTTTTTCCACAAGATTTGCGTTTTTCAGTCAATAACATCAATCCATCTTCATTTGG  
AGATGGTTTGGCTTTTTTCTTTTACCTGATAATCAGACTTTAGGTAGTCCAGGTGGTTTC  
TTGGGTCTGGTTAATTCATCCCAATTGACTAAGAACAAGTTTGTGCTGTTGAGTTTCGAC  
ACTTGGCAAGATTTGCACTTTAATGATCCTGATGATAACCATGTAGGTCTTGATATAGATA  
GCCTTATCTCAATCAAGACTGCTAATGTAAAGTTGGCTGGTGTGATCTCAAAGTAGGA  
ATTTGATTACTTCTTGGATTGATTACAAGAGTGAGGAAAAGCAGTTGTTTGTGTTCTTGAG  
TACTCAAGTTCCAAGCCTAAAAAACCCTCTTGACTGTGGATATTGACCTGTCTGATTAT  
CTAAAGGAGTTTATGTACGTGGGGTTTGTGCTTCTACTGAGGGAAGCACTGAAATGCAT  
TGATTGAGAATTGGAGTTTTCAAACTTTTGGATTTAGTCCTATGAGGCCAAGGCATAATC  
CCCATAATGTGTCTGATAATTCTGTGTTAGTGAAACCCCTACTATTCAGGAAGATTCTGA  
CAATAAACATAATAAGAGGTTAGGTTTGGGTCTTGGAAATTGCTGGTCCAGCTTTCTTTTGT  
GCTGTTCTTGTAGCTTTTGGTTGGATTTCTTTACAGAAATGGAGGGGCCTTAACACAGAG  
AAGAATTTGACAGCTGAGCTTGTTACTGGACCAAGGCAGTTTAGCTACAAGGAAGTCTGAG  
GTCAGCTACAAGAGGATTTTCAATCAAGTAGGATCATAGGCAACGGCGCTTTTGGTACTGT  
TTACAAGGCCTTTTTTTCATGGATTTCGAGCTCTATCGCTGCAGTGAAAAGATCTAAGCACAG  
CCACGAAAGTAAAACCTGAGTTCCGGAGCTGAACTGTGATCATAGCATGTTTAAGGCACAA

GAATTTAGTTCAGTTGCAAGGGTGGTGCATTGAGAAGGGAGAATTACTTCTTGTCTATGA  
CTTTATGCCTAATGGGAGTCTTGATAAGGTACTATAACCAAGAATCTGAGAATGGGAATCC  
ACTGAAATGGCCTTATAGATATAATATAGCAGTTGGTTTGGCCTCTGTTCTGACTTATTTG  
CATCAAGAATGTGAGCAGCAAGTGATTCACAGAGATATTAAGCAAGCAATATTATGCTT  
GATGTCAGCTACAACGCGAGGCTTGGCGATTTTGGGTTGGCAAGACTTATGGATCATGA  
CAAGAGTCCAGTCTCGACTCTTACAGCTGGAACAATGGGATACCTTGCTCCTGAGTACC  
TTCAATATGGAAAGGCAACCGAGAGAACTGATGTTTTAGCTATGGCGTGGTTATACTAG  
AAGTGGCTTGTGGGAGGAGGCCAATAGAGGGGAGAAGGGAGTGGTCATGAAATGGTTAA  
TTTGGTTGATTGGGTTTGGAGGCTTTACTCTGAAGGTAGGATAAATTGAAGCAGCAGACAA  
AAGGCTAAATGGTGACTTCAAAGAGGAAGAGATGAGAAAGCTGCTACTTGTCCGGTTTAA  
GCTGTGCAAATCCTGATAGTATGGAAAGACCTTGATGAGAAGAGTATTTTCAAGATCCTCA  
ACAATGAAGCTGAGCTTATCTTTGTTCCAAAAGTGAAACCGACGCTAACTTTCTCCACTA  
GTCTGCCTTTCAGTATTAATGACATTTTCTCAGATGACGAAGACAATGAGGCAGCACCCAG  
AACCTGAGTTTGAATCAGAGTAGATTGA

---

>NbS00029224g0003.1 GenBank ID: KT225339  
MDYYYWYFFLFAVLVNLVASAPTGPVINVTKHISFQDFSSKNPRLKQDLTLLGSAIVSDEKST  
VQIPDPEQEGDLKHLGRAIYSSPIRFFDPLSQTPASFETTFQFQVLKSNSSNWTSDLGES  
VGGSGLTFIIVPELTVGRSGPWLGMLNDLCCDDYKSVAI EFDTRQNPEFGDPNDNHLGINL  
GSIVSTAAINASDVG VQLNDGSIHRVWISYDQRRFIDIRLAPDGRGFPSKSVYSGFLDLSPY  
LNEYMFVGFSAATGNLAQIHNVL SWNFTSVSQASLRIPSTETCQNKIMLQNNQTAETAHRKT  
PNSFFIFLAVVILLVIVLVNLYFSSYKRDDNSSETIILPEKKQRPRPPNKARRFTIAEISVATRF  
SELQILGSDEKSVTYKATMLNGCNVVKRFLTQFFNTHGFDKRRFHKEIKAISSIRHPNLVPV  
RGWCYDNRETIVVYDIPNGSLDKWLFVGVLPWTRRFKVVKDLADSLVYLHSLQLAHKNV  
KSSSAFLDVSFRAVMGDFGFVLT SAGSTRFESMVSQTADVFEFGVVVLETVAGRSRKS NPG  
ERDLLDLAWAMHEVQQKETLVDRRMGAVVNLEQAIRVLDIGLLCTLNENKGRPTIEEVVEFL  
NMEKPIPELPPGRPVCLFPYNSTTGLCSGYACTAF

>NbS00029224g0003.1 GenBank ID: KT225339  
ATGGACTACTACTGGTACTTTTTCTGTTTGGCGTACTTGTTAATTTAGTTGCATCAG  
CTCCAACCGGACCTGTAATTAACGTGACTAAGCATATTTCTGTTCCAAGATTTCAAGTTCAA  
AAATCCAAGATTGAAGCAAGATCTTACACTTCTTGGCAGTGCTATCGTCTCAGATGAAAA  
ATCAACAGTTCAAATTCCTGACCCTGAACAGGAAGGTGATCTTAAGCATTAGCAGGGCG  
AGCTATATACTCTTACCTATTCGTTTCTTCGATCCTCTGTCTCAAACACCAGCTTCATTT  
GAAACAACCTTCTCATTTCAAGTATTGAAGTCCAATTCGAGCAACTGGACATCA  
GATCTTGGCGAATCTGTTGGTGGTAGCGGCCTTACTTTTATCATAGTCCCTGATGAATTG  
ACAGTTGGCCGCTCTGGTCCGTGGCTTGGCATGCTCAACGATCTATGCGACGACGATTA  
TAAGTCAGTAGCTATTGAGTTTGATACACGGCAGAATCCTGAATTTGGTGATCCAAATGA  
CAATCACTTGGGCATCAATTTAGGAAGCATAGTTTCAACTGCAGCAATAAATGCTTCTGA  
CGTTGGAGTCCAACCTGAATGACGGATCAATTCACAGGGTTTGGATATCTTACGATGGGC  
AGAGGCGATTTATCGACATCCGTCTTGCACCTGATGGCAGAGGATTTCTTCTAAATCAG  
TCTACTCTGGTTTTCTTGACCTCTCGCCTTACTTAAATGAGTACATGTTCTGATGATTTTC  
AGCTGCAACTGGTAACCTTGCACAAATCACAATGTCCTGTCTGGAATTTCACTTCAGT  
TAGTCAAGCTTCCCTTAGAATTCCTTCAACAGAGACATGTCAGAATAAATCATGCTTCAA  
AATAATACCCAAGCTGAACTGCACATCGGAAAACGCCTAATAGTTTCTTTATTTTCTTGG  
CTGTTGTCTATTCTTAGTAATTGTTCTTGTAAATCTCTATTTTAGTAGCTACAAGCGAGAT  
GACAATTCAGTGAAACAATCATTCTGCCGAGAAAAAGCAAAGACCAAGGCCACCAAAA  
TAAAGCACGTCGCTTACAATAGCCGAAATCTCAGTCGCAACAAGGAATTTCAAGTGAAGT  
ACAAATATTGGGCAGTGATGAGAAGAGCGTTACTTATAAGGCTACGATGCTGAACGGGT  
GCAATGTTGTTGTAACGATTTTTAACTCAGTTTTTCAATACCCATGGGTTTGACAAGCG  
AAGATTTACAAGGAAATTAAGGCCATCAGCAGTATTCGCCACCCGAATTTGGTCCCGT  
TAGAGGATGGTGCTATGACAACCGAGAACTATAGTTGTTTACGATTACATCCCAAACGG  
TAGCCTAGACAAATGGTTGTTTGGTGTGCGGTGATTACCTTGGACGAGGCGTTTTAAGGT  
TGTTAAAGATTTAGCAGACTCTCTTGTTTACCTACACTCGAAGCAACTTGCTCACAAGAAC  
GTGAAAAGTAGCAGTGCGTTTCTTGACGTGAGCTTCAGAGCAGTGATGGGTGATTTTGG  
ATTTGTGCTCACTTCGGCTGGGTCAACTCGGTTTGAAGTCCATGGTGAGTCAAACAGCAG  
ACGTGTTTCGAGTTTGGAGTTGTTGTGCTAGAACTGTTGCGGGTCGGAGCAGGAAGTCC  
AACCCGGGAGAACGTGACTTGTGGATCTTGCATGGGCCATGCATGAGGTACAACAGAA  
GAAACGTTAGTGGATCGAAGAATGGGCGCGGTTGTAACCTGGAGCAGGCGATTCCG  
GTATTGGATATCGGGTTGCTATGTACATTGAACGAGAACAAAGGAAGACCTACAATAGAA

GAAGTGGTAGAGTTCCTGAATATGGAGAAACCAATTCCTGAGCTGCCACCGGGTCCGACC  
CGTTTGTGGTTCCCGTATAACAGCACACAGGTCTGTGCAGTGGGTACGCCTGCACTG  
CATTCTAA

---

>NbS00001395g0006.1 GenBank ID: KT225340  
MDYYYWFFFLFAVLINLVAAAPTGPVINVTKHIAFQDFSSKNPRLKQDLTLLGSAIVSDEKSTV  
QIPDPEQEGDLKHLAGRAIYASPIRFFDPLSQTPASFETTFQFQVVKSNSSNGTSDLGKYV  
GGSGFTFIIVPELTLGRSGPWLGMNLDCDDDYKSVVIEFDTRRNTEFGDPNDNHLGINLG  
SIVSTAANASDVGVQLNDGSIHRVWISYNGQRRFIDIRLAPDGRGYPKSVYSGFLDLSPYL  
NEYMFVGFSAATGNHTQIHNVLWNFTSVCQASLRIPSTETCQNQIMLQNNTQAETTHRKT  
NSFFIFLAVVILLVIVLINLYFSSYKRNDNSSETIILPEKKQRPRPPNKARRFTIAEISVATRN  
LQILGSDEKSITYKATMLNGCNVVKRFLTQFFNTHGFDKQRFHKEIKAISSIRYPNLVPLRGW  
CYDNQETIVVYDYIPNGSLDKWLFVGVLPWTRRFKVVKDLADSLVYLHSLAHKLVKSSS  
VFLDVSFRAVVGDFGVLTSAAGSTRFESMVSQTADVFEFGVVLETVAGRSRKSNGERDL  
LDLAWAMHEVQKQKTLVDRRMGAVVNLEQAIRVLDIGLLCTLNENKGRPTMEEVVEFLNME  
NPIPELPSGRPVCLFPYNSTTGLCSGYACTAFK

>NbS00001395g0006.1 GenBank ID: KT225340  
ATGGACTACTACTGGTCTTTTTCTGTTTCCGCTACTTATTAATTTAGTTGCAGCAG  
CTCCAACAGGACCTGTTATTAACGTGACTAAGCATATTGCTTTCCAAGATTTTAGTTCCAA  
AAATCCCAGATTGAAGCAAGATCTTACACTACTTGGCAGTGCTATCGTCTCAGATGAAAA  
ATCAACAGTTCAAATTCCTGACCCTGAACAGGAAGGTGACCTTAAGCATTAGCAGGACG  
AGCTATTTATGCTTACCTATCCGTTTCTTTGATCCTCTATCTCAAACACCAGCTTCATTT  
GAAACAACCTTCTCATTTCAATTTCAAGTACTGAAGTCCAATTCAGCAACGGGACATCA  
GATCTTGGAAAATATGTTGGTGGTAGTGGCTTTACTTTTATTATTGTCCCTGATGAATTA  
CCCTTGGCCGTTCTGGTCCGTGGCTTGGCATGCTCAACGATCTATGCGACGACGATTAC  
AAATCAGTAGCTATTGAGTTTGATACGCGCCGGAATACTGAATTTGGTGTATCCAAATGAC  
AATCACTTGGGCATCAATTTAGGAAGCATAGTTTCAACTGCAGCAATTAATGCTTCGGAC  
GTTGGAGTCCAACCTCAATGACGGCTCAATTCACAGAGTTTGGATATCATAAATGGGCAG  
AGGCGATTTATCGACATCCGTCTTGACCTGATGGCAGAGGATATCCTTCTAAGTCAGTC  
TACTCTGGTTTTCTTGACCTCTCGCCTTACTTGAATGAGTACATGTTTGTAGGATTTTCA  
CTGCAACTGGTAACCATACGCAAATCCACAATGTCCTGTCTGGAATTTCACTTCAGTTT  
GTCAAGCTTCCCTTAGAATTCCTTCAACAGAGACATGTCAAAATCAAATCATGCTTCAAAA  
TAATACACAAGCTGAAACTACACATCGGAAAACGCCTAATAGTTTCTTTATTTTCTTGT  
GTTGTCACTTCTTAGTAATTGTTCTTATTAATCTCTATTTTAGTAGCTACAAGCGAAATGA  
CAATTCAGTGAACAATCATTCTGCCCAGAGAAAAAGCAAAGACCAAGGCCACCAATAA  
AGCACGTCGCTTACAATAGCCGAAATCTCAGTNCAATCATTCTGCCCGAGAAAAAGCAA  
AGACCAAGGCCACCAATAAAGCACGTCGCTTACAATAGCCGAAATCTCAGTAGCAACT  
AGGAATTTCAAGTGAAGTACAATATTGGGCAGTGACGAGAAGAGCATTACGTATAAGGC  
CACGATGCTGAACGGGTGTAACGTGGTTGTAACGATTTTTAACTCAGTTTTTCAACAC  
TCATGGATTTGACAAGCAAAGATTTACAAGGAAATTAAGGCTATTAGCAGTATTCGCTA  
CCCAAATTTGGTCCCCCTTAGAGGATGGTGCTATGACAACCAAGAACTATAGTTGTTA  
CGATTACATCCCAAACGGTAGCCTAGACAAATGGTTGTTTGGTGTGCGCGTCTTACCTTG  
GACGAGGCGTTTTAAGGTTGTTAAAGATTTAGCGGACTCTTGTCTACCTTCACTCAA  
GCAACTTGCTCACAAGAACGTGAAAAGTAGTAGTGTGTTTCTTGACGTGAGCTTCAGAGC  
AGTAGTGGGTGATTTTGGATTTGTGCTTACTTCAGCTGGGTCAACTCGGTTTGTGATCCAT  
GGTGAGTCAAACAGCAGACGTGTTTCGAGTTTGGAGTTGTTGTCTAGAACTGTTGCGG  
GTCGGAGCAGGAAGTCTAACCCGGGAGAACGTGACTTGTGGATCTTGCATGGGCCAT  
GCATGAGGTACAACAGAAGGAAACGTTAGTGGATCGAAGAATGGGCGCGGTTGTGAAC  
CTGGAGCAGGCGATTCCGGTATTGGATATCGGGTTGCTATGTACGTTGAACGAGAACAA  
AGGAAGGCCTACAATGGAAGAAGTGGTGGAGTTCCTGAATATGGAGAATCCAATTCCTG  
AGTTGCCATCGGGTCGACCCGTTTGTGTTCCCCTACAACAGCACACAGGTTTGTGC  
AGTGGGTACGCCTGCACTGCATTCAAATGA

---

*S. lycopersicum* LecRK sequences

>Solyc09g012000.1.1 GenBank ID: KT232153

MLPMLLNFLVLSLLFAPTSGEVDGFIYNGFKPSDVSLDGIANITPNGLLLLTDSKTQDQGHAF  
YPNPIHFKNSPYGDASFSTTFVFAIRSDYRPLDGHGLVFVIAPQRRGIRKALANHYLGLFNSTR  
NNGDKSNHVVGVEFDTIYSADFGDMNDNHVGDINGLRSVANHTAGYFDDHTGLFNFTLVS  
GMAMQVWVDYDGITKLINVTVAPLHMEKPVTPLLSLKYDLSPILNQIMYVGFSSSTGSVPTHH  
YILGWSFKANGKAQELSQLPSLPRLLGRKGASRFVTIGLPVISLVTIVVATLVVVCYVRRKKYEE  
VLEDWEREYRQRFNYKDLYTATKGFREKELLGAGGFGKVYKGVMPVTKHEIAVKKISHES  
RQGMKEFVSEIVSIGRMQHRNVVPLLGYCRRKGELLVYEFMSNGSLDKYLYDQPRLLTDW  
NQRFRVIQGVASGLFFLHEECDRVVHRDIKASNVLLDGELNGRLGDFGLARLYGHGTDQPQ  
STRVVGTLGYLAPEHTRTGRATPSSDVFSGAFLLEVACGRRPIEPRHDGDDLILVDWVWSC  
WNRGNILEAVDPNLGNDVFGQVELVLSLGLFCSHSEPSFRPTMRQNVLFLEGGVVALPELSA  
LGVSADLTFDHRGGFDDFIKSYPASSVNAHSPASSVAESLLSDGR

>Solyc09g012000.1.1 GenBank ID: KT232153

ATGTTACCAATGTTGTTAAATTTTGTCACTAGTGTCTCTCTTGTGGTGGCACTTCTG  
GTGAAGTTGATGGATTCATTTACAATGGATTCAAACCAAGTGATGTTAGTTTAGATGGCAT  
TGCTAATATTACCCCAATGGTCTTTTGTGTTAACAGATTCCAAAACACAAGATCAAGGC  
CATGCTTTTTATCCAAATCCAATTCATTTCAAGAATTCACCTTATGGTGTATGCATTTTCATT  
CTCTACAACCTTTGTGTTCCGCGATAAGGTCTGATTATAGACCATTGGATGGTGCATGGACT  
AGTTTTTGTATCGCGCCACAGAGAGGAATTCGAAAGGCTTTGGCAAACCACTATCTTGG  
TCTTTTTAACTCAAGAAATAATGGGGATAAATCAAACCATGTTGTTGGAGTTGAGTTTGT  
ACAATATATAGCGCGGATTTTGGTGTATGAATGACAATCATGTTGGAATTGATATAAATG  
GATTAAGGTCTGTAGCAAATCACACAGCAGGTTATTTTGTATGATCATACTGTTTTGTTTAA  
TAACTTTACTCTGGTTAGTGGTATGGCAATGCAAGTTTGGGTGGATTATGATGGTATAAC  
TAAGCTAATCAATGTGACAGTAGCTCCATTACATATGGAAAACCAAGTTACTCCACTTTTG  
TCTTTGAAATATGATCTTTCCGCGATTCTTAATCAGATTATGTATGTTGGTTTTTCATCATC  
AACTGGTTCAGTCCCAACACATCATTATATCTTAGGATGGAGCTTTAAGGCAAATGGGAA  
AGCTCAAGAACTTTCTCAACTTCTAGTCTTCTCGTCTTGGGCGTAAAGGGGCATCAAG  
ATTTGTAACGATTGGGTTACCAGTGTCTCTTTGGTTACAATTGTTGTAGCAACCTTGGTG  
GTGGTTTGTATGTTAGAAGGAAGAAGTATGAAGAAGTTCTTGAAGATTGGGAACGTGAG  
TATAGACCGCAAAGGTTCAATTATAAGGATTTGTACACTGCTACTAAAGGGTTCAGAGAA  
AAGGAGCTGTTGGGAGCTGGTGGATTTGGTAAAGTTTATAAAGGAGTGTATGCCTGTAAC  
CAAACATGAGATAGCTGTAAGAAGATATCTCATGAATCAAGACAAGGGATGAAGGAATT  
TGTTTTCGGAGATTGTAAGTATAGGCCGATGCAACATAGGAATGTAGTACCCTTTTGGG  
CTATTGTAGCGCAAAGGGGAATTACTTTTGGTTTATGAGTTTATGAGTTTATGAGTTTATG  
AGATAAGTATTTATACGACCAACCAAGACTCACCTCGATTGGAACCAAGATTACAGAGT  
CATTCAAGGTGTAGCATCAGGACTATTTTTCTACATGAAGAATGTGACCGTGTAGTGGT  
TCATAGGGATATTAAGGCTAGTAATGTGTTGTTGGATGGTGAACCTAAATGGCAGGCTAGG  
AGACTTTGGACTCGCGAGGCTATATGGTCATGGGACTGATCCTCAATCAACTCGTGTGCG  
TTGGTACTCTTGGTTATCTTGCACCAGAGCATACTAGAAGTGGCAGGGCAACACCTAGTA  
GTGATGATTTTTCTTTGGGGCTTTTCTGCTTGAAGTTGCGTGTGGTAGGAGGCCGATAG  
AGCCAAGACATGACGGTGTATGATCTGATTTTAGTTGATTGGGTGTTTTCTGCTGGAATA  
GAGGTAATATTCTCGAGGCTGTTGATCCAACTTAGGCAATGATTTTGTCCAGGGCAAG  
TTGAGTTGGTCTTAAGTCTAGGCTTGTCTGTTCTCATTGAGAGCCCTCATTAGGCCAA  
CCATGCGACAAAACGTGTTGTTCTTGAAGGTGTGGTGGCCTTACCAGAGTTATCAGCT  
CTCGGTGTTTCATATGCTGACCTAACATTTGACCATCGCGGAGGTTTTGATGATTTTATCA  
AGTCGTATCCAGCTTCTTCTGTTAATGCACATTCCCCCGCTTCATCTGTAGCAGAATCGC  
TCCTTTCTGATGGCCGATGA

>Solyc09g011990.1.1 GenBank ID: KT232154

MLFNLVILVLSLFLVGIAPVSCVDHAFIYNGFQSQNLSDGIAEFTPDGLLLLTDSETQDQGHA  
FYPNPIHFKNSTNGTVVSFSTTFVFAIRSDYGLSGHGLVFVIAPQRRRIQGALAYHYLGLFNST  
NNGDRSNRVVGVELDTIYSEFGDINANHVGDINGLRSVAVETAGYFDNTGLFHNLTLISGQ  
PMQVWVDYDGSTKQINVTVAPLHVEKPVSPLLSLKTDLSPILDQTMVYVGFSSSTGSVPYHYI  
LGWSFKTNGKAQELSQLPNLPRLLGRKGTSRFVKIGLPLLSLVLLVATSMVYVYVRRKKYEE  
LLEDWEREYRQRFMYKDLYTATKGFREKELLGAGGFGKVYKGVMPITNLEIAVKKISHESR  
QGMKEFVSEIVIIGRLQHRNVVPLLGYCRRKGELLVYEMYSGGSLDKYLYNKPRFTLDWSQ  
RFRVIRGVASGLFFLHEECDHVVHRDIKASNVLLDGELNGRLGDFGLARLYSHGTDQPQSTR



VVGTGLYLAPEHTRTGRSTPSSDVF SFGAFLLEVACGRRPIEPRQDDDDLILVDWVWFSCWN  
RGNILEAVDLNVGIDFVPGEVEMVLKLGLLCSHKSYPRTMRQVLLFLDGVVALPELSSLGI  
SAAGLTFDHHGGFDDFVTSYSSSINAHSRSPSVTDSFSLGGR

>Solyc09g011990.1.1 GenBank ID: KT232154

ATGTTGTTCAATCTTGTCACTAGTTTCTCTTTTCTTAGTTGGTATTGCACCAGTTTCTTG  
TGAAGTTGATCATGCATTCATTTACAATGGATTCCAATCACAAAATCTTAGCTTGGATGGT  
ATAGCAGAGTTTACGCCCGATGGTCTTTTGTCTGTTAACAGATTCTGAAACTCAAGATCAG  
GGCCATGCTTTCTATCCGAATCCAATTCATTTCAAGAATTCAACTAATGGTACTGTAGTTT  
CATTCTCTACAACATTTGTGTTCCGCATAAGGTCTGATTATGGAATTTTGTAGTGGTTCATGG  
ACTGGTTTTTGTATCGCGCCACAGAGAAGAATTCAAGGAGCTTTAGCATACCACTATCT  
AGGACTTTTTAACTCAACTAATAATGGGGATAGATCAAACCGTGTAGTTGGAGTTGAGCT  
CGATACAATCTATAGCGAGGAATTTGGTGATATCAATGCCAATCATGTTGGAATTGATATA  
AATGGATTAAGGTCTGTAGCAGTTGAAACAGCAGGTTATTTTGTATAACTGGCTTGTTC  
ATAATTTGACTTTGATAAGTGGCCAGCCTATGCAAGTTTGGGTGGATTATGATGGCAGTA  
CTAAGCAAATTAATGTAACAGTAGCTCCATTACATGTGGA AAAACCAGTTAGTCCACTTTT  
GTCTTTGAAAACACTGATCTTTCGCCGATTCTTGATCAGACCATGTATGTTGGTTTTTTCATCA  
TCAACTGGTTCTGTCCCAACATATCATTATATCTTGGGATGGAGCTTCAAGACAAATGGG  
AAGGCTCAAGAACTTTCTCAACTTCCTAATCTTCTCGTCTTGGACGCAAAGGGACATCA  
AGATTTGTAAAGATTGGTTTGCCATTACTCTCTTTGGTTTTACTTGTGTAGCAACCTCGA  
TGGTGGTTTACTATGTTAGAAGGAAGAAGTATGAAGA ACTTCTTGAAGATTGGGAACGCG  
AGTACAGACCACAAAGTTTTATGTACAAAGATTTATACACTGCCACTAAAGGATTCAGAG  
AAAAGGAGCTGTTGGGAGCTGGTGGATTTGGTAAAGTTTACAAAGGAGTAATGCCTATC  
ACCAATCTTGAGATAGCTGTAAAGAAGATATCTCATGAATCAAGACAAGGGATGAAGGAA  
TTTTGTTTCGGAGATTGTGATCATAGGTCGTCTACAACACAGGAATGTAGTACCACTTTTG  
GGTTATTGCAGGCGGAAAGGAGAGTTGCTTTTGGTTTTATGAATACATGTCTGGTGGAAAGT  
CTAGACAAATATTTATACAACAAACCAAGATTCACCCTTGATTGGAGCCAAAGATTTCAGA  
GTTATTAGAGGTGTAGCATCAGGACTATTTTTCTACACGAAGAATGTGACCATGTAGTG  
GTTCATAGGGACATTAAGGCTAGCAATGTCTTGTGGATGGTGA ACTAAATGGTAGGCTA  
GGAGACTTTGGACTTGCAGGCTATATAGTCATGGTACCGATCCTCAGTCTACTCGTGT  
CGTTGGTACACTTGGTTACCTTGCACCAGAGCATACTAGA ACTGGCAGGTCAACACCTA  
GTAGTGATGATTTTTCTTTGGTGCTTTTCTGCTTGAAGTTGCCTGTGGTAGGAGGCCTA  
TAGAGCCAAGACAAGACGATGATGATCTGATTTTAGTCGATTGGGTTTTCTCATGCTGGA  
ATAGGGGTAATATTCTTGAGGCTGTTGATCTAAACGTAGGGATCGATTTTGTCCAGGGG  
AAGTGGAGATGGTCTTAAAGCTAGGCTTGTCTGCTCTCATTCAAAGCCCTCGTATAGGC  
CAACCATGCGACAAGTCTTGTGTTCTTAGATGGTGTGTTGTGGCCTTACCAGAGTTATCAT  
CACTCGGTATTTTACAGCAGCCGGCCTAACATTTGATCATCACGGAGGTTTTGATGATTTTG  
TCACGTCTATTCTTCGATTAATGCACATTCCCGTTCTCCATCTGTAACAGACTCCTT  
TCTCTCTGGTGGGCGATGA

---

>Solyc09g011060.2.1 GenBank ID: KT232155

MFFNFLFILVALFLLDFSPASCEVDAFIFNGFQSANLSLDGIAQFKSNDLLLLNSGTQNQGHAF  
YPNPIHFKNSSNGTVFSFSTTFVFAIRSDYGNLSGHGLAFVIAPHKGLQGSLANHYLGLFNSS  
NNGNTSNHVVGVELDTIYSEDFGDINDNHVGDINGLRSVAIHTAGYFDDTDLFHNLTLISGQE  
MQWIDYDGRTKQMDVTVAQSHMEKPVRPLLALKYDLSSILDQTMVYVGFSSSTGSVPHTHY  
ILGWSFKTNGKAQELSQLPKLPRLGTKGTSRFVTIGLPIISLVSLVA AVLAVVYVVRKKKYEEIH  
EDWEREYRLQRFKYKELYIATKGFREKELLGAGGFGKVYKGVMPPTTKLEIAVKKISHESRQG  
MKEFVSEIVSIGRMQHRNVVPLLYCRRKGELILY EYMSNGSLDKYLYDQPRYTLDWNQRF  
RVIRGVASGLFFLHEECDHVVVHRDVKASNVLLDGELNGRLGDFGLARLYGHGTDQPQSTRV  
VGTGLYLAPEHTRTGRATPSSDVF SFGAFLLEVVCGRPIQPRQDGD LILVDWVWFSCWNR  
GNILDAADPNIGIDFVPGQVELVLKLGFLC SHSEPSRPTMRQILLFLDGVVALPELSELGVSS  
ANLTFEHRGGFDDFVKSYPSSLGYAYSGSPSVTDSFSLGGNVGDHIALLKVYNSWKETNFS  
TQWCYDNYIQVRSMKRARDIRDQLEGLLERVEIKLTSNVNDLEAIKKCITSGFFPHARLQKA  
GSYRTVKHPQTVNIHPSSGLSQELPRWVVYHEQVLT SKEYMQQVTELKPEWLVEIAPHYYQ  
LKDVEDSSSKKMPRGIGHAP

>Solyc09g011060.2.1 GenBank ID: KT232155

ATGTTCTTCAATCTTTTCATACTAGTAGCTCTCTTCTTACTTGATTTTTACCTGCTTCTTG  
TGAAGTTGATGCATTCATTTTCAATGGATTTCAATCAGCTAATCTTAGCTTGGATGGCATA  
GCACAGTTCAAATCTAATGATCTTTTGTGTTAACAAATTCTGGAACACAAAATCAGGGCC

ATGCTTTTTATCCAAATCCAATTCATTTCAAGAATTCATCAAATGGTACTGTATTTTCTTTCTTC  
TCCACAACCTTTTGTGTTTCGCGATAAGGTCTGATTATGGAAATTTGAGTGGTCATGGACTA  
GCTTTCGTCATCGCGCCACACAAAGGACTTCAGGGGTCTTTGGCAAATCACTATCTTGGT  
CTTTTAACTCTAGTAATAATGGGAATACATCAAACCATGTCGTTGGAGTTGAGCTCGATA  
CAATCTATAGCGAGGATTTTGGTGATATCAATGACAATCATGTTGGAATTGATATAAATGG  
ATTGAGGTCTGTAGCAATTCACACAGCAGGTTATTTTGTGATACTGATTTGTTTCATAAC  
TTGACTTTAATTAGTGGCCAGGAAATGCAAGTTTGGATCGATTACGATGGGAGGACTAAG  
CAAATGGATGTAACAGTAGCTCAATCACATATGGAAAACCAGTTAGACCACTCTTGGCT  
TTGAAATATGATCTTTCGTCGATTCTTGATCAGACTATGTATGTTGGTTTTTCATCGTCAA  
CAGGTTCACTCCCAACGCATCATTATATCTTGGGATGGAGCTTCAAGACAAATGGGAAA  
GCGCAAGAAGCTCTCGCAACTTCCTAAGCTTCTCGTCTTGGGACTAAAGGGACATCAAG  
ATTTGTAACGATTGGTTTGCCTATAATCTCATTGGTTTCACTTGTTCAGCTGTCTTAGCG  
GTGTTTTATTATGTAAGAAAGAAGAAGTATGAAGAAATTCATGAAGATTGGGAACGCGAG  
TATAGACTACAAAGGTTTAAAGTATAAAGAATTGTACATTGCTACTAAGGGATTCAGAGAAA  
AAGAGCTATTGGGAGCTGGAGGATTTGGTAAAGTTTATAAAGGAGTGATGCCTACCACC  
AACTTGAGATAGCTGTAAAGAAGATATCTCATGAATCGAGACAAGGGATGAAGGAATTT  
GTTTCGGAGATTGTAAGCATTGGTTCGATGCAACACAGGAATGTAGTACCCTTTTGGGT  
TATTGCAGGCGAAAAGGGGAGTTGATTTTATTACGAATACATGTCAAATGGAAGTCTA  
GACAAGTATTTATACGATCAGCCAAGATACACCCTCGATTGGAACCAAAGATTCAGAGTC  
ATTAGAGGTGTAGCTTCGGGACTATTTTCTACACGAAGAATGTGATCACGTAGTGGTT  
CATAGAGATGTTAAGGCCAGTAATGTCTTGTAGATGGTGAACATAATGGCAGGTTAGGA  
GATTTTGGACTCGCTAGGCTGTATGGTCATGGGACCGATCCTCAGTCCACACGGGTTGT  
TGGTACTCTTGGTTACCTTGCACCAGAGCATACTAGAAGTGGCAGGGCAACACCTAGTA  
GTGATGTTTTTTCATTTGGGGCATTCTGCTTGAAGTTGTCTGTGGTAGGAGGCCGATAC  
AGCCAAGACAAGACGGTGATGATCTGATTTTGGTTCGATTGGGTGTTCTCGTGTGGAAATA  
GGGGTAATATTCTTGATGCTGCTGATCCGAACATAGGCATTGATTTTGTCCAGGGCAAG  
TGGAGTTGGTCTTAAAGTTAGGCTTGTCTGTTCTCATTGAGAGCCCTCGTGTAGGCCAA  
CCATGCGACAAATCTTGTGTTTTTGGATGGTGTGGCCTTACCAGAGTTATCAGAAC  
TCGGTGTTCATCAGCTAACCTAACATTTGAACATCGCGGAGGTTTTGATGATTTGTCAA  
GTCGATCCATCTTCTTTGGGCTATGCATATCCGGTCTCCATCTGTAACAGACTCCTTT  
CTCTCTGGTGGCCGGTGATTAATAATGATTGAACCTGGTAAACATAATCTTGTTTTGGT  
GGATTATGTAAGTATAAATTAGATTTAATCTACACATTATAGAACAGTTTCATAACATTTAA  
ATGATTCAGGCTTTGATAGTACAGTTTACAATGGAACAATACACAGAGTTAAGTATTCC  
TGACTTATTTTTCTTTCATTTGTTATGTTTTACCTATCTAATCAATAACCGTTTATGACTG  
ATCACTCGCCATTAACCTCGGTTTTGTGTATAATCATTATATAGAAGAGATGGCCGAGT  
GATTTAAGGCGTAGCATTGGTTAATAGGAATCAAGTTATTCATTGGAATCAATTCATTGTG  
ATGAAGGCTCTATATTTGCCTTCTCAGATGTTGAATGTTAATGAGTTTATGATGATTTTAT  
ATGTTGACAATGACAAACTGCAAACCACAAAGCACTTTTACTGTTATCAGCTAGTTTTTC  
TATCTCATTCCGATGGGGGATTTGCCTAAGCTATCTTACATATCCCTCTTCTCAGAAGCT  
TGTCAGTCTACTAGTCCCTACTTTTTTACTAGCCAAGTACGTTGAAATTTCTTTTGTATGG  
GTGGCAGTGTGATTAGGTCTCAGGACCTCTGTCTGCTCTGATATCATGTTGAAGTGTATG  
ACAATCTTAATTATCTAAAAGTTTAAAGTTGTTAGAGAGAACACATTTTTATTAATTAATTGT  
ATTCTCAGCTGACATCGCCCTAACCCACAGTGTCTGTTATATACATCCACACACATGAAGTG  
CACCTATATGCAAATTTCTACTGTTAATTAGAGGTTTTAATGATTCATTGTAATTCATTT  
TGCAAGAGGACCCTGAAAAGAAGTGCCAAAAATATCAAATTTAGATGCCAAAGCTTAGTA  
ATATTTTGTGAAATTTGCTGTGAAGGGAATATTTTGGTAGGAAAATTTTGGTGGTATAGA  
ACCCGCTACATTGAATTTTACTTTCATGGACCCTCCACCATCAGAAGCTTTACTTAAAGC  
ACTCGAAGTCTCTTTGCCCTCGGTGCCCTTAATAAGCTTGGAGAGTTAACAACAATAGG  
TAGAAGAATGGCAGAGTTTCTCTAGATCCCATGCTGTCCAAGACGATCGTTGCCTCTGA  
CAAATACAAGTGTCTGATGAAATTATAAGTATTGCTGCAATGCTTTCTGTGGGGAATTC  
ATCTTTTATCGTCCAAAGGACAAACAAGTCCACGCTGACAATGCACGTTTGAATTTTCATA  
CAGGCAACGTTGGAGATCATATCGCACTGTTAAAGGTTTATAATTCCTGGAAGGAGACAA  
ACTTCTCAACACAGTGGTGTACGACAATTACATCCAGGTCCGAAGCATGAAGAGAGCT  
AGGGATATCCGAGATCAATTGGAAGGCCTGCTGGAGAGAGTAGAAATTAAGTTAACTTC  
AAATGTTAATGACTTAGAAGCTATAAAGAAGTGTATAACATCAGGATTTTTCCACACACG  
GCGAGACTACAAAAGGCTGGATCTTATCGAACTGTTAAACATCCTCAAACAGTTAACATT  
CACCCAGCTCAGGTTTATCTCAGGAGCTTCTAGATGGGTTGTGTACCATGAGCAGGT  
CTTGACGAGTAAGGAGTATATGCAACAGGTTACTGAACTGAAACCAGAATGGCTTGTAGA  
AATAGCTCCTCACTACTATCAGTTGAAAGATGTTGAAGACTCTAGCTCAAAGAAAATGCC  
TCGCGGAATTGGACATGCACCTTAG

---

>Solyc09g005000.1.1 GenBank ID: KT232156  
MDNPYCLVILALIFCPILVRAQSFDFAYNGFNNSNIIRDGVAIINSSGALKLTNRSYNVIGHAFH  
PNPVPINFSSTKNVTFSSTYFVFAIVPLEKTSGGFGFAFTLSPSPGFPGAQGDHFLGVVNIMN  
DGNDTNHIFMVEFDTVNGHNEGVDTDGNHIGVNRNGMSPTASKSADYYVNDSSAVAEQVNL  
QSGESIQAVIDYDGMASKVVNVTISPITVPKPGRPLISEVVDLSTVLNETMYAGFSAATGDKAS  
SHYILGWSFRLNGAADPLELVKLPVAPPEVVTSSKNSHLKRALIGTFCSVILLGAFYIYTRM  
RQHEVLEDWELDCPHRFYRHLKATKGFQESELIGVGGFGAVYKGVLPNTNGAEVAVKKIS  
SNSLQGMREFAAEIESLGRRLRHKHLINLQGWCKNKNDLLLVDYVVPNGSLDSSLYRQKRDIV  
LTWEQRFNIIKGAAGLLYLHEEWEQVVIHRDVKSSNVLIDGEMNGRLGDFGLARLYDHGKN  
SHTTNVVGITIGYIAPELTRTGKASTSTDVYAYGVLLLEVASGRPPIVYEPGKGLVLADWVIEC  
LQLGNILDAVDQRLNSVYVDKEVQMIFRLGLVCSHPRPEARPTMRQVMKYLNQDESPLVFE  
QQLSCIGSDRVEITAKFLEVFSTDTINISRRSLSVGQISSSSLSHSGR

>Solyc09g005000.1.1 GenBank ID: KT232156  
ATGGACAATCCCTATTGCCTAGTTATTATTCTTGCAATTGATCTTTTGCCTATTCTTGTGA  
GAGCTCAATCTTTTGATTTTGCTTACAATGGATTCAATAACTCAAATATCATTAGAGACGG  
AGTAGCAATAATCAATTCAAGTGGTGCACCTAAGCTCACTAATAGATCATATAATGTTATA  
GGTCATGCTTTCCACCCCAATCCTGTACCAATTTTCAACTCCAGTACTAAAAATGTTACTT  
CATTTAGTACATACTTCGTCTTCGCCATCGTCCCTCTTGAGAAAACCTCTGGTGGCTTTG  
GCTTTGCTTTACCTTATCTCCATCCCCGGGTTTTCCGGGTGCTCAGGGTGATCATTTTC  
TTGGAGTCGTCAACATTATGAACGATGGCAATGATACTAACCACATCTTCATGGTTGAAT  
TTGACACTGTGAATGGTCACAATGAAGGTGTAGACACAGATGGAAATCACATTGGGGTC  
AACAGAAATGGCATGAGCCCTACAGCGTCAAATCAGCTGACTACTATGTTAATGATTCT  
GCTGTAGCGGAGCAGGTAATCTACAAAGTGGAGAATCAATCAAGCTTGATTGATTAT  
GATGGAATGAGCAAAGTGGTGAATGTAATATCTCCATAACAGTTCAAAGCCAGGT  
AGGCCTCTGATCAGTGAGTTCGTAGATTTTACTGTGTTGAACGAAACTATGTATGCT  
GGTTTCTCAGCAGCCACGGGAGACAAAGCGAGCTCTCATTACATCTTGGGTTGGAGTTT  
TCGGTTGAATGGAGCTGCTGATCCTTTAGAGCTTGTAAGCTACCTGTTGCCCCACCTGA  
AGTGGTAACATCATCCAAGAATCCCATCTCAAAGGGCCTTGATCGGAACATTTTGCTC  
CGTCGTTATCCTGCTCCTTGGGGCATTTTACATCTATAACAAGGATGAGGCAACATGAAGT  
TCTAGAGGACTGGGAGCTGGATTGTCCTCACAGGTTCCGATATAGACATCTTACAAGG  
CAACTAAGGGATTCCAGGAGAGTGAATAATTGGAGTTGGTGGATTTGGTGTGTTTACA  
AGGGTGTTTTGCCTACTAATGGAGCAGAAGTTCAGTGAAGAAGATATCGAGCAATTCTC  
TTCAAGGAATGAGAGAATTTGCAGCGGAGATCGAAAGCTTAGGCAGGTTAAGGCACAAA  
CACTTGATCAACCTTCAAGGCTGGTGCAGAACAATAATGATCTTCTCCTAGTGTATGAC  
TATGTCCTCAAAATGGAAGTCTTGATTACTTTACAGACAGAAGAGGGACATTGTTTTAA  
CATGGGAACAGAGATTTAACATCATCAAAGGGATTGCTGCAGGGCTTCTTTACTTGCATG  
AAGAATGGGAACAAGTGGTAATACATCGCGATGTGAAAAGCAGTAACGTCCTTATTGATG  
GGGAATGAATGGCCGGTTAGGGGATTTTGGGTTAGCAAGATTATACGACCATGGCAAG  
AATTCACACACAACAATGTTGTTGGCACAATAGGGTACATTGCACCAGAATTGACACGG  
ACAGGGAAGGCCTCAACGAGCACGGATGTGTATGCATATGGTGTACTACTTCTTGAAGT  
AGCTAGTGGAAAGACCTCCTATTGTCTATGAACCAGGGAAAGGAGCTTTAGTACTAGCTG  
ATTGGGTGATTGAATGTTTACAACACTAGGTAATATTCTTGATGCAGTTGATCAAAGGTTGAA  
TTCAGTGTATGTAGATAAAGAGGTTCAAATGATTTTCAGACTTGGGCTTGTGTTCTCAC  
CCAAGGCCAGAAGCTAGGCCAACAATGAGACAAGTAATGAAGTACCTCAATGGAGATGA  
ATCACTTCCAGTTTTTGGAGCAACAGTTGAGTTGTATTGGATCTGATAGGGTTGATGAAAT  
CACAGCCAAGTTCTTGAAGTGTGTTTCTACTGATACAATCAATATATCACGTCGTTTCGCTA  
TCCGTCGGACAGATATCATCTAGTTCCTCATTCTGGTTCGATGA

---

>Solyc02g078170.1.1  
MNQFYPKILLSYLLALFSCNQSVAEEDFVFNQKQSDVSIFGNVTIESRILTLSDSTFSIGRA  
LYPSKIVTKEANSSKVLFPSTSFIFAMAPYRDRLPGHGIVFLVPHTGIDGTTSAQNLGFLNFT  
NNGNPDNHVFGVEFDVFNQEFNDINENHVGIDVNSLASEFAHEAGYWPDEKIKYNSDGLS  
NEESLETLLKLNNGRNYQVWIDYVDFNISVTMAPVGMKRPKQPLLDLHNLNSQVFEEMYVG  
FTAATGELAQSHKILAWSFNSNSFSIGDGLITQGLPSFELPEDPVYRSKGFAGMTVSLFLV  
VIASWFLIKRNRMRKREDMEDWELEYWPHRITYQEIDAATKGFADENVIGIGNGKVY  
KGVLAGGSEVAVKRISHQNSEGARQFLAEISSLGRKQRNLVSLRGWCKKDRGSMFVYDY  
MENGSLDKRLFESNDRNMLSFEDRIRILKDVASGVLYLHEGWKAVLHRDIKASNVLDRDM  
NARLGDFFGLARMHDHSQVASTTRVVGTVGYLAPEFAKTGRASTQTDVFGYGVLMIVMCG

RRPIEEEKPLVDWLWELMSRGLINAFDSRLRTNQDFNEEEALRVLQLGMICASLDAKAR  
PSMRQVVKFFDRNNDIDEYETEDMDAYLLESLSRNTMLSNFSLSLSHGSHPTFDEIREGASF  
D

>Solyc02g078170.1.1 Corrected; GenBank ID: KT232157  
MNQFYPKILLSYLLALFSCNQSVAEEDFVFNQKQSDVSIFGNVTIESRILTLSDSTFSIGRA  
LYPSKIVTKEANSSKVLFPSTSFIFAMAPYRDRLPGHGIVFLVPHTGIDGTTSAQNLGFLNFT  
NNGNPDNHVFGVEFDVFNQEFNDINENHVGIDVNSLASEFAHEAGYWPDEKIKYNSDGS  
NEESLETKLNNGRNYQVWIDYVDFNISVTMAPVGMKRPKQPLDFHLNLSQVFEEMVYV  
FTAATGELAQSHKILAWSFSNSNFSIGDGLITQGLPSFELPEDPVYRSKGFAGMTVSLFLV  
VIASWFLIKRNRMRKREDMEDWELEYWPHRITYQEIDAATKGFADENVIGIGGNGKVY  
KGVLAGGSEVAVKRISHQNSEGARQFLAEISSLGRKQRNLVSLRGWCKKDRGSMFVYDY  
MENGSLDKRLFESNDRNMLSFEDRIRILKDVASGVLYLHEGWKVLHRDIKASNVLDRDM  
NARLGDGFLARMHDHSQVASTTRVVGTVGYLAPEFAKTGRASTQTDVFGYVGLIMEVMCG  
RRPIEEEKPLVDWLWELMSRGLINAFDSRLRTNQDFNEEEALRVLQLGMICASLDAKAR  
PSMRQVVKFFDRNNDIDEYETEDMDAYLLESLSRNTMLSNFSLSLSHGSHPTFDEIREGLSS  
SMSISWTNSLVDGR

>Solyc02g078170.1.1 Corrected; GenBank ID: KT232157  
ATGAACCAATTTTATCCAAAATTCTTCTTTCTTATCTGTTATTAGCCCTATTTTCTTGTA  
CCAATCAGTTGCAGAACTGATTTTGTCTTCAATGGCTTCAAACAATCAGATGTGTCAATA  
TTTGGGAATGTTACAATTGAATCAAGAATTCTTACTCTTCAAATGACTCAACTTTTTCAAT  
TGGTAGAGCTCTGTACCCTTCAAAGATTGTTACAAAAGAAGCTAATTCATCTAAAGTTCTT  
CCTTTTCAACATCTTTCATTTTTGCAATGGCTCCTTACAGAGACAGGCTACCGGGACAT  
GGTATAGTTTTCTGTTTGTCCACACACAGGTATTGATGGTACTACTTCTGCACAGAATT  
TAGTTTTCTTGAATTTTACAAATAATGGGAATCCTGATAATCATGTGTTTGGGGTTGAGTT  
TGATGTTTTCAAGAATCAAGAGTTTAAATGATATAAATGAGAATCATGTTGGAATTGATGTT  
AATTCTCTTGCATCTGAGTTTGTCTCATGAAGCAGGATATTGGCCTGATGAGAAAATTAAG  
TATAATAGTGATGGTAGCCTAAATGAGGAGTCTTTAGAGACTTTGAAGTTGAACAATGGA  
AGAAATTATCAAGTTTGGATTGATTATGTTGATTTCAACATTAGTGTAAGTATGGCACCAG  
TTGGTATGAAAAGGCCTAAGCAGCCTTTGTTGGATTTTACCTAAATCTTTCCAGGTTTT  
TGAGGAAGAGATGTATGTGGGGTTTACAGCAGCCACTGGAGAGCTTGTCAAAGTCACA  
AGATTTTAGCTTGGAGCTTTAGTAACTCGAATTTTTCGATAGGTGATGGTTTGTACACACA  
AGGGCTGCCTTCATTTGAGCTTCTGAGGATCCAGTTTATCGATCGAAGGGATTCAATTGC  
AGGTATGACAGTGTCACTCTTGTCTTGTGTTGTGGTCATTGCTGTAGCTTCATGGTTTTG  
ATTAAGAGAAACAGGAGAATGAAAAAGGAAAGAGAGGATATGGAAGATTGGGAATTTGGA  
ATATTGGCCACATAGGATTACTTATCAAGAAATTGATGCTGCAACAAAGGGTTTTGCTGA  
TGAATATGTGATTGGAATTGGAGTAATGGGAAGGTTTATAAAGGGGTTTTGGCTGGGG  
GTTCCGAGGTTGCAGTAAAGCGCATTCTCACCAAACAGTGAAGGAGCAAGGCAATTC  
TTGGCTGAGATTTGAGTCTTGGTAGGCTAAAGCAAAGAAATTTGGTGTCTTAAGAGGG  
TGGTGAAGAAAGATAGAGGCAGTATGTTTGTGGTTTATGATTATATGGAATGGGAGC  
TTGGATAAAAGACTGTTTGAATCTAATGACAGAAACATGCTTAGTTTTGAAGACAGAATTA  
GGATTTTGAAGACGTGGCATCAGGGGTGCTATACTTGCACGAGGGATGGGAGGCAAA  
AGTGTGACAGGGACATTAAGGCTAGCAATGTTTTACTTGCACAGGGACATGAATGCAA  
GGCTAGGTGATTTTGGTCTAGCTAGAATGCATGATCATAGTCAAGTGGCTAGCACGACT  
CGAGTTGTTGGCACGGTGGGATACTTGGCACCAGAGTTTGCCAAGACTGGCCGTGCCT  
CCACACAAACCGATGTGTTTGGATATGGAGTACTAATTATGGAGGTGATGTGTGGAAGG  
AGGCCTATAGAGGAGGAAGGCAAGCCGCTTTAGTGGATTGGCTGTGGGAATAATGA  
GCCGAGGCGAATTGATTAACGCCTTTGATAGTCGATTAAGGACTAACCAAGATTTCAATG  
AAGAGGAAGCTTTAAGGGTGTGCAATTAGGCATGATATGCGGAGCCTAGACGCCAAA  
GCTAGGCCAAGCATGAGACAAGTGGTGAATTTCTTTGACAGGAATAATGATATTGATGAA  
TATGAAACGGAGGACATGGATGCTTACCTTCTAGAGAGTTTGGAGATCTAATACCATGTTG  
TCCAATTTTTCGTTGAGTTAAGCCATGGTTACATCCAACATTTGATGAAATTAGAGAAG  
GTTTGTCTTCTTCATGTCAATTTCTTGGACAAATCACTGGTGGATGGTAGATGA

---

>Solyc10g084250.1.1 GenBank ID: KT232158  
MTSNLEKKIRDFLWVIFLLCFCSISSTFGKTDFFENLTLSSLKLLGDAHLSNNIVKLTRDLAV  
PNSGAGKVLVSKPVRFPQPGDFPASFFSTFFSVTNLNPSSIGGLAFVLTPGDELVDGAG  
GYMGILDAKGTQIGTIAVEFDLMDVEFKDINGNHVGLDLNSMISTEVGNLDSIDIDLKSGDLV  
NCWIDYSGSNGEMDIFVSYTNLKPESFLSVNINLAEYVNDFMFVGFSASTQGSTIEHNIVW

WSFSSSFDATPNSGAVVAEPPPPANSLMNPTADSVPLPPPSMAPSESNSSKGVLEKSSRK  
CHSNFCRQPGAVVGVVTAGAFFLAFATLVLWLYSKRFKRVKNSEIVASDIKMPKEFSYKE  
LKLATKGFIPTRIIIRGAFGTVYKILSDTGGIVAVKRCSHNGQGKAFFLSELSIIGTLRHRNLV  
RLQGWCHEKGEILLVYDLMPNGSLDKVLFESRMVLSWSHRRKILIGVASALAYLHQECENQV  
IHRDIKSSNIMLDEGFNARLGFDFLARQVEHDKSPDATVAAGTMGYLAPEYLLTGRATEKTD  
VFSYGAVVLEVATGRRPIERETTKVEKVRVNSNLVEWVWGVHREGNLLNAADSRLCGEFDE  
QEMRRVLMIGLACSHPDPTARPTMRSVVQMLEGESDPIVPRTRPSMSFSTSHLLMSLQDSV  
SDLNGLITLSPSSSESSFTGGHNGNCNGMELV

>Solyc10g084250.1.1 GenBank ID: KT232158

ATGACTTCAAATCTTGAAAAAATCAGGGACTTTCTCGTATGGTTCATCTTATTGCTCT  
GTTTCTGTAGTATTAGTTCAACATTTGGTAAAACGATTTTCGATTTTAAAAATTAACATTG  
AGTAGTTTAAAGCTTCTTGGTGATGCACACTTGAGTAACAACATTGTAAAGTTGACACGT  
GATCTTGCTGTACCAAATCCGGTGCCGGAAGTTCTGTATTCAAACAGTAAGATTCC  
CAGCAACCGGGGTTTGATTTCCGGCGAGTTCTCGACATTCTTTACATTTTCAGTTACTA  
ATTTGAACCCATCGTCGATTGGTGGCGGTCTTGCTTTTGCTTACGCCGGGTGATGAG  
TTAGTAGGTGATGCTGGTGGGTATATGGGAATCTTGGATGCTAAAGGGACACAAATTGG  
TACAATTGCTGTGGAATTTGACACCCTTATGGATGTTGAATCAAAGATATTAATGGAAAT  
CATGTTGGTTTGGATCTAAATCAATGATTTCAACTGAAGTTGGTAATTTGGATTCCATTG  
ATATTGATCTCAAGAGTGGTGAATTTGGTTAATTGTTGGATTGACTATTCTGGTTCTAATGG  
AGAGATGGATATATTTGTGTCATATACTAATCTCAAGCCAAAAGAATCATTTTTATCAGTT  
AATATCAATCTTGCTGAGTATGTAATGATTTTCAATGTTTGTGGGGTTTTCTGCTTCAACTC  
AAGGGAGTACTGAGATTGATAATATTGTGTTGGTGGAGTTTCAGTTTATCATTTGATGCAA  
CTCCTAATTCGGGGGCGGTGGTGGCTGAGCCACCACCGCCAGCGAATAGTTTATGAA  
CCCAACTGCAGATTCTGTCCCGTTGCCACCGCCTTCTATGGCTCCATCAGAGTCTAATAG  
TAGCAAAGGTGATTGCAAGAAAAGAGTAGTAGGAAATGTCATAGCAATTTTTGTAGACA  
AGGACCTGGAGCTGTTGTTGGTGTGGTACTGCTGGTGCATTTTTTCTTGCATTTGCTAC  
ATTGGTACTTATTTGGTTATACTCCAAAAGATTCAAGAGAGTGAAAAATTCTGAGATTGTG  
GCATCTGATATCATCAAAATGCCTAAGGAGTTGAGCTATAAAGAGCTTAAATTGGCCACG  
AAAGGTTTTCATTCCAACGAGAATTATAGGCCGTGGTGCATTTGGGACTGTTTACAAGGGC  
ATTTTATCGGATACCGGAGGCATTGTGGCAGTCAAGAGATGTAGTCATAATGGACAAGG  
GAAAGCAGAGTTCTTATCTGAATTATCTATAATTGGAACCCTTAGGCACAGAAATCTTGTG  
AGGCTTCAAGGATGGTGTGATGAGAAAGGTGAAATTTTGTGGTTTATGATCTTATGCCT  
AATGGGAGTCTTGATAAGGTGCTATTTGAATCAAGAATGGTTCTTTCATGGTTCGCATAGG  
CGAAAAATCTTGATAGGTGTTGCTTCTGCCTTGGCATATTTGCATCAAGAATGCGAAAAAC  
CAGGTGATTCATAGGGACATTAAGAGTAGTAACATTATGTTGGATGAAGGGTTCAATGCA  
AGATTAGGAGATTTTGGATTAGCAAGACAAGTAGAGCATGACAAGTCCCCCGATGCAAC  
GGTAGCAGCCGGGACAAATGGGCTACTTGGCTCCAGAGTACTTGTTAACCAGGTAGAGCAA  
CCGAAAAAATGATGTTTTTCACTATGGAGCAGTGGTTCTTGAAGTGGCTACTGGAAGG  
AGGCCAATTGAGAGGGAAACAATAAAGTTGAGAAAGTTAGAGTGAATAGCAACTTGGTT  
GAATGGGTATGGGGGGTGCATAGAGAAGGGAATTTACTAAATGCAGCTGATTCAAGACT  
CTGTGGTGAGTTTGTGATGAACAAGAAATGAGAAGGGTTCTAATGATTGGGCTAGCTTGTTC  
ACATCCCGACCCTACGGCTAGACCAACAATGAGAAGTGTAGTCCAATGCTGGAAGGTG  
AATCTGATATCCCAATTGTCCCAAGAATACTAGACCTTCTATGAGTTTTAGCACATCACATCT  
TCTAATGAGTTTGAAGATAGTGTCTCTGACTTGAATGGGTTGATCACACTTTCCCTTCA  
TCATCCGAAAGTAGCTTACCAGGGGGTCACAATGGCAATTGCAATGGCATGGAGTTGGT  
CTAA

---

>Solyc09g007510.1.1

MDVEFKDINGNHVGLDLNSMISTQVGLDLSIGVDLKSGLVNSWIDYFGSTKKNLYVSYSN  
LKPKEPFLSVTIDISEYVNDFMFVGFSGSTQGSTEIHSIEYWSTSSFDTPNPKSPPAAVAEQP  
PPPPTASLMNPTADVTTSVTSPPEQQQIAPAEANGTANAVQKNSSKCHSSFCKQGAGAVV  
GVVTAGAFFLALATLVLWLYSKFKFKVKASETMLPSDIKMPKEFSYKELKIATKGFDSRIIG  
HGAFGTVYKILSETGDIVAVKRCSHNGQGKAFFLSELSIIGTLRHRNLVRLQGWCHEKGEIL  
LVYDLMPNGSLDKALFESRMILSWQHRQKILLGVASALAYLHQECENQVIHRDIKSSNIMLDE  
GFNAKLGFDFLARQIEHDKSPDATVAAGTMGYLAPEYLLTGRATEKTDVFSYGAVVLEVASG  
RRPIDKETTSGVGLNSNLVEWVWGLHKDGSLLSAVDSKLNLEYDEKEMTRVLLVGLACSH  
PDPIARPTMRGVVQMLVGEAEVPIVPRAKPSMSFSTSHLLMTLQDSVSDLNGMITLSTSSSE  
NSFNGGGVVGGHDMDLV

>Solyc09g007510.1.1 Corrected; GenBank ID: KT232159  
MEIYSLLVLLCFFAALAAATEFDSGTLTLSSLKLLGDAPFLAVPNSGAGKVLVSKPVKFRQP  
GIDFPASFSTFFSFSVSNLNPSSIGGGGLAFVITPDDESIGDSGGYLGILDAEGGQNGNFVFEF  
DTLMDVEFKDINGNHVGLDLNSMISTQVGLDLSIGVDLKSGLVNSWIDYFGSTKKNLYVSY  
SNLKPKEPFLSVTIDISEYVNDFMFVGFSGSTQGGSTEIHSIEYWSFTSSFDTPKSPAAVAE  
QPPPPPTASLMNPTADVTTSVTSPPPEQQQIAPAEANGTANAVQKNSSKCHSSFCKQGAGA  
VVGVVTAGAFFLALATLVLWLKFKHVKASETMLPSDIKMPKEFSYKELKIATKGFDSSTRII  
GHGAFGTVYKILSETGDIVAVKRCSHNGQGKAFFSELSIIGTLRHRNLVRLQGWCHEKGEI  
LLVYDLMPNGSLDKALFESRMILSWQHRQKILLGVASALAYLHQECENQVIHRDIKSSNIMLD  
EGFNAKLGDFGLARQIEHDKSPDATVAAGTMGYLAPEYLLTGRATEKTDVFSYGAVVLEVAS  
GRRPIDKETTTSVGLNSNLVEVWVGLHKDGSLLSAVDSKLNLEYDEKEMTRVLLVGLACS  
HPDPIARPTMRGVVQMLVGEAEVPIVPRAKPSMSFSTSHLLMTLQDSVSDLNGMITLSTSSS  
ENFNGGGVVGHDGMDLV

>Solyc09g007510.1.1 GenBank ID: KT232159  
ATGGAGATTTACTCATTACTAGTTGTATTGCTCTGTTTCTTTGCTGCTTTAGCTGCTGCCA  
CTGAGTTTGTATTCTGGTACTTTAACTCTTAGTAGTTTGAAGCTTTTAGGCGATGCCCCATT  
CCTTGCTGTTCCAAATTCTGGTGCCGAAAAGTTTTGTATTCTAAACCAGTAAAGTTCCG  
GCAGCCGGGTATTGATTTCCGGCGAGTTTCTCTACGTTTTTCTCGTTTTCTGTTAGTAAT  
TTGAATCCTTCATCGATTGGAGGTGGGTTGGCTTTTGTATCACGCCGGATGATGAATCG  
ATTGGTGATTCTGGTGGCTATTTGGGGATTTTGGATGCAGAAGGAGGGCAAATGGGAA  
TTTTGGAGTTGAATTTGATACACTTATGGATGTTGAATTTAAAGATATTAATGGTAATCATG  
TGGGGTTAGATTTAAATCAATGATTTCAACTCAGGTTGGTGATCTTGATTCTATTGGTGT  
TGATTTAAAAGTGGTGATTTGGTTAATTCTTGGATTGATTATTTGGTTCAACAAAAAAT  
TGAATCTTTATGTTTCATATTCTAATCTTAAGCCAAAAGAACCATTTTTGTCTGTTACAATT  
GATATTTCTGAATATGTAATGATTTTCTGTTTGTGGGGTTTTCTGGTTCAACACAAGGGA  
GTAATGAGATTCATAGTATTGAATATTGGAGTTTCACTTCATCATTGATACAAATCCTAA  
ATCTCCGCCTGCAGCGGTGGCGGAGCAGCCTCCGCCCCCGCCAACGGCTAGTTTGTATG  
AACCCACGGCGGATGTAACACATCCGTCACATCGCCCCCTCCGGAGCAGCAACAGAT  
TGCTCCGGCGGAGGCTAATGGTACTGCTAATGCAGTACAGAAAACAGCAGCAAGTGTC  
ATAGTAGTTTTTGAAGCAAGGTGCTGGTGTGTTGTTGGGGTTGTTACTGCTGGAGCAT  
TCTTTCTAGCTTTAGCTACATTGGTACTTATTTGGTTGATTTCGAAAAAATCAAGCATGT  
GAAGGCTTCAGAGACTATGTTGCCTTCTGATATTATCAAATGCCTAAGGAATTTAGTTAT  
AAGGAGCTTAAAATCGCGACGAAAGGGTTTTGATTGACTAGGATTATAGGGCATGGTGC  
ATTTGGTACTGTCTATAAAGGGATTTTGTCCGAGACTGGTGATATTGTTGCGGTAAAGAG  
GTGTAGCATAAATGGACAAGGGAAAGCTGAGTTCTTTTTCTGAATTATCGATAATCGGAAC  
ACTTAGACATAGAAATCTTGTAGACTACAAGGATGGTGTGTCATGAGAAAGGTGAAATCTT  
GTTAGTTTATGATTTGATGCCAAATGGTAGTCTTGACAAGGCGTTATTCGAGTCGAGAAT  
GATCCTCTCGTGGCAACACAGGCAAAAATCTTGTAGGTGTTGCTTCTGCATTAGCATA  
TTTACATCAAGAATGCGAAAACCAGGTGATACATAGGGATATCAAGAGTAGTAACATCAT  
GTTGGATGAAGGGTTCAATGCAAAGTTAGGAGATTTTGGACTAGCACGACAAATCGAAC  
ACGACAAGTCCCCCGATGCAACGGTAGCAGCCGGTACAATGGGGTATTTAGCACCAGAA  
TACTTGTAAACAGGTAGAGCAACTGAGAAAATGATGTGTTTAGTTATGGGGCAGTGGTT  
CTTGAAGTGGCAAGTGAAGGAGGCCTATTGATAAAGAAACAACAAGTGGTGTGG  
ATTAACAGCAATTTGGTTGAATGGGTGTGGGGATTACACAAAGATGGGAGTTTACTATC  
AGCAGTTGATTCAAAATGAATCTTGAGTATGATGAAAAAGAAATGACAAGAGTGTGTTA  
GTTGGTTTTGGCTTGTTCACATCCTGACCCTATAGCTAGGCCAACAATGAGGGGGGGTGGT  
ACAAATGTTAGTAGGTGAGGCTGAAGTACCAATTGTACCAAGGGCTAAACCATCAATGAG  
TTTTAGCACATCTCATTTGTTAATGACATTGCAAGATAGTGTCTGACTTGAATGGTATG  
ATCACACTTTCACTTCTTCATCAGAAAACAGTTTCAATGGTGGTGGTGTGTTGGTGA  
CATGATGGAATGGACCTAGTTTAG

---

>Solyc03g043710.1.1 GenBank ID: KT232160  
MSSNVCCIALFIASLLIPFVNSVFSQISRFDPVIDILYEGDAVASVGEVEFNKANYLCRVAHAI  
YREKVPLWDPDHDSTKLADFSTRFSFTIDTQNRSSYGHGIAFFLAPVGFRIPPNSDGGFLGLF  
NTTSDSAQSQIVSVEFDTFSNVEWDPPEFHVGINNNSIASSVTAPWNVSLHPIETWITYNAT  
TNNLSVIWNYGTGPNSSMFYIINLRDVLPPVWTIGFSAATGLNVERHTLESWEFSSSLVITEL  
GGNDREKIGLIAGLTTLGGILLVSAILALIVLRKRRRNVKGNPETISLTSFNDDLEKAGPRKFS  
YKELDTSTNHFSEERKLGEGGFGEVYKGYLIDLIAVAVKKISRGSKQKKEYITEVKVISRLR  
HRNLVQLIGWCHDQGEFLLVYEFMPNGSLDFHLFGKRNPPLSWTMRYKISLGLASALLYLHEE



GGTAACGGTAGTTTTGCTGATGGACTAGCCTTTTTCTTAGCTCCTGTTGGTTCGAGTATT  
CCAGTTGGTTCGTCTGGCAGTGGCCTTGGTCTTGTTAAAGCTGAGACAGAAAACATGCC  
ATCATATGAGTCATTTGTTGCTATAGAGTTCGATACATTTGTTAATACCTGGGACCCTTTT  
GGCATAACATGTAGGCATCAATATAAATTCTATGGAATCTGTTGCTACTAAAATATGGGTAA  
ATGACATTAACCTTGGGAAGAAAATGATGCTTGGATTAGTTACAATGCTAGTTCCAAGG  
TTCTTGAAGTTGTTTTACAGGATTTGAGAAAAATATAATCGAGACAACTAAGCTACGC  
CGTTGATCTGAGGGATTATTTGCCTGAGAATGTTAGTTTTGGCTTCTCAGCATCAACTGG  
ACAATTGTTTCAGAAAAACAATGTCAAGTCTTGGGATTTCAATTGAGTTTTGATGCTATC  
ATAGTTCCAGAACATGTCAATCAGCCTAGTGCAAGTCCTCTATACAACTTCAAGATCCA  
AAAAATCATCCTATTCAAGGTCAAACCTCAAATGATCCTCCAATTACTCATGTTCAAGAAC  
CAAAGGGTCTCTCTCAAAAAGTACTCAGGACCTCGGGAAAAGGAAGCAAGGGACTAGTA  
GTTGGATCAAGCATAGGATTACCTATTCTGATTCTTGGTTTGATAACTGCCAGTTGCATTT  
TGTGGAGGAAAAAGAGAAAAGGAGATGAGAAAAGAAAATGTCTTCATTGATCTAGATATGG  
ATGATGAATTTGAAAAGGTTACCGGTCTAAGAAGTTCTCGTATGGTGAATTAGCTCGTG  
CAACAAACAACCTTTGCTGAGGGACAGAACTTGGTGAAGGAGGATTTGTTGATGTTTATA  
AAGGTTTATTGAAGGAATGTAACCTCATATGTAGCTGTTAAGAGAGTATCAAAGGGTCTA  
AACAAAGGATAAAGGAGTATGCATCAGAAGTAAGATCATCAGTCGATTAAGGCATAGA  
AATTTGGTTCAACTTATCGGTTGGTGCCACGAGAAAAGAGAAGCTGCATCTTGTTTACGAA  
CTGATGCCCAATGAGAGCCTAGATAAACATCTTTTCAAAGAAAAGTCATTGTTGGTCTGG  
GAAATCAGGTGGAAAATTGCTCAAGCAATTGCCTCAGCTTTACTGTATCTACACGAAGAG  
TGGGAACAATGCGTAGTCCATAGAGACATAAAAGCAAGTAATGTCATGTTGGATTCAAAC  
TTCAACGCTAAATTAGGTGATTTTGGGTTGGCTAGGCTTATTGACCATGACAAAGGATCA  
CAAACAACGATGCTAGCAGGGACCGTGGGGTATATGGCACCGGAATGTATTATGAATGG  
AAAAGCTAGCAAGGAGTCAGATGTATACAGCTTTGGAATAGTAGCATTGGAAATAGCAAG  
TGGAAGAAGATCAATAAATATTAAGCACCAGAAGATCAAGTGAAGATTGTTGAATGGGT  
GTGGAGCCTGTATGGAACGGGAGAGCTAGTCGAAGCAACTGATCCAAGATTGAATAAAA  
TGTTAATGAGAAAAGAAATGGAACGTTAATGGTCATCGGTCTATGGTGTGCTCATCCAG  
ACAACAACCTGAGGCCATCAATAAGGCAAGCTATCCATGTTCTAAACTCTGAAGCTCAAT  
TACCAAATCTTCCATCAAGAATGCCAGTTGCAACATATTCACCCCTCCATTGAATATGTT  
TTCCTCTCCATTTTCAAATACTTATGAAGTTAGTATGCAGGAGCAGACTATGACTTACACT  
GTTTCATCAAGTGTCTATACTTCGTCAGCTGCTTCATCGACAAAATCACTTTTGTA

---

>Solyc10g047810.1.1 GenBank ID: KT232162  
MASFAYLVCLLLIIPFVNSLSFNFDNFNTNDQNLTYEADAYPANSVIQLTKNQDRDSASNDSIGR  
VTYSEALYLWDKASRNLTDFTHFSFGINSQGRNNYADGLAFFLAPAGSRIPDNSAVGGSLG  
LAVSGQNTSRNHSFVAVEFDTFKNFYDPKGDHVGVDINSMVSVVNVTFWFSSIPNGKRTDA  
WITYNSTSKNLSVVFVTFGQQGNTTLTVLQNLVYNIDLREYLPEWVTFGFSGATGLFALQTI  
YSWNFTSSLKHNDNITDPDVPLRPVPEDTSSKNKSLVIGLISGGCVLVALSVIILFAFRKR  
KVREDEDEDEDDIIDGSMTEFERSTGPKKFLYSELVRCTNNSFREMLGQGGFGGVYKG  
YLSENSYIAVKRVSRESKQGIKEYASEVRIISRLRHKHLVQLIGWCHQKRELLLVYEFMPNG  
SLDYHLFKGRSHLTWPIRFKIAQGLASALLYLHEWEQIVVHRDIKSSNIMLDSNFNAKLGDF  
GLARLVHDKESQTTVLAGTMGYMAPECVTTGKASKETDVYSFGVVVLEIGCGRKSIENKAE  
EHQVNIQWVWRLYGMGNLREAVDPRLSSEFNEEEMEHLIVGLWCSPDNNCRPSIRQAI  
QVLNLEAPLPNMPVPTYCSRSQYGSTTSFTSPYDSNAPWNSEIQSSVTRDYTGSSNNT  
AASASSPSASLLYTC

>Solyc10g047810.1.1 GenBank ID: KT232162  
ATGGCTTCTTTGCATACCTTGTGGTCTTTTATTAATAATCCCCTTTGTCAATTCATTGTC  
CTTCAATTTTATAGTTTTAACACAAATGATCAGAATTTAACATATGAAGCAGATGCATAT  
CCAGCAAACAGTGTAATTCAGCTCACCAAAAACCAGCGAGATAGTGCTTCAAATGATAGC  
ATAGGCAGAGTCACATATTCAGAAGCTCTCTATCTTTGGGACAAGGCCTCTAGGAATCTC  
ACTGATTTACAACGCATTTCTCCTTTGGGATCAACTCACAGGGCAGAAATAATTACGCT  
GACGGTCTTGCCTTCTCCTTGGCTCCTGCAGGTTCAAGAATCCTGATAACTCAGCCGTA  
GGAGGCAGCCTTGGCCTTGCAGTTAGTGGTCAACAAAATACATCGAGAAATCACTCTTTT  
GTTGCTGTGGAGTTTGCACCTTTAAGAACTTTTATGATCCAAGGGTGATCATGTAGGT  
GTAGATATCAACTCTATGGTATCTGTTGTTAATGTGACCTGGTTTAGTAGCATTCAAATG  
GTAAGAGAACTGATGCCTGGATTACTTATAATTCAACTTCAAAAATCTTAGTGTGTCTT  
CACCGGTTTCAAACAACAAGGTAATACTACACTCACAGTCCTGCAGAACCTATCTTACAA  
TATTGATCTGAGGGAATATTTGCCAGAATGGGTCACTTTTGGCTTCTCAGGTGCAACAGG  
AACTCTCTTTGCATTACAAACCATATACTCTTGAATTTTACTTCTTCTTAAAGCATAATG



ACAATATAACAGATCCAGATGTGCCCTACCAAGACCTGTGCCAGAGGATACTTCAAGC  
AAAAATAAGTCAGGACTAGTGATTGGATTGATTTCTGGCGGTTGTGTTTTGGTAGCACTA  
TCTGTTATAATATTGTTTGCATTTAGGAGAAAGAGGAAGGTGCGAGAAGATGAAGATGAA  
GATGAAGATGATGATATTATTGATGGTTCCATGACTAATGAATTTGAAAGAAGCACAGGA  
CCAAAGAAGTTTTTGTACAGTGAGTTGGTCAGATGTACAAATAACTTTTTCGCGGGAAGAG  
ATGCTTGCCAGGGCGGGTTCGGAGGTGTTTATAAAGGATATCTCAGTGAATCCAACTC  
CTATATTGCTGTTAAGAGGGTTTCAAGGGAGTCAAAGCAAGGAATAAAAGAGTATGCATC  
AGAAGTCAGGATCATCAGCCGGTTAAGACATAAACATTTGGTGCAACTCATTGGTTGGTG  
CCATCAAAAAGAGAAGCTTCTACTTGTCTACGAGTTTATGCCTAATGGAAGCTTAGATTAC  
CATCTTTTCAAAGGAAGAAGCCATTTGACATGGCCAATAAGATTCAAGATTGCTCAAGGT  
TTGGCCTCAGCGTTGCTTTATCTACACGAAGAATGGGAACAGATTGTGGTTCATAGGGA  
CATAAAGTCCAGCAATATTATGTTGGATTCCAATTTAATGCTAAACTTGGGGATTTTGGT  
TTAGCTAGGCTAGTTGACCATGATAAGGAATCCCAAACAACAGTTTTGGCAGGCACGAT  
GGTTACATGGCTCCTGAATGTGTCAACACTGGCAAAGCTAGCAAGGAAACAGATGTCT  
ATAGCTTTGGTGTGTCGTGTTGAAATAGGTTGTGGAAGGAAATCTATTGAAAATAAAG  
CTGAGGAGCATCAAGTAAATATTATCCAATGGGTTTTGGAGACTTTATGGGATGGGAAATC  
TTCGTGAAGCAGTTGATCCTAGACTCTCATCAGAGTTCAATGAAGAGGAGATGGAGCAC  
TTGCTAATTGTTGGCTTATGGTGTCTCATCCAGATAATAATTGCAGACCTTCTATAAGGC  
AAGCAATTCAGGTGCTTAATTTAGAAGCTCCGTTGCCATACTCCCTCCAAACATGCCTG  
TACCGACATATTGCAGTCGGTCACAATATGGATCAACTACTTCTTTTACATCACCGTATGA  
CTCCAACGCTCCTTGAATTCTGAAATACAGTCTTCAGTGACTAGAGACTACACTGGTTC  
TTCAAATAACACAGCAGCTTCTGCATCATCTTCGCCTTCAGCATCACTTCTGTACACATGT  
TGA

---

>Solyc10g047680.1.1 GenBank ID: KT232163  
MVVFASLSSLKYFLLIPLVTSLSFNFDTFPNDHNVYERDASPENGETKYGDGFAFFLAPA  
GSTIPYNTTRGGSLGLTSNNERLNL SINHFVAVEFDTYQNPYDPKGDHMARKLMPGLTIILYR  
KILLSSLVFNHKRIISVTVLQNL SYNLDLREYLPEWVTFVFTDGAGRFRALQRIYSWNFTSSL  
DNMTDTGVTL SNIKPEDAPTKLRLVVG LICGGSVLVAVCTLVLF FWRKSKEEMLGRGGF  
GGVHKGYLSESTLIFHEKRELLLVYEFMPNSSLDTHIFSRKIHLEWPIRFKISQGLASALLHLHE  
EWEQCVVHRDIKSTNIMLDSNYNAKL GDFGLARLVEHGK GSETTVLAGTMGYMAPECVTTG  
KANKETDVYSFGIVVLEIGCGRKPIDPKAEEHQVNIVDWWRLYEMIKSSLSIQVLNFEAPLPT  
LPRNLPVPTYCSFSRHLPTISVSSKHETNFTETALAQIQHSVNKNNSHSSINKTSSSSTSVLYP  
SQCCAVITLNFVFR

>Solyc10g047680.1.1 GenBank ID: KT232163  
ATG GTT G T T T T T G C C T C T T T A T C T T C T C T C A A A T A C T T C C T T C T T A T C C C T T T A G T C A C T T C  
A C T C T C C T T C A A T T T T G A T A C T T T T A C A C C C A A T G A T C A C A A T G T T A C C T A T G A G A G A G A T  
G C T T C T C C A G A A A A T G G T G C A A T T C T A A T C A C C A A A A C C T C C T C A A T C A T G A T T T A A T G C  
T A G T A T T G G T C G A G C T A T A T A T T C A A A A C C A C T C C A T C T C T G G G A C A A G G C C T C C C A A A A  
T C T C A C T G A T T T C A C T A C A C A T T T C T C C T T T A G C A T T A A T T C A C A G G G A G A A A C T A A A T A T  
G G T G A T G G T T T T G C C T T C T T C C T C G C C C T G C A G G T T C A A C C A T T C C T T A T A A C A C A A C A  
A G A G G T G G A A G T C T T G G C C T T A C A A G T A A T A A T G A A C G A C T A A A T T T A T C G A T T A A T C A T T  
T T G T T G C G G T A G A G T T T G A T A C C T A T C A G A A C C C G T A T G A C C C A A A G G G T G A T C A T G T A G  
G T A T C G A T A T C A A C T C A A T G C A A T C T C T T G T T A A T G T G A C T T G G T T T A G T A G C A T T C C G A A  
T G G C A C G A A A A C T G A T G C C T G G A T T A A C T A T A A T T C T A T A T C G A A A A A T C T T A C T G T T G T C  
T T C A C T G G T T T T C A A C C A C A A G A G A A T A A T A T C A G T C A C T G T C C T G C A G A A T C T T T C T T A C  
A A T C T T G A T C T G A G G G A A T A T T T G C C A G A A T G G G T C A C T T T T G T C T T C A C T G A T G G A G C A  
G G A A G G A G A T T T G C A T T A C A A G A A T C T A T T C T T G G A A T T T T A C T T C T T T A G A T A A T A T  
G A C A G A T A C A G G G G T G A C C T T A T C A A A C A T C A A G C C A G A G G A T G C A C C A A C A A A A A C T A  
A G T T A A G A C T T G T A G T T G G A T T G A T T T G T G G T G G T A G T G T T T T G G T T G C A G T A T G T A C T T T  
G G T A T T A T T T G C T T T T T G G A G A A A G A G T A A G G T C A G A G A A A A T G A T T A G G T C T T T G A T G G  
T T C C A T G A C T A A T G A A T T T C A A T A A G T G C A G G A C C A A G A A G T T C T T G T A C A G T A A G T T G  
G T T A A A T G T G C A A A T A A T T T T C A C A G G A A G A G A T G C T T G G G C G G G G T G G A T T C G G A G G  
T G T T C A T A A G G A T A T C T C A G T G A A T C A A C T C T T A T A T T G C T T T T A A G A G G G T T T C A A G G G  
A G T C A A A G C A A G G A A T A A A A G A G T A T G T A T C A G A A G T C A G G A T C A T C A G C C G G C T A A G A  
C A A T A A A C A T T T G G T G C A A C T C A T T G G T T G G A G C C A T G A G A A A A G A G A A C T T C A C T T G T  
T T A T G A G T T T A T G C C T A A T A G T A G C T T A G A T A C C C A T A T T T T C A G T A G A A A A A T T C A T T T G  
G A A T G G C C A A T A A G A T T C A A G A T T T C T C A A G G C T T G G C C T C A G C G T T G C T A C A T C T A C A T  
G A A G A A T G G G A A C A A T G T G T G G T G C A T A G G G A T A T A A A G T C T A C C A A T A T T A T G T T G G A T

TCTAATTACAATGCCAAGCTTGGGGATTTTGGGTTAGCTAGGCTAGTTGAACATGGTAAG  
GGATCTGAAACAACAGTTTTAGCAGGCACAATGGGTTACATGGCTCCTGAATGTGTCAC  
CACTGGTAAAGCTAACAAGGAAACAGACGTCTATAGCTTTGGTATTGTCGTGTTAGAAAT  
AGGTTGTGGAAGGAAACCTATTGATCCTAAAGCAGAGGAGCATCAAGTAAACATTGTCG  
ATTGGGTTTGGAGACTTTATGAGATGATAAAATCTTCTTTAAGCAGCTAATCCGAAACTAT  
CATCAGAGTTCAATGAAGAGGAGATGGAGTATTTGCTAATTGTTGGCTTATGGTGTGCTC  
ATCCAGATAATAATTGCAGGCCTTCTATTAGGTAAGCAGTTCAAGTGCTTAATTTGAAGC  
TCCATTACCCACCCTCCCTCGGAACCTTGCCTGTGCCACATATTGCAGCTTCTCACGCCA  
TCTTCCAACCTATTTAGTTTCATCAAACATGAAACCAACTTTACAGAAACCGCCCTTGCC  
CAAATCCAGCATTAGTAAACAAAAACAATAGTCATTCTTCAATAAACAAAAACATCTTCAT  
CTTCAACCTCAGTTTTGTATCCAAGTCAATGTTGCGCTGTTATAACCTTGAATTTTGTCTT  
CCGTTAG

---

>Solyc10g047700.1.1 GenBank ID: KT232164  
MDCVMDIMVDKNQPAFVPGSVFPDKHFAAGEGLGLACVDQYSSKNHHFVAIEFDIFTNYY  
DPRGDHNL SYILDMKEYLLEWVTLGFSSAIAIFYAIHTIYSWNFTSSLNNGNITYPDIPIPCVL  
NLYVPLQSLVLPNPNVPLPRPMLNPDVPLPSHVEDTSKKKKLVRYTNNFSREKFLGQGGFG  
YVCKRYMKESNSYIDVKGISRETNQEIKEYASEVRIIRLTHKHMVQLIGRCHQKRELLHVYEF  
MPNGSLDYNLYKGQSHFTCTIRFKNSEGTMCCRDLCEVTTSKASKETDIHSFSFVALEIAYG  
RKPSDPKAEHQNIVDWVWKLYRIENISDAVDLRLLS

>Solyc10g047700.1.1 GenBank ID: KT232164  
ATGGATTGTGAATGGATATCATGGTGGATAAAAATCAGCCAGCCTTTGTACCAGGTATA  
TTATATTGGATTTTTAATCTTTCTTATTTAGCGTGAATAAAAATTTTACAAAACCTTCAAAT  
GGATATATATGAATTGTTAGTGGATGCATAGATTCTATCATCTATAGTTATCCATATGCC  
TCTTGACACATCTAGTATAGCATAACAAAAGGGACAAGGCCAAAAGTATACAATGACAAAA  
ATCCCTAAGACATATTTAACTAACTAAGGACTATAACTCATTTTATTGTATTTTTGTACA  
CCTTGTGGTGGCACACTGCATGACTCCACATAGTTGAGTCGTGTGGGAGATGTTTGGGT  
ACCACGCAAGCCAAAAAGTATACACAAATATTTAAAAAATGGATCAAGAGGGTAATAATA  
CCTTATAATTTAATGTGTCTCTGAAATTTTGCATAATCTAGGGGATAGATGTATCATATC  
CCTAAAAAACAAATTCTACATATTCTAATAGCAATATATAATTAGATTCTTACTAAAAATTA  
GATTCTTGTGCAACAGGGAGTACCCAAAGCACCTATAGTCCTTGAAGGGAGTTTTAAAA  
ATAATAATCTTGATGAAAGGAGAGTTTGTTTTTTACCCATTACATGTTTTCTCAATGTAGTT  
TAAATGACTTTCTATATAAGTTATCATCAATGAAAAATAACTAAGTGTCTCAATTGCAAG  
ATTGTTTGTTTTTTCCACTTAATGCAATAAATAAATAAATATTTTAGACACTTGAAAATATAAAA  
CATTACTTTATTATTTGACTAGTGTAGAAACATACATTTGCCTAACAATGGTTGTTTTGC  
ATCTTTATCATACTTTGTTTTGATAATCACCTTTGTATCTCACTATCCTTCAATTTAATAGT  
TTCAATCCCAATAATGAGAATATAACATATGAAGCAGATGATTATTCAGAAAACGGTGTAA  
TTTATCTCACCAAAAATAGTTCAGTCATAGGCTGAGCTACATATTCTGAAACACTTTATAT  
AAGAGACGAGGACTCTGGGAATGTCACAGATTTCTCAGTGCATTTTTCTTCAGAACCAA  
TTCTCATGGAAGAAACCTATATTCTGATGGTCTTAACTCTTTCTCTCCCTGCAGGTTCA  
GTATTTCCCGATAAACACTTTGCTGCAGGAGAGGGACTTGGCCTTGCATGTGTTGATCAA  
CAATATTCATCAAAAAATCACCATTTTGTGCTATCGAATTTGACATTTTTACCAACTATTA  
CGATCCACGGGGTGTATCATGTGGGTATCAATATAAACTCCATTCAACCTGTTTCTAATGT  
GACCTAGTTTAGCGGAACCTCCAATGGTAGATGCCTGGATTACTTATAGTTCAATCTCAA  
AAAATCTTAGTGTTGTCTTTAATGGTTTCAAACCACAAGGGAATACTATTTTACCATTCT  
GCAGAACCTATCTTACATACTTGATATGAAGGAATATTTGCTAGAGTGGGTCACTCTTGG  
CTTCTCAAGTGAATAGCAATCTTCTATGCAATACATACCATATATTCTTGAATTTTACTT  
CTTCTTAAACTATAATGGAAACATAACTTATCCAGATATACCTATACCATGCCCTGTGCT  
TAATCTATATGTACCCCTACAAAGCCTTGTGCTAAATCCAAATGTACCCCTACCAAGACCT  
ATGCTAAATCCAGATGTACCCCTACCAAGCCACGTGTCAGAGGATACTTCAAAGAAAAAA  
AAAGTTAGGAGTAGTGATTGGATTGATTTTTGGTTTTTGTGTTTTGATAGCACTATTTGTTT  
TTATATTGTTTGCATTTTTTAAAGAAATAGGAAGGTGAGAGAATATGAAGATGATGATGATA  
TAATTGATGGTTCCATGACTAATGAATTTGAAGGGAGCACAAGACCAAGAAGTTTTTGT  
AAAGTGAGTTGGTTAGATATACAAATAACTTTTCGCGGGAAAAGTTTCTTGGCCAGGGTG  
GGTTTGGATATGTTTGTAAAAGATATATGAAGGAATCCAACCTCCTATATTGATGTTAAAGG  
GATTTCAAGGGAGACAAACCAAGAAATAAAAAGAGTATGCATCAGAAGTTAGGATTATTCG  
GCTAACACATAAACATATGGTGCAACTCATTGGTCGGTGCCATCAAAAAAGAGAGCTTCT  
ACATGTCTATGAGTTTATGCCTAATGGAAGCTTAGATTACAATCTTTACAAGGGACAAAG  
CCATTTTACATGTACAATAAGATTTAAGAATTCTGAAGGCTTGGCCTAAGTGTGTTTTAT

AAACATGAAGAATCAGAACAACCTCTATATTCTGTTGGATTCCAATTTCAATGCCAAGCTT  
GGGGATTTTTTTTTACTAGGCTAGTTGACCATGATAAGGGATCTCAAACAACAGTTTTGG  
CAGGCACGATGTGTTGCAGGGATCTTGAATGTGTCACCACTAGCAAAGCTAGCAAGGAA  
ACTGACATCCATAGTTTTAGTTTTGTCGCATTAGAGATAGCTTATGGAAGGAAACCTAGT  
GATCCCAAAGCTGAGGAGCATCAAATTAATATTGTTGATTGGGTTTGGAAACTTTACAGG  
ATAGAAAATATTAGTGATGCAGTTGATCTTAGACTCTTATCATAG

---

>Solyc03g112310.1.1 GenBank ID: KT232165  
MPPLSLLFILINFTIFPSIFAIEFLFNSFTANTTPALTLIDDARLEPPVIRLTNDSNQFSLGRAFYP  
SQIPIKSASNSTSISSSFSTQFIFSVLPDDSSSPGFIAFVLSASTSPPNALSSQYFGLFSNATV  
HTVAPLLAVEFDTGRNPEFNDPDRNHIGIDLNSIESIVTQTAGYSSDSDSFVPLNLRSGQNIH  
AWIDFNGPEFEINVTIAPAGMSRPARLLSYRNPIIANYMSAQMYMGFSASKTQWVEAQRLL  
AWSFSDSGVARDINTNLPVFQLENSGSSLSSGAIAGIVIGSVAVLGLCFVYWFVWRKKE  
EDDVIEDWELDYWPHRFSNEELSQATKGFSDKDELLGAGFGKVYKGTLANNTEAVKCVNH  
DSRQGIKEFMAEISTIGRLQHKNLVQMRGWCRKGYELMIVYDYM PNGSLNKWIFDKPEKVM  
NWVDRRRVLADVAEGLNYLHHGWEQVVVHRDIKSSNVLLDSEMRGRLGDFGLAKLYTHGG  
VPNTTRVVGTLGYLAPEVVTRANPTAASDVYSFGVVVLEVACGRRPIDLGIVLEEEVLDWV  
RQKYREGRLCEAADKRIKEQCSEEEMAILKLGLTCCHPDPLRRPTMKEVVAVLLGENVDAT  
PNELIVELAPTESNTRDRSDWSTESEPLSAV

>Solyc03g112310.1.1 GenBank ID: KT232165  
ATGCCACCATTACTGTTGTTTCATTCTCATCAATTTTACAATCTTCCCATCCATTTTCGC  
CATCGAATTTCTCTTCAACTCCTTCACTGCTAACACCACCCCTGCACTCACCTCATCGA  
CGATGCCCGCCTTGAGCCACCAGTTATCCGCCTCACAAATGACTCCAACCAATTTTCCCT  
TGCCGAGCTTTTTACCCATCTCAAATTCCTATAAAATCCGCTTCAAATTCACCTCAATT  
TCTTCTCTTTCTCTACCCAGTTCATCTTCTGTACTCCCTGATGATTCTCTAGTCCCG  
GATTCGGAATTGCTTTTGTCTCTGCTTCAACTTCTCCGCCTAATGCCCTCTCCAGTCA  
ATACTTTGGACTTTTCTCTAACGCCACCGTTCACACGGTGGCCCCACTTCTCGCCGTCGA  
GTTTGATACGGGTCGTAACCCGGAATTAATGACCCAGATAGAAATCATATCGGGATTGA  
TCTTAACAGCATTGAATCTATTGTTACCCAAACGGCTGGGTATTATAGTTCTTCTGGTAAT  
GATAGTGATTCTTTGTGCCTTTAAATTTGCGGTCTGGGCAAATATAACATGCTTGGATTG  
ATTTAATGGACCTGAATTTGAGATTAATGTTACTATAGCTCCGGCGGGTATGTCACGGC  
CTGCTAGGACTTTGTTGAGTTATAGAAACCCATAATTGCGAATTACATGTCTGCCCAGA  
TGTATATGGGGTCTCTGCTTCAAAGACTCAATGGGTTGAGGCGCAAAGACTTCTAGCTT  
GGAGTTTCACTGATTCTGGAGTTGCAAGGCTATTAACACTACGAATTTGCCGTTTTTT  
AGCTGGAAAATTCGGGTCTTCGCTATCTTGTGCTATTGCTGGAATTGTTATTGTT  
CTGTGGTTGCTGTGTTGGGTTGTTTATTTGATTTTTATTGTTTTGGTGGCGTAAGAAGG  
AAGAAGATGATGTGATTGAAGATTGGGAACCTGATTACTGGCCTCATCGATTTTCAAATG  
AAGAGCTTAGCCAAGCTACAAAAGGGTCTCTAAAGATGAGCTACTTGGAGCTGGTGGGA  
TTCGGTAAAGTATACAAGGGAACATTAGCTAATAACACAGAAGTGGCAGTGAAATGTGTG  
AACCATGACTCAAGACAAGGAATTAAGGAATTCATGGCTGAGATATCTACTATCGGAAGG  
CTTCAACACAAGAATTTAGTACAAATGAGAGGGTGGTGTAGGAAGGGGTATGAACTTATG  
ATTGTGTATGATTACATGCCTAATGGGAGTTTGAATAAATGGATATTCGATAAGCCGGAG  
AAGGTTATGAATGGGTAGACCGGAGGAGGGTCTAGCTGATGTTGCTGAGGGGTTGAA  
CTATTTGCATCATGGTTGGGAACAAGTTGTTGTACATAGGGATATTAATCTAGCAATGTT  
TTGTTAGATAGCGAAATGAGAGGTAGATTGGGTGATTTTTGGGCTAGCTAAGTTGTACT  
CATGGTGGTGTCCCTAATACTACTAGAGTAGTAGGTACATTAGGGTACTTGGCACCTGAA  
GTGGTGACAAGGGCTAACCCAACCTGCTGCTAGTGATGTTTATAGTTTTGGGGTGGTGGT  
TTTGGAGGTGGCATGTGGGCGAAGGCCGATTGACTTAGGGATTGTGTTGGAGGAAGAG  
GAAGTGTGATTGATTGGGTTAGACAAAAGTACAGGGAAGGGCGATTATGTGAGGCAGC  
AGATAAAAGGATCAAGGAGCAGTGTTCCGGAGGAAGAAATGGAAGCTATATTGAACTAG  
GACTTACATGTTGTCACCCTGATCCTCTCCGTCCGCCTACTATGAAGGAGGTTGTTGCTG  
TATTGCTTGGTGAAAATGTGCGATGCAACGCCAAATGAGTTGATCGTTGAATTAGCACCTA  
CTGAAAGCAACACGAGAGATAGAAGCGACTGGTCAACTGAGGAATCAGAGCCACTTTTCG  
GCTGTGTAG

---

>Solyc05g053010.1.1 GenBank ID: KT232166  
MAKQITLTLFLILCILPSRTVFSDEFVYNGFNGVEASNLTVNGVAQILKNGALKLTNETSRVVG  
HVFYKNPIKFKNSQYGVKSSSFSTAFAGFVPEYAKLGGHGFATISRSEEMKGALPSQYLGLL

SSSNVGNFSNHVFAVEFDTVQDFEFGDISDNHVGIDLNDLKSNASVNASYFSEGLSKQKLF  
LQSGKTIQAWIDYDSSRNLLNVSLSLSSSTKPAFSILSFPVDLSLVFEEFMYVGFSASTGLLASS  
HYIFGWSFNMGIAQSLNLDLSPFLPKTKKQDQTLIVATAVSAVFFAFGLILALYVIWKIKKIDVI  
EPWELEIGPHRFSYKELKKATRGFRDKELGFGGFRVYKGTLPKTNIVVAVKRIHHEAKQG  
LQEFVSEIATIGRLRHRNLVQLLGCRRRGDLLLLVYDFMSNGSLDKYIYDEPRVTLTWDQRF  
KVIKGVASGLLYLHEEWEQTVIHRDIKAGNVLLDSDMNGRLGDFGLAKLYEHGENPSTTRV  
GTLGYLAPELTKTGKPTTSSDVFAFGALLLEVVCGRRIEAKALPEELILVDWVWDKWNQDVI  
LEVVDSRLNGEYDEMEAIMVLKGLMCSNNTPSKRPSTRLVVRYLEGEVTLPETLAAPGEYD  
GKKGGTSGMELDDFIDSYPSSSYFEKVSTWSSAYDGEEDIDIEANSVAPLTDSGREDNR

>Solyc05g053010.1.1 GenBank ID: KT232166

ATGGCCAAACAAATTACGCTAACCCCTTTCTTGATTCTCTGATTTTTGCCGTCAAGAACAG  
TTTTTCTGATGAATTTGTGTATAATGGCTTAATGGGGTTGAAGCTAGTAATCTTACTGT  
AAATGGGGTTGCTCAGATTTTAAAGAATGGTGCTTTAAAGCTCACAAATGAAACATCTAG  
AGTTGTTGGTCATGTTTTTACAAAAATCCAATTAATCAAGAATCCCAATATGGTAAA  
GTTTCTCCTTTTCTACTGCTTTTGGGATTGTTCCCTGAATATGCTAAGTTAGGTG  
GGCATGGTTTTGCTTTTACAATCTCAAGGAGTGAAGAGATGAAAGGGGCTCTTCCTAGTC  
AGTATTTAGGCTTTTTAAGTTCAAGTAATGTAGGGAATTTTTCAAATCATGATTTGCTGTT  
GAGTTTGATACTGTTCAAGATTTTGAATTTGGTGATATTAGTGATAATCATGTTGGTATTG  
ATTTGAATGATTTGAAGTCTAATGCTTCAGTAAATGCTAGTTACTTCTCTGAAGGAAGTTT  
GAGTAAGCAGAAGCTTTTTCTCAGAGTGGAAGACAATTCAAGCTTGGATTGATTATGA  
TTCAAGTAGAAATCTGTTGAATGTTTCACTTTCACTTTCTCAACAAAACCAGCTTTTTCAA  
TATTGTCCTTCCCTGTGGACCTTTCTAGTTTTGAGGAATTTATGTATGTTGGATTTTCT  
GCTTCAACTGGTTTGGCTGCTAGTTCACATTATATTTGGTTGGAGTTTCAATATGAATG  
GGATAGCACAAATCTTGAATCTTGATTGCTTTCCTTTCTCCCTAAGACTAAGAAGGATCA  
ACAATCTTGATTGTAGCTACCGCGGTATCGGCTGTTGTGTTTTTGCATTTGGACTCATT  
TTAGCCTTGTATGTCATTTGGAAAATCAAGAAAATAGATGTGATTGAGCCTTGGGAAGCTT  
GAGATAGGTCCACATAGGTTTTCTTACAAGGAGTTAAAGAAGGCTACAAGGGGTTTTAGA  
GATAAAGAGTTACTCGGGTTTGGTGGATTTGGTCGAGTTTATAAAGGAACATTGCCTAAG  
ACGAATATTGTTGTTGCTGTTAAGCGAATACATCATGAAGCAAAACAGGGTCTTCAAGAA  
TTTGTGTCTGAAATCGCGACTATTGGTCGCCTTAGACATAGAAATTTGGTTTCAAGCTTTT  
GATGGTGTCCGGCAAGAGGTGATTTGTTACTTGTATGACTTTATGTCTAACGGAAGCT  
TAGATAAATACATTTACGATGAACCAAGAGTTACTTTAACTTGGGATCAGAGGTTCAAGG  
TTATTAAGGTGTGGCTTCTGGTCTTTGTATTTACATGAAGAATGGGAACAAACAGTGAT  
CCATAGAGATATTAAGCAGGGAATGTGTTGTTAGATTCCGATATGAATGGACGACTTGG  
AGATTTCCGACTTGTAAAGTTATGAGCATGGAGAAAATCCTAGCACAAACAGAGTAGT  
CGTACGTTGGGTTACTTAGCTCCAGAAATTAAGACCGGGAAGCCCACGACAAGTT  
CAGATGTTTTTGCCTTTGGTGCCTTGGTGCCTGCTAGAAAGTTGTTTGTGGGAGGCGCCGATT  
GAGGCAAAGGCATTGCCTGAGGAGTTAATCCTAGTGGATTGGGTATGGGATAAATGGAA  
TGACGGTGTCAATCTTGAAGTGGTTGACTCGAGATTAATGGCGAGTATGATGAGATGG  
AGGCCATAATGGTGCTTAAATTAGGACTCATGTGTTCAAATAATACACCATCTAAGAGAC  
CTAGCACGAGGCTAGTGGTGAAGACTTGAAGGGGAGGTGACACTCCCAGAGACGCT  
GGCAGCTCCCGGTGAATATGATGGAAAGAAGGGTGGTACTAGCGGTATGGAGTTAGAC  
GACTTCATAGATTCCTATCCGTCTTCGTCTTATTTTGAAGAAAGTAAGTACATGGTCATCAG  
CTTATGACGGTGAAGGCGATATTGATATTGAAGCTAATTCAGTAGCGCCATTAACGGATT  
CTGGAAGAGAGGACAACAGATAG

>Solyc10g084860.1.1 GenBank ID: KT232167

MFNFLTLLCFTITLSNLASSQLDEFIFTKFNQPNQNTLSGVAKISQNGFIQLTNDTSRLMGHAF  
YSSPFHFKPTTNASTFSFSTCFALAIVPEYPKLGGHGLAFTISPSKDFSTALPSQYLGLLNASD  
IGNFSNHIFAVEFDTVRFDFEFGDIDDNHVGININSLESNKSAAGYFINDQNSKQDLNLKSGKV  
ILVWVEYDSVTKLVNVTLSPNLKPPIPLLSYKFDVSSIFEENMYVGFSASTGLLASSHYILGW  
SFKLNGEAKLLDLSLPSLPGSKKSHGLITIIISIVFVFCALCSILIAFYIIQRFKNADVIEPWEVEI  
GPHRYSYRELKKGTRGFRESELLGRGGFGKVYKGVLRNSKGDIAVKRISHESKQGLREFVS  
EIASIGRLRHRNLVQLLGCRRRGDLLLLVYEFMPNGSLDNFLFDEPKMVLKWEQRFKIIKGV  
ASGLLYLHEGYEQVVVHRDVKASNVLLDGELNGKLGDFGLARLYEHGNSPSTTKVVGTLGY  
LAPELPRTRATTKTDVFAFGALLLEVVCGRRIEAKALPEELILVDWVWDKWNQDVI  
GLMCSNSKPLARPSIRQVVRYLEGEIGMPEAPSTQGSDDLEGFVGVESERWNSLASTSFMIK  
SSSFTCLSNNGDENSTNYVSFSTSPFPLLYSGECT

Solyc10g084860.1 GenBank ID: KT232167  
ATGTTCAATTTTCTCACATTACTCTGCTTTACCATAACCTTATCAAATCTTGCTTCATCTCA  
ACTTGATGAATTCATTTTACAAAATTTAATCAACCAAATCAGAACATAACCTTAAGTGG  
GTAGCAAAAATAAGCCAAAATGGGTTTATTCAATTAACAAATGACACAAGTAGACTAATG  
GGACATGCTTTTTACTCTTCACCTTTCCACTTCAAGCCTACTACTAATGCCTCTACCTTCT  
CTTTCTCAACGTGTTTCGCGTTGGCCATAGTCCCGAGTATCCAAAACCTCGGTGGCCAT  
GGCCTAGCATTACAATTTCTCCATCAAAGGACTTTAGTACCGCTCTTCCGAGTCAGTAC  
TTAGGTCTGCTCAATGCTAGTGATATTGGTAACTTCTCTAACCATAATTTTTGCTGTTGAAT  
TTGACACAGTACGTGATTTTGGTGGTATATTGATGATAACCATGTTGGTATTAATAT  
TAACAGCTTAGAGTCAAATAAATCAGCTGCAGCTGGATATTTTATTAACGATCAAATTCG  
AAACAAGATTTGAATCTTAAGAGTGGGAAAGTCATTCTTGTGGGTAGAATATGATTCTG  
TTACGAAGTTAGTTAATGTAACCTTTTACCTAATTTTGAACCAAAAATTCCTCTGTTA  
TCTTATAAATTTGATGTCTCTTCAATTTTGAAGAAAATATGTATGTTGGGTTCTCTGCTTC  
TACTGGTTTCTGCTAGTTTACATTACATTTTGGGTTGGAGTTTTAAGTTAAATGGAGAA  
GCAAAGTTACTTGGATTGATTACCTACCTCCTGATCTAAGAAGAGCCACAGAA  
GGACTAATTACCATCATCTCGATTATTGTGTTTGTGTTTCGCGTTATGTTCAATCTTGATTG  
CTTTTTATATAATCCAGAGATTCAAGAATGCTGACGTGATTGAGCCGTGGGAGGTTGAGA  
TTGGTCTCATAGATATTCGTATCGTGAACCTCAAGAAAGGTAAGAGGTTTTAGGGAGA  
GTGAACACTCGGGCGAGGTGGATTTGGGAAAGTTTACAAGGGTGTGTTTGGAGAAATTC  
AAAGGAGACATCGCTGTGAAACGGATTTCTCATGAATCTAAACAAGGGTTGAGGGAATTT  
GTGTCTGAGATTGCAAGCATTGGAAGACTTCGTCATAGGAATTTGGTTCAATTGTTAGGA  
TGGTGTAGACGTCGTGGTATTGTTGCTTGTGTATGAGTTTATGCCTAATGGAAGTTG  
GATAACTTCTGTTTGTGAGCCAAAATGGTGTGAAATGGGAACAAAGGTTCAAGATT  
ATCAAAGGGGTTGCTTCTGGTTTACTTTACTTACATGAAGGCTATGAACAAGTCGTGTA  
CATCGAGATGTTAAGGCTAGTAATGTGTTACTAGATGGTGAATTAATGGTAAGTTAGGG  
GATTTTGGACTTGCTAGATTGTATGAGCATGGTTCTAATCCGTCCACGACTAAAGTTGTA  
GGTACATTAGGGTACCTTGCACCAGAATTACCAAGAACAGGACGAGCCACTACAAAGAC  
TGATGTGTTTGCATTTGGTGTGTTTGTACTCGAGGTGTTTGTGGACGTAGGCCAATTGA  
ACACAAAGCAGGACCCGAGGAGTTTGTACTCGTGGATTTGGTGTGGGATAAATGGAGAG  
AAGGTAACATACTTGACATTGTGGACTAAAGATTGAAAGGCGAATACAATGTGATTGAAG  
TTTTGATGGTGTAAAATTGGGACTAATGTGCTCAAATAGCAAGCCATTGGCGCGACCAA  
GCATTAGGCAAGTTGTACGATACTTGGAAAGGTGAAATCGGGATGCCTGAGGCTCCATCA  
ACACAAGGTTCTGATGATCTTGAAGGATTTGGATTGTTGAAAGTGAACGTTGGAATCT  
TTAGCATCGACTAGTTTTATGATCAAGTCAAGTTTCAATTTACATGTTTGTCTAATGGAGATG  
AAAATAGTACTAATTATGTTTCTTTTCTACTTACCATTTCACCTTCTATATAGTGGTGAA  
TGCACCTAG

---

>Solyc09g011070.1.1 GenBank ID: KT232168  
MVYSCLVLLCSFISFSILASSQQLDGFIYTRFNEPNNNITLSGAAEISQNGFIQLTNETSRLMGH  
AFYSSPFQFKNSTNGSAFSFSTCFALAIVPEYPKLGGHGLAFTISQSNDFSTALPSQYLGLLN  
ATDVGNFNSNYILAVEFDTVQDFEFGDINDNHVGININSLRSNMSAKASYFDDDLVKQDLNLKC  
GKVLAWVDYDSVTNLVNVTLRSFAKKPKLPLFSYHIDLSPFLKENMYVGFSAAGLLASSHY  
VFGWSFKLNGEAKFLDLDLLPSLPGLKKKHSVIVIVVVLVIGILVAIYLVRFRKNADVIE  
SWELEVPHRYSYEELKQATRSFKDSELLGFGGFGKVYKVLQSSNMEIAVKRISHESKQG  
LREFVSEISSIGRLRHRNLVQLVGWCRRRGDLLLVDYDFMPNGSLDNFLFEKPRMLLTWEQRF  
KIIKGVASGLLYLHEGYEQVVHRDVKASNVLLDGELNGRLGDFGLARLYEHGSNPGRTRRV  
GTLGYLAPELPRTRATEKSDVFAFGALLLEVVCGRRPIDSKVGPPEELVLVDMVWNKWREG  
KILDVIDKRLKGEFNESEVVMVLKGLMCSNNEASSRPSMRQVMSYLEGEADIPDAPMAPGD  
YNGGFGFEENECMHSLASSRGHTSCLANGNVDGTFVSVSTAPLSCLFTDELPR

>Solyc09g011070.1.1 GenBank ID: KT232168  
ATGGTTTATAGTTGTCTTGTACTACTCTGTTCAATTCATTTCTTTTCAATCCTAGCTTCATC  
TCAGCAACTTGATGGCTTCATTTATACAAGATTCAATGAACCAAACAATAACATTACCTTA  
AGTGGAGCTGCTGAGATTAGCCAAAATGGATTCACTCAACTAACCAATGAACAAGTAGA  
TTAATGGGGCATGCTTTCTATTCTTACCTTTTCAAGTCAAGAACTCAACTAATGGCAGTG  
CTTTTTCAATTTCAACATGTTTTGCTCTTGTATAGTCCCTGAATATCCAAAACCTTGGTGG  
TCATGGACTTGCTTTTACTATTTCTCAGTCTAATGATTTTCAAGCAGCTCTTCCAAGTCAG  
TATCTTGGCTTACTAAATGCTACTGATGTTGGTAACTTCTCAAATTACATACTTGTCTGTTG  
AATTTGATACAGTACAAGATTTTGGTGGGATATTAATGATAATCATGTTGGTATAAA

CATTAATAGTTTAAAGGTCTAATATGTCTGCTAAAGCATCTTACTTTGATGATGATTTGGTA  
AAACAAGATCTGAATCTCAAATGTGGTAAAGTTATATTGGCATGGGTTGATTATGATTCTG  
TTACAAACTTTGGTTAATGTTACACTTTCAAGATTTGCTAAAAAACCAAAGTTGCCACTTTT  
CTCTTATCATATAGATCTCTCTCCATTTCTCAAAGAAAATATGTATGTTGGTTTTCTGCTT  
CAACTGGTTTGCTTGCAAGTTCACATTATGTTTTTGGTTGGAGCTTTAAGTTGAATGGCG  
AAGCGAAATTTCTAGACTTGGATTTACTTCCATCATTGCCTGGTCTCAAGAAGAAGCACA  
GTGGCGTAATTGTAGCTATCTCGGTTATAGTTGTTGTTTTGGTTTTGATTGGTATATTAGT  
TGCTATTTATTTAGTTAGGAGATTCAAGAATGCTGATGTTATAGAGTCTTGGGAGCTTGA  
GGTTGGTCCTCATAGATACTCTTATGAAGAACTTAAGCAAGCTACTAGAAGTTTTAAGGA  
TAGTGAGCTTCTTGGGTTTGGGGGATTTGGTAAAGTTTACAAGGGTGTTTTACAAAGTTC  
GAATATGGAAATAGCTGTGAAGCGTATTTACATGAATCTAAACAAGGCTTACGCGAATT  
TGTGTCTGAAATATCTAGCATTGGAAGACTCCGCCATAGGAATTTGGTTCAATTAGTAGG  
TTGGTGTAGACGTCGTGGTGACCTTTACTTGTGTATGATTTTTATGCCAAATGGAAGTTT  
GGACAATTTCTGTTTCGAAAAACCTAGAATGTTGTTGACATGGGAGCAAAGGTTCAAAT  
CATCAAAGGGGTTCTTCTGGTTTACTATACTACATGAAGGTTATGAACAAGTTGTGGT  
GCATCGAGACGTTAAGGCTAGTAATGTGCTACTAGATGGAGAGTTAAATGGCAGGCTTG  
GAGATTTTGGACTAGCAAGATTATATGAGCACGGATCAAACCCGGGCACGACTAGGGTG  
GTAGGCACATTGGGGTACCTTGCACCGGAATTACCAAGAACAGGACGAGCTACTGAAAA  
ATCCGATGTTTTTGCCTTTGGTGCCTTGTGCTTGAAGTGGTATGTGGACGTAGACCGAT  
TGATTCAAAGGTGGGGCCAGAGGAATTAGTTCTAGTAGACATGGTGTGGAACAAATGGA  
GAGAGGGGAAAATTCTTGATGTTATAGACAAGAGATTGAAAGGTGAGTTCAATGAAAGTG  
AAGTTGTGATGGTGTGAAATTAGGACTAATGTGTTCAAACAATGAGGCGTCGTCTCGAC  
CTAGCATGAGACAAGTGATGAGTTACTTGAAGGTGAAGCTGATATACCTGATGCTCCAA  
TGGCTCCTGGTGATTATAATGGAGGATTTGGATTCAAGAAAACGAATGTATGCATTCTT  
TAGCATCTTCAAGAGGACATACATCATGTTTGGCTAATGGAAATGTTGATGGTACATTTGT  
TTCTGTTTCTACTGCACCCTTTCATGTTTATTTACTGATGAGTTGCCTAGGTAG

---

>Solyc10g080510.1.1 GenBank ID: KT232169  
MYYLKISYLTNFVHLLIIFLVLVRLVDCLSFNQNFQKQENDFITTEHSYIEFGAIQVTGDARG  
TSISNLSGRIWYSQPMNLWNRKRNRTASFNSTFVINIKPESDPWGEGLAFILTKESGYESIPD  
ESYGQWLGIWNETTNGSSLNIFAVEFDTRKSYLDDLDDNHVGDINSINSVNVQVSLMDRGNV  
LSRAVDVIASVQYDGESNILKVYTFMSNETGVNERNPIISMPLDLSSYLPEDVVFVGFSASTGIY  
NQLNCIKAWNFTSTDIGNSNEVSLWLWILIPVISVLVFLGGVVFVFSWWRKKKRTQVLDQS  
ENIEIQINSATAPQRFQLKDLKRATGNFDPKNILGRGGCGVVLKGMMLDQKEVAVKRFFNDS  
SQGAKDLIAEVTTIGNLHHKLVKLIWGCYESNELLVVEFMPNGSLEKLIFCEENGKGLSLN  
WEIRYVICGIAQALDYLHNGCQKRVLRDIAKSNIMLDSELNARLGDFGLARTVQVNGKTH  
HSTKEIAGTIGYMAPESFHIGRATVETDVFAFGVLVLEVACGRKPGNRRYEENNYTNRVIEYV  
WDLYKIGRIIDAIDVRLDRDFNEEQAEVLLGLACHPNRYERPSMKTALQILTGELVLPDIPT  
EKPAFVWPAKAPSSNEASSDSLQEGQLTPITVLSGR

>Solyc10g080510.1.1 GenBank ID: KT232169  
ATGTATTATCTAGGCAAGATTAGTTATTTAACTAACTTTGTTTCATCTTTTATCATATTTAT  
ATTTTTGGTTCTTAGAGTGGATTGTCTGAGTTTCAATTACCAAATTTACCAAGCAAAC  
GAAAATGATTTCCATACTACTGAGCATTCTACATAGAATTTGGAGCTATCCAAGTAACTG  
GCGATGCTCGTGGTACTTCCATCAGTAATTTGTCTGGAAGGATATGGTATTCACAGCCTA  
TGAATCTATGGAACAGAAGGAAAAACAGAACAGCCTCGTTTAAATTCAACGTTTGTGATCA  
ATATCAAACCTGAGAGTGATCCATGGGGTGAAGGATTGGCTTTTATATTGACTAAAGAAA  
GTGGTTATGAGTCAATCCAGATGAAAGTTATGGACAATGGCTTGGGATTGTGAATGAAA  
CTACTAATGGATCTTCTTTAAACAACATATTTGCTGTTGAATTCGATACAAGGAAAAGTTA  
CCTTGATGATCTTGATGATAATCATGTTGGCATTGACATAAACAGCATCAACTCTGTCAAT  
CAGGTCTCGTTGATGGATCGTGGTGTAACTTTTACGAGCTGTTGATGTTATAGCAAGT  
GTCCAGTATGATGGAGAATCCAACATCTTGAAGGTCTATACATTCATGAGTAATGAACT  
GGAGTCAATGAAAGAAATCCCATCATTTCCATGCCACTTGATCTTTCTAGCTATCTCCCC  
GAGGATGTTTTCGTGGGATTTTTCAGCTTCAACTGGGATATATAATCAGCTTAACTGCATA  
AAGGCATGGAATTTTACAAGCACAGATATTGGGAACAGTAATGAAGTTAGCTTGTATGG  
TTGTGGATCTTGATACCAGTAATATCGGTTCTGGTTGTGTTCTTGGTGGGGTTTTCGTA  
TATTTTCACTGGTGGAGAAAAAAGAAGAGGACGCAAGTGTTAGATCAGTCGGAGAATAT  
AGAGATTGAGATTGAGAATTCAGCTACTGCACCTCAGAGATTCCAGCTGAAGGACTTGAA  
ACGAGCAACGGGGAACCTTGTCCGAAGAACATTTTGAAGAGGAGGATGTGGAGTAG  
TCCTCAAAGGGATGTTAGATCAAAAAGAGGTGGCTGTGAAGAGATTCTTTAATGATTCAA

GTCAAGGGGCAAAAGATCTCATAGCAGAAGTCACAACCTATAGGCAATCTCCATCATAAAA  
ACCTTGTCAAATTGATAGGATGGTGTCTATGAGAGCAATGAACTCCTTGTGGTCTATGAGT  
TCATGCCAAATGGGAGCTTAGAAAAGTTGATATTTTTGCGAAGAAAACGGAAAAGTTTTGA  
GTCTGAATTGGGAAATAAGGTATGGTGTCTGTGGGATTGCTCAAGCACTTGATTATC  
TGCACAATGGATGTCAAAAAGAGTACTTCACAGAGACATCAAAGCCAGCAACATCATGC  
TTGACTCAGAACTCAATGCTCGTCTAGGAGATTTCCGGATTAGCTAGGACAGTTCAAGTGA  
ATGGAAGACTCACCATTCAACAAAAGAGATTGCTGGTACTATAGGCTATATGGCACCTG  
AGAGTTTCCATATAGGTCGAGCCACAGTTGAAACAGACGTCTTTGCATTTGGAGTGCTAG  
TTCTTGAAGTTGCTTGTGGTCGAAAACCTGGAATAGACGATATGAGGAGAATAATTATA  
CCAACAGAGTCATTGAATATGTATGGGACTTGTACAAGATTGGAAGGATCATTGATGCCA  
TAGATGTCAAGATTGGATAGAGATTTCAATGAAGAACAAGCCGAATGTGTGTTAATATTAG  
GTTTGGCTTGTGCCATCCAAATCCTTACGAAAGGCCAAGCATGAAAACCTGCTTTACAGA  
TTCTTACAGGGGAATTAGTTCTACCAGACATCCCAACTGAGAAAACCTGCATTTGTATGGC  
CAGCCAAAGCTCCATCGTCCAACGAAGCTTCTAGTGATTCTCTCCAGGAAGGCCAACTT  
ACACCGATTACAGTACTCAGTGGCAGATGA

---

>Solyc02g068300.2.1 GenBank ID: KT232170

MGLLTPTTLTIFIMLFSLLQLKLQAQKMEHLNLKYASFDETFDIFEVEKPATISNAALQVTPDS  
ASSDFNRYNNSGRILFKQPFKLWDGDVFDNTRVASFNSSFLVNIYRPNNETAEGFLAFLISP  
DLEKPDNSQGGYLLGLTNGSTDGISSNKVVAVELDTSKQSFDPDDNHIGIDVHSVRSVKVESL  
TPHGIELAPIGARFYNVWVQYDGIKKVLDVYIVEQALKNGSTPPIPKTPILTYDLDLKEHVNQE  
SYFGFSASTGTNYQLNCVLRWNLVVEYFPEKKNPWLKIVLGVGIPVVSLLILGAACLGICYHK  
KRIDRSQSNILGALKSLPGTPQEFQFKALKKATNNFDEKNKLGQGGYGVYRGLAGEENKD  
IAVKWFSRESIKGQDDFLAELTIINRLRHKHLVKLLGWCHKNGKLLLVEYMPNGSLDMHLFA  
GPDKEPLSWHVRYKIVQGVASALHYLHNEYEQRVVHRDLKASNIMLDSKFNARLGDGFLAR  
ALDNERTSYAEAEGVLGTMGYIAPECFHTGKATQQSDVYAFGAVLLEVVCGRPGTKINGF  
QFFVDWVWYLHRDGRILEAVDPRLGDDYVADEAKLLLLGLACAHPIATDRPKTQAIQIISG  
SAPAPEVPPFKPAFVWPSMVPIDIDSSVMDTTSITTSHFNSGWSLDYQSRETPTYADHSLV

>Solyc02g068300.2.1 GenBank ID: KT232170

ATGGGGTTGTTAACACCAACAACACTCACCATTTTCATCATGCTCTTCTCTTTACTTCAAC  
TCAAGCTTCAAGCTCAGAAAATGGAACATCTCAACTTAAAATATGCATCTTTTGATGAAAC  
TTTCTTTGACATCTTTGAAGTTGAAAAGCCTGCAACAATTAGTAACGCTGCTCTTCAAGTA  
ACCCCTGATTCTGCTTCTCAGATTTCAATCGCTACAATAACTCAGGAAGAATCCTCTTTA  
AGCAACCATTTAAGCTCTGGGATGGTGATGTTTTCGACAATAACAAGGGTTGCATCTT  
TCAACTCTTCTTTTCTGTCAATATTTACAGACCAAATAATGAAACAGCTGCCGAAGGGTT  
AGCATTCTGATTTACCAGATTTGGAGAAGCCAGATAATAGCCAGGGCCAGTATTTAGG  
GTTAACAAATGGTTCTACAGATGGGATTTCTAGTAACAAAGTTGTTGCTGTTGAGCTTGAT  
ACTTCTAAACAAAGCTTTGACCCTGATGATAATCATATAGGTATTGATGTTTCATAGTGTTA  
GATCTGTAAAGGTCGAATCTTTAACACCCCATGGTATAGAAGTTGCTCCTATTGGTGCAA  
GATTCTATAATGTTTGGGTACAGTATGATGGAATCAAGAAAGTTCTTGATGTTTATATTGT  
TGAACAAGCACTGAAAAATGGGTCTACCCACCTATACCAAAAACCCCATTTTAAACATA  
TGATCTTGATTTGAAAGAACATGTAAATCAAGAATCATATTTGGGTTTTCTGCATCAACT  
GGGACTAACTACCAACTCAACTGCGTATTGAGATGGAACCTAACAGTTGAGTATTTCCCT  
GAAAAGAAAAATCCTTGGTTGAAGATTGTTTTAGGTGTTGGGATTCCTGTAGTGTCTCTTT  
TGATTCTTGGCGCGCGTGTGTTAGGGTATTGTTATCATAAGAAAAGGATTGATAGGTCAC  
AGTCTAACATATTGGGTGCACTCAAGAGTTTGCCTGGAACCTCCACAAGAGTTTCAGTTCA  
AGGCTTTGAAGAAAGCTACAAACAATTTTGTGAAAAGAATAAGCTTGGGCAAGGAGGAT  
ATGGAGTTGTTTACAGAGGATTTTGTAGCTGGTGAGGAGAACAAGATATTGCTGTCAAAT  
GGTTTTCTAGGGAAAGCATCAAAGGGCAAGATGATTTCTTGGCTGAGCTTACTATTATCA  
ATCGTCTTCGACATAAACATCTTGTCAAATTGCTTGGTAAGTGTTCTTAGTTTTTCTTCAA  
CATAGATTTTGTGCATTTGTTGAGTAGAGTATTAGAGTTATATTGTGCATGTTTTGTTTAT  
GATCTTTAATAACGTTAGGGAAATGGTACTGATAACTGATAAAGTTGATGTCATGTGATCC  
AAAGTTATTAAGACTCTTGTGATCCAATCTTCTCAGTATAACTACAAGTTTTGAGTCTCA  
AATAAGGCCTTATCTCCAATATTTCAATTGAAAATTAACAATAGGGTAAAGATTAGTTTT  
TTTTGAGTATGTACATGAAATATGTGAATAACCTTTAAGGCAAAGGAAGTTTCAAATGTAG  
GGTAAATTTTGTCAAATTAGTTGCATTTTCTTGAATTCAGCAATCAGAAATAGAAATTG  
TCCTCTTATGTTTTTGTATTCTCAATGAAAGAGAGAATTTATTACCAGGATTCATTGATGT  
GACTTGAATAATGGTGCCAAAACCTTGTAAAAGTTGCTGACAATTTAAAGCCAAAGATT  
GGTGGGACATCAAATTAATACTCCTTTTGTTCAAATTTATATGGCTTTTTTCTTCTTCT

TTTTTTATTATAAAAAAGAATGATTTTTTACCTTTTTTATTTCAAACCTCCATCTTTTCAACTTT  
ATACGTAATATGTTTAAAGAGACTAATATTATAGAATATTTGTATTTGACATATTTTTTTACT  
TTAAAATCATAAAAATCTAAAATTCTCTTTATATCTTAAACTTCGTGTAATCGACATATAA  
ATTGAAACGGAAGGAATTTATGTGATCTGTTTTTCAGACTCTCCAGCAGTGTTGTTGCAC  
ATGCATTGGATTCTTTTTAGAAAAAATACTTTTTTTTTAAGGATCTGATATGTATTCATCG  
ACATTTTTAGAGAGTGAGCAACACTATTACAATAGACTCATTAAATGCATGAGGACATGC  
CCTTATCTTTTTATGCTTTTCTTTTCTAGTAACTACTAGTAAGTGATCCATGATCTTACAT  
GCTTCTTCAACTAATTTGTGTAATTTGGCATGGTACTAGTCTTTCTAGTCTGACATTTAG  
CATGCTAGGAATTTACTAAGTTGGATCATCTTCTGACAAGCAAATTTCTCTTTGAAGAA  
TCAAAGTTTTCTGAACATTTATAAATACTTGGTCTCTTTTTGTCTTCAATCTCCTTTTC  
CATTCTTAGAATTTCAAGTCATCCCAAGGATTTGTCTAAGTTTTTGTACCTGACTAACT  
AGATTTGCGTGCATAGGGTCTATCAAAGTGAGAAACACAATATATCAAGAGTGTCTCCA  
ATTTTTTTAATGTTTGAAGTCGAAACCTCTAGTTAATGAACCACACTCTACTACAGTAAAT  
GTTTAATAGTTGATGGTACGTAAGAGTTCAAGCCAAAAATATCAAGGAAGTTAGAAAAA  
CTAATGGAATGCCTTAAAAGTTTTGACCAAGAACCAACTTGTGCTATGGTCCCTCCAATT  
TAGAAGAACAAGGCACATCTTGAAGTGCTTCATTTTGATTTGCTTAAAAGAAGATGATCA  
TCCTTTGTTGACCATGGAATAAAGCAGCCATTCGTCAAAGTTCAATACAATTTTTTTATGT  
CAAAATTTTGGAAGCTTCTTCTTGTCTAACATCCCTTTTCATTATTGTCAATGATTAAC  
ACAAGTTTTGGATGTTAGTTGAATGATGATAAATTAATCCAATGAAAAGGACATTAATTC  
TGTATTTTAGTACATTCATATCTTCAAACACCTAATCTTTGTGTCACCTACTCTTGTGAT  
CTGGCCCTACAAAGAGATAAGGTTTGTAAAATACAACAAAAAGTTGACAATTTGGGTAGT  
GTGCAACTTCTGTATCTAGTTATTTTTACTGATTAAAAAACAAACATAAGCATCTTACAAGA  
TTGCATGTTATGGTGACAGGATGGTGTACAAGAATGGAAAGCTACTGCTTGTATATGAA  
TACATGCCTAATGGCAGTCTAGATATGCACCTCTTTGCGGGCCCAGATAAAGAGCCGCT  
GAGCTGGCACGTCCGCTACAAGATTGTGCAAGGTGTGGCCTCAGCATTACATTATCTGC  
ACAATGAGTATGAGCAGAGGGTGGTCCATCGCGACCTGAAGGCGAGTAACATCATGCTT  
GACTCAAAGTTCAATGCGCGCCTTGGGGACTTTGGCCTTGCGCGAGCATTGACAACGA  
AAGGACCTCGTATGCTGAGGCAGAAGGAGTGCTTGGTACAATGGGATACATTGCACCAG  
AGTGTTCACACAGGGAAAGCCACACAGCAATCTGATGTGTACGCGTTTGGGGCAGTG  
TTATTGGAAGTTGTATGTGGCCAGAGACCTGGAACCAAGATTAATGGCTTTCAATTCCTT  
GTTGATTGGGTTTGGTACTTGCACCGCGATGGCCGTATCTTGGAAAGCTGTTGATCCAAG  
GCTTGGAGATGACTATGTTGCTGATGAAGCAAAGAACTTTACTACTTGGTTTGGCTTG  
TGCACATCCTATAGCTACTGACAGGCCTAAAACACAGGCAATAGTTCAGATTATATCAGG  
GTCAGCACCAGCACCAGAAGTTCCACCATTCAAGCCAGCATTGTGTGGCCATCAATGG  
TGCCAATTGACATAGACTCAAGTGTATGGACACAACATCCATTACTACTTCTCACTTCAA  
TTCAGGATGGAGTCTAGACTATCAAAGCAGGGAGACCCCAACATATGCAGATCACTCTTT  
GGTGTAG

---

>Solyc03g031980.2.1 GenBank ID: KT232171  
MEFFAPKIFIFFSCLQLISQAKIITFDKQYGDPPFDHTYAPLLEIKYPAQISNQALQITPDTASTAY  
KTLNNSGRILLKRPFLWVDDISRTASFNTSFLVNIYRPDNKTGAEGLAFLICPNLPLNSQG  
QYLGLTNATTNGAPSNKIIAIELDTFKQEFDIDDNHVGDIDNNVESVESKSLTPYGIELAPIGARF  
YNIWIQYDGIKKILDVYIIEQMTKNGATPTRPKVPILTHNVDLKEVVNEDSYFGFSASTGHFKQ  
LNCVLRWNLVVEYFQEKNNQEKVLITSVSVGVLLIVLLILSGYFGYFFNEKKRGDDRSES  
TILGALKSLPGMPRDFEFKELKEATNDFDEKNKLGEGGFGVYKGYLVGEKLEIAVKWFSRE  
SIKQDDFLAELTIINRLRHKHLVKLLGWSHRHGKLLLVEYMPNGSLDKHLFSSGQPLRWS  
VRYNIVSGVASALHYLHNEYEQKVHRDLKANNIMLDSNFNARLGDFGLARAIIDNEKTSYAD  
EGEVLGTMGYIAPECFHTGKATQHSVDVYAFGAVLLELICGQRPQTKVNGFQLYLDWVWFL  
HRDGRILEAVDTRLGDQYVVEEAERLLLLALACSHPIANQRPKTQTIVQVISGSVPPPQVPPF  
KPSFVWPSMVPMDIDSSSIVDTISITTPQYSENNSIEYQTNLSI

>Solyc03g031980.2.1 GenBank ID: KT232171  
ATGGAATTTTTCGCACCAAAAATCTTCATATTTTTCTCTTGTCTTCAACTCATATCACAAGC  
CAAAATCATAACATTTGACAAACAATATGGTGATCCTTTTGACCACACATATGCTCCTTTA  
CTTGAATCAAATATCCTGCACAAATAAGCAATCAAGCACTTCAAATCACCCCTGACACA  
GCTTCCACTGCTTACAAAACGTTAAATAATTCAGGCAGAATCCTACTAAAACGACCTTTCA  
AATTATGGGTAGACGATATTTCAAGGACAGCGTCTTTCAACACGTCAATCCTGGTAAACA  
TTTATAGACCGGACAACAAAACAGGAGCCGAAGGTCTAGCATTCTTGATATGTCAAAT  
TGGATTTGCCACTAACAGCCAGGGTCACTTGGGCCTAACGAACGCTACAACAAAT





TCCATTTCCGGCATTGGAAGAGCTTTCTACACATACCCAGTTCGTTTTCTTGATTCTTTA  
ACCAATAACACTGCTTCTTTCTTGTACTTTCTCTTTACTATACTTCCAACCCCTTCTTG  
CCTTTTGGTGATGGCATGGCGTTTTTGGTCACTTCTGATGTTGATTCTTTGAGCATCTCT  
GATGGGTACATGGGTCTTCCGAATCCCGACTCGGAAGATTGTTCTTGGCTGTGGAATT  
CAACGCCAATGATAACCGTATTGGTGTGATACTAAAGAAATTAGGTCATTGGCTTCTGC  
TAGTGTGATTGAGCTGGGATTGATTTGAAAAGTGGGAAAGAAATGGCGGGTCCGATTG  
AGTATAAAGATTGAGAGAAGATAATCAGAGTTTGGATTGGGTATGAACTGCAAATTAGGC  
CTCCTAATCCTGTTCTTTCTACCAGAATTGATGTTTCCAATCAGTTGAATGAGTTTATGAG  
GATTGGTTTCACTGCTAAAGGGTCTGCAGTTTATAGCATTAGTCGTTGGCGATTTAGAAC  
GTTTGGATTGATTTGCTCTCCAATATCATCGTCTTGGGATCAATCCGATGAAGGAACTG  
TTTGATGTGTTTCCCTGAGGAGGAAATTGGTGGGCATATTTCTGATTCTCATCATAGCAG  
TAGTACTAGTAGTAAAAGCTTACTGAAATTGACTTATGGAGGGTTAGCTGCAATTGTCAC  
ACTTGTGGTTGTGCTTTGTCTGTTGTGTTTGTCTTGCCTTGAAGAAGGAAAAACCGCA  
TAGAGTAGGGAGAACAAGGAACGGCAAATGTGTAGATTACAAGGAAATAGAGTGCCTC  
AAGATTGTCATTATCTGAAATAAAATCAGCAACAGAATGTTTTAATCATGAAAGGATAAT  
TGGAGAAGGAGCATCTGCTGTTGTGTATGAAGGGGAAATTCCTTCTAGGGGATCTGTGG  
CTGTTAAGAGATTTGTCCATGGGAGTAGATTGGGTCTTCCATATTCCTTTAATACTGA  
ATTTGCTTCTATGGTTGGCTGTTTAAAGACACAAGAATTTGATTCAGCTTCAAGGGTGGT  
TTGTGAGAGGAATGAATTGGTGTAGTGTATGAATTCATGCCTAATGGTAGCCTTGACAA  
AATCCTCCACGAGCGATCGCATTTAACTAAGTTTCTGACATGGGAGAGAAGACTGAACAT  
AGTTATTGGTGTGTCATCTGCACTTATGTATCTTCATGATGAGTGTGAGAATCATATAATT  
CACAGAGATGTGAAGAGTTGCAATATAATGCTTGATGCTGAGTTTAAATGCAAAGCTTGA  
GATTTCCGTTTAGCAGAAGTGTGATAATTCTAAGACAAGGGATGCTACTGTACCAGCT  
GGAACAATGGGATATTTTGCACCTGAGTATGTGTATACTGGTATTCCAACCTGTTAAAACA  
GATGTGTATAGCTTTGGTGTGATGACTGGAAGTGGCATCAGGTAGAAAGCCTATCGA  
CGAAGGTGGTGGTTTGATTACTGATTGGGTGTGGGACATGTGGGAGAAAGGGAGGATA  
ACTGAGGCTGCTGATCCTAAACTAATGGGGCGGTTTCAGAAGAACCAGATGGATAGAAT  
GCTGATCGTGGGACTTTCTTGTGTGCATCCCGATCATGAGAAGAGACCGCGAATGAGAG  
ATGTTTTCCGTATGCTTAAAGATGAAGCTCCACTTCTCATTTTACCTCCAATGAAGCCCAC  
TGTGAGACTTCAATCTATTTTACCAGAGAGCTGTGAAGAAATCATGAATTGGGCTGCAAG  
AATGGAGGATACACCATGGTCTACTCCAAGAACTCATTTTAGCAAGAAGACTAG

---

>Solyc07g065610.1.1 GenBank ID: KT232173  
MFVSIFRFLIFFSFLSLVSSQNCSEFDLQSFTRLNFTLLGDSYLRNGVVGLTRDLQVPSSSSGS  
LIYNNPISFFDPETKKTASFSTRFAFSVTNINPSSFGDGLAFFLSPDNQTLGSPGGFLGLVNSS  
QLTKNKFVAVEFDTKQDLHFNDPDDNHVGLDIDSLISIKTANLRLAGVDLKSRLNISCWIDYKS  
QEKKLMVFLSYSLKPKKPIVLDIDLSDYIKEFMYVGFVAASTEGSTELHSIENWSFRTYGFGP  
VRPPHNVDNTVIVKPPHQQDSGGHKKHNSFGLGFGGPAFFCAVLVAFGWISVKKWRGL  
NTEKNLKAELVTGPRQFSYKELRSATRGFHSSRIINGAFGTVYKAFFMESSIAAVKRSKHS  
HESKTEFGAELSIIACLRHKNLVQLQGWCIEKGELLLVYDYPNGSLDKVLYQESEHGNPLK  
WPYRYNIAVGLASVLTYLHQECEQQVIHRDIKASNIMLDASYNARLGDFFLARLMDHDKSPV  
STLTAGTMGYLAPEYLQYGKATEKTDVFSYGVVILEVACGRRPIEGEGTGHEMNLVDWVW  
RLYSEGRIIDAADKRLNEDFKEEEMKLLLVGLSCANPDSTERPCMRRVFQILNNEAEPIFVP  
KVKPTLTFSTSIPFNIDDIFSDSEGSEAPEHELEIRID

>Solyc07g065610.1.1 GenBank ID: KT232173  
ATGTTTGTTCATTTTTCAGATTTTTCAGATTTTCTTTCAGATTTCTTGTCCATTAGTATCATCACAA  
AATTGCAGCTTTGATTTGCAATCTTTTACACTTCGCAATTTCACTCTTCTTGGTATTCTTA  
TCTACGTAATGGTGTGTTGGTCTAACTAGAGATCTTCAAGTTCCATCTTCAAGCTCTGGT  
TCCCTCATTTACAATAACCCCATCTCGTTTTTTCGATCCAGAAACCAAGAAAACGGCGTCT  
TTTTCAACAAGATTTGCTTTTTCTGTTACTAACATCAACCCCTCTTCATTTGGTGATGGATT  
GGCTTTTTTCTGTACCTGATAATCAGACATTGGGTAGTCCAGGTGGGTTTTTGGGTTT  
GGTGAATTCCTCACAGTTAACTAAGAATAAGTTTGTGCTGTTGAATTTGATACTAAACAA  
GATTTGCATTTTAAATGATCCTGATGATAATCATGTTGGTCTTGTATTTGATAGTCTTATTTT  
AATAAAGACTGCAATTTGAGGTTAGCTGGTGTAGATTTGAAAAGTAGGAATTTGATTAGT  
TGTTGGATTGATTACAAGAGTCAGGAGAAGAAGTTGATGGTTTTCTTGGATTACTATAGTT  
TAAAGCCTAAAAACCAATCTTGATTGTTGATATTGACTTGTCTGATTATATAAAAGAGTTT  
ATGTATGTGGGGTTTGTGCTTCTACTGAGGGGAGTACTGAATTGCATAGTATTGAGAAT  
TGGAGTTTTCGAATTTATGGATTTGGCCCTGTGAGGCCTCCTCACAATGTTTCTGATAAT  
ACCGTGATTGTAAGCCTCCGATTATTCAAGATTCTGGTGGCCATAAACATCATAATAAG

AGTTTTGGGTTGGGTTTTGGAATTGGTGGTCCAGCTTTCTTTTGTGCTGTTCTTGTAGCC  
TTTGGTTGGATTCTGTAAAGAAATGGAGGGTCTTAACACAGAGAAGAATTTGAAAGCC  
GAGCTTGTTACTGGACCGAGGCAGTTCAGTTACAAGGAGCTGAGGTCAGCTACAAGAGG  
ATTTTCATTCCAGCAGGATTATAGGAAATGGGGCTTTTGGTACTGTTTACAAGGCGTTTTT  
CATGGAATCGAGCTCTATTGCTGCAGTAAAAGATCTAAGCACAGCCATGAAAGTAAGA  
CTGAGTTTGGCGCTGAGTTGTCGATCATAGCATGTTTAAAGGCACAAAATTTAGTTTCAGC  
TGCAAGGGTGGTGTATTGAGAAGGGAGAGTACTTCTTGTATGACTATATGCCTAATG  
GGAGTCTTGATAAGGTGCTATACCAGGAATCCGAGCATGGGAATCCGCTGAAATGGCCT  
TACAGGTACAATATAGCAGTTGGTTTGGCGTCTGTTCTGACTTATTTGCATCAAGAATGT  
GAGCAGCAGGTAATTCACAGAGACATAAAAGCAAGCAATATTATGCTTGATGCAAGCTAC  
AATGCGAGGCTTGGCGATTTTGGGCTGGCAAGACTTATGGATCATGACAAGAGTCCAGT  
CTCAACTTACTGCTGGAACAATGGGATACCTTGCTCCTGAGTACCTTCAATACGGAAA  
AGCAACCGAGAAGACTGATGTTTTAGCTACGGTGTGGTTATACTAGAGGTGGCTTGGC  
GGAGGACCAATTGAAGGAGAAGGTACTGGTCATGAAATGGTGAATTTGGTTGATTGG  
GTTTGGAGACTTACTCTGAAGGTAGGATTATCGATGCAGCAGACAAGAGGCTTAACGA  
AGACTTCAAAGAGGAAGAGATGAAAAAGTTGCTACTTGTGGACTGAGCTGTGCAAATCC  
TGATAGCACAGAAAGGCCTTGTATGAGGAGAGTATTTTCAGATACTCAACAATGAGGCGG  
AACCTATCTTTGTTCCGAAAGTGAAACCAACTCTAACTTTCTCCACTAGCATCCCGTTCAA  
CATTGATGACATTTTCTCAGACAGTGAAGGGAGTGAGGCACCAGAACATGAGCTCGAAA  
TCAGAATAGATTGA

---

>Solyc03g080060.1.1

MDGPSINVTKHISFRDFSSINPRLKQDLTLVGSVIVSDEKKSQIPDPEREGDDLKHLVGRAIY  
SSPIRLFDPQTQTPASFETTFQFEVKS YEASDQKGKVVGGSGLTFIIVPDELTVGRAGPWL  
MLNDLCDEYKTVAEFDTRKNPEFGDPNDNHLGINLGSIVSTAAINASDAGVQLNDGVS  
VHRVWISYDGRKRFVEIRLAPDGRGYPSKPVYSGLLDLSPYLNEYMFVGFSAATGNHTQI  
HNILSWNFTSISQASLRIPSTETCQNKIMLQNSTQSENDHRKTPNSFFIFLAVVILLVIV  
LINLYFSSYKRDSNSDEAFPLPEKKQRPRPPNKARRFTIAEISIATRNFSELQILGSDEK  
SITYKATILNGCNVVKRFLTQFFNTHGFEKRQFHKEIKAITRIRHPNLVPIRGWCYDNQET  
IVVYDFIPNGSLDKWLVFGVGVLPWTRRFKVLKDLADSLVYLHSLKQLAHKNVKS  
SSVFLDVSFRAVVGDFGFVLTSAAGSTRFEAMVSQTADVFEFGVVLEIIAGRSRKS  
SNPGERDLLDLAWAMHEVQQKETLVDRRMGAVVNLEQAIRALDIGLLCTLNENKGRPT  
MEEVVEFLNMEKPIPELPSGRPVCLFPYSSTTGLCSGYACTTFK

>Solyc03g080060.1.1 Corrected; GenBank ID: KT232174

MDCFFWFFFSFAILVNSYLGSSMDGPSINVTKHISFRDFSSINPRLKQDLTLVGSVIVSDEKKS  
VQIPDPEREGDDLKHLVGRAIYSSPIRLFDPQTQTPASFETTFQFEVKS YEASDQKGKVV  
GGSGLTFIIVPDELTVGRAGPWLMLNDLCDEYKTVAEFDTRKNPEFGDPNDNHLGINLGS  
IVSTAAINASDAGVQLNDGVSVHRVWISYDGRKRFVEIRLAPDGRGYPSKPVYSGLLDL  
SPYLN EYMFVGFSAATGNHTQIHNILSWNFTSISQASLRIPSTETCQNKIMLQNSTQ  
SENDHRKTPNSFFIFLAVVILLVIVLINLYFSSYKRDSNSDEAFPLPEKKQRPRPPNK  
ARRFTIAEISIATRNFSELQILGSDEKSITYKATILNGCNVVKRFLTQFFNTHGFEKRQ  
FHKEIKAITRIRHPNLVPIRGWCYDNQETIVVYDFIPNGSLDKWLVFGVGVLPWTRRF  
KVLKDLADSLVYLHSLKQLAHKNVKS  
SSVFLDVSFRAVVGDFGFVLTSAAGSTRFEAMVSQTADVFEFGVVLEIIAGRSRKS  
SNPGERDLLDLAWAMHEVQQKETLVDRRMGAVVNLEQAIRALDIGLLCTLNENKGRPT  
MEEVVEFLNMEKPIPELPSGRPVCLFPYSSTTGLCSGYACTTFK

>Solyc03g080060.1.1 Corrected; GenBank ID: KT232174

ATGGATTGTTTTCTGGTTTTCTTTTCTTTGCCATATTAGTTAATAGTTATTTAGGTT  
GTCCATGGACGGACCTTCAATTAATGTGACGAAGCATATCTTTTTCGAGATTTAGTT  
TATTAATCCGAGATTGAAGCAAGATCTTACACTTGTGGTAGTGTTATCGTCTCGGATGA  
AAAAAATCCGTTCAAATCCTGATCCTGAGCGAGAAGGTGATGATCTAAAGCATCTAGT  
AGGACGAGCTATATATTCTTACCTATCCGTTTGTGGATCCTCAGACTCAAACACCGGC  
TTCTTTTGAACGACTTTCTCGTTTCAATTTGAAGTGAAGTCTTATTCAGGCAATGAGGCG  
TCAGATCAGGGGAAATATGTAGGTGGTAGTGGTCTTACTTTTATAATCGTCCCGGATGAA  
TTAACTGTTGGCCGTGCTGGTCCGTGGCTTGGGATGCTGAACGATTTGTGCGATGAGGA  
TTATAAACAGTAGCTATTGAGTTTGATACACGGAAGAACCCTGAATTTGGTGACCCAAA  
TGATAATCACTTGGGCATTAATTTGGGTAGCATAGTTTCAACTGCAGCGATTAATGCTTCT  
GACGCTGGAGTTCAATTGAATGACGGATCAGTTCACAGAGTTTGGATATCTTACGATGG  
CGGAAAGCGATTTGTTGAAATTCGTCTTGCACCTGATGGCAGAGGATATCCTTCTAAACC

AGTTTACTCTGGTTTACTTGATCTTTACCTTACTTGAATGAGTATATGTTTGTGGATTTT  
CAGCTGCTACTGGAAACCATACACAAATCCACAACATTTTGTTCATGGAATTTACCTCAAT  
TAGTCAAGCTTCGCTTCGAATTCCTTCAACAGAGACATGCCAGAACAAAATCATGCTTCA  
AAATAGCACACAATCTGAAAATGATCATCGGAAAACGCCTAATAGTTTCTTTATTTTCTT  
GCTGTTGTCATTCTTCTGGTAATCGTTCTTATTAACCTCTATTTTCAGTAGCTACAAGCGAG  
ATAGCAATTCTGACGAAGCATTCCCTCTGCCTGAGAAAAAGCAGAGACCACGGCCACCA  
AACAAAGGCACGCCGCTTCACAATAGCTGAGATCTCCATCGCAACAAGGAATTTTCAGCGA  
GTTACAAATATTAGGCAGTGATGAGAAGAGCATTACGTATAAGGCCACGATACTAAACGG  
GTGCAACGTTGTTGTAAAACGATTTTAACTCAATTTTCAACACACACGGGTTTGAAAAG  
CGTCAATTTACAAGGAAATCAAGGCTATCACCAGAATTCGTCACCCGAATTTGGTCCCG  
ATTAGAGGTTGGTGCTATGACAACCAAGAAACAATAGTTGTGTACGATTTTCATCCCAAAT  
GGAAGCCTCGATAAGTGGCTGTTTGGCGTTGGCGTCTTGCCTTGGACGAGGCGTTTTAA  
GGTCCTTAAAGATTTAGCAGATTCTTGTCTACCTTCATTCAAAGCAACTCGCTCACAAA  
AACGTTAAAAGTAGCAGTGTGTTTCTTGACGTGAGCTTCAGAGCAGTAGTTGGTGATTTT  
GGTTTTGTGCTTACTTCAGCCGGGTCAACCCGGTTTGAGGCCATGGTGAGTCAGACAGC  
TGATGTGTTTCGAGTTTCGGAGTAGTCGTGCTTGAGATCATTGCGGGTTCGGAGCAGGAAGT  
CCAACCCGGGAGAACGGGACTTATTGGATCTTGCATGGGCAATGCATGAGGTACAACAG  
AAGGAAACTCTAGTGGATCGTAGAATGGGCGCGGTCGTGAACCTGGAGCAGGCGATT  
GGGCATTGGATATCGGGTTGCTCTGTACGTTGAACGAGAACAAGGAAGGCCTACTATG  
GAAGAAGTGGTGGAGTTCCTAAACATGGAGAAACCGATACCAGAGTTGCCATCGGGTCG  
ACCCGTTTGTGTTCCCGTACAGCAGCACACAGGCTTATGCAGCGGGTACGCTTGTA  
CAACATTCAAATGA
