# Supplementary material for: L-type lectin receptor kinases in Nicotiana benthamiana and tomato and their role in Phytophthora resistance
Source: PubMed Central journal article supplement (PMC4623685; doi:10.1093/jxb/erv379), 2015-08-05
Supplement: supp_erv379_Supplementary_File_S2.pdf [file supp_erv379_Supplementary_File_S2.pdf]

**Supplementary File S2.** DNA sequences of the fragments used for TRV-mediated silencing in *N. benthamiana* and tomato.

>TRV:*NbVIII.2*/TRV:*SlVIII.2*

gaattcggcattatttgaatcaagaatgattctaccttggtacatagggagaaaatgtgtaggtgtgcttcagccttggcatatttacatcaaga  
atgtgaaaatcaggtgattcatagggatataaagagtagtaacattatgtagatgaaggggtcaatgcaagattaggtgatttggattagcaag  
acaagttgaacatgacaagtccccgatgcaacggtagcagccgggacaatgggctactggctcctgaataactgttaaccggaagagcaa  
ccgaaaaactgatgttttagctatggagcagttgttctgaagtggcaagtggaggagccaattgagagggaaacaacaagagttgaga  
aagttggagtgaatagtaacttagtcccggg

>TRV:*NbIX*

gaattccgattcaagtttaagtcaagctcgggtgatttggcttagctagactaatggaccatgaattaggtcctcagactacaggggtggctggaa  
ctttaggttatttggctcctgaatacataaaaacagggccgagcaagtaaagagtcagacgtatacagcttcggaatagttgcacaagaaattgc  
aacccgaagaaaatcagttgatccggggacggggaaatctgatgcagtgtagtgagtagtgttggagcfttataaaggacaactcttctg  
ctgttgatgagaaattaaacctgattttgacgcgaaacaagtagagcgattgatggctaccaggttatggtgtgctcatccggagagcaactg  
aggccatctataagacaagcaattcccggg

>TRV:*SlIX.1*

ggatccgacatggattactfacaatgctacaacaataatcttagtgcatttggaaactatggaacaggtccgaattcgagcatgtttacataata  
aacctcagagatgttctgcctccgtgggtcacaattggattctctgctgcaacaggactaaatgtcgagagacatacactgaaatcgtgggaattc  
agctcgagcttgttataacagagttaggtggaaatgatcgcaaaagattggacttattgcagggctaacaacattaggtgggattttagtagta  
gcgcgatttggctttagatgtttgaggaaacgtagacgaaaggtgaagggaatccagagacaataagcttaacatcttcaatgatgatctg  
aaaagggggcaggaccaagaccggg

>TRV:*NbX*

gaattcatggaagtctgaataaatggatatttgataagccagagaaggttatgaattggctagacaggaggaaggtcctaactgatgttgctgag  
ggtttaaactatttacatcatggttgggaacaagtgtgttacatagggatattaaatctagcaatgtctttagattgtgaaatgagagggagact  
gggagatttcgggctagcaaagttatacactcacgggtgtgtaccaatacaactagggtagtaggtacattaggtacttggcacctgaagttg  
tgacaagggtacaccaactgcagctagtgaccggg

>TRV:*NbXIII*

gaattctgtatatggtggcttagctgcagttgtacactgtgtgtgtattctggctattgtgtctgtttgtgtaaggagaaaaaaagggatgga  
gtagaggggaaaatgaaggtaaatgtgttagattccaaggaaatagagtgctcaagattgtcattatctgaaataaaatcagccacagaa  
ggatttaaatgaaaggataattggtgaaggagatctgctgtgtatgaaggagatattccttcaagggaactgttctattaagagattgtt  
caagggactagattaggtccttcacataattcatttaacactgaatttgcctctatggttgctgcttaagacacaagaatttgattcagttccaagga  
tggtgtgtgagagccggg

>TRV:*NbXIV*

gaattcattggagatggttggctttttccttcacctgataatcagacttaggtagcaggtggttcttgggtctggttaattcatccaattgacta  
agaacaagttgtgctgttgagttcgacactggcaagattgcacttaatgatcctgatgataacatgtaggtcttgatagatagccttatctc  
aatcaagactgctaataagttggctggtgtgatctcaaaagtaggaattgacttctggattgattacaagagtgaggaaaagcagttg  
ttgttcttgagttactcaagttccaagcctaaaaaccactctgactgtggatattgacctgtctgattatctaaaggagttatgtacgtggggtt  
gctcccggg

>TRV:*NbXVII*

gaattctaattccttttgcgacttcgctgtcctcaattcgcgatgatttagaccagcgcataaaatgtaacatacgagagagatgcttatccagcaa  
atggtgcaattcaacttaccacagaccttatcaatcgtgatataaacgcaactataggtcgagccacatattccaagctctgcatcttgggaca  
aggcctcaggaaatgcacagattcagactcacttctccttagcatcaattcacaaggcagaacaagatatggtgatggtcttgccttctgag  
aacacaaccagaggtggcagcttggccatacaagtaataactcaacgactgaatacatcggccaatcattttgtagctgtggagttgatagta  
ccagaacgtccagtatgatcccggg

>TRV:*NbXVIII*

gaattcctcagcatcaactggacaattgtttcagaaaaacaatgtcaagtctgggattcaattcaagtatgagtttgatccaaacaaagtctg  
aacatgctgaaccgccgagtgcaaatcctctattactcaagtactcctccttaaccaagaaatcagcaccagaaaaaaggaaataagg  
gactagctggtgatcgagcataggttgcctattctggtatcgtattgattactggtagctgcttttatggaagaaaaagagtaaaggaatgata  
aagaccatgttttattgatctcagtatggacaatgaatttcaaaagggtactggcctaagaagtttctatggtgaattagctcgtgcaacgaac  
aatttctgaggtacagcccggg
