# Supplementary material for: L-type lectin receptor kinases in Nicotiana benthamiana and tomato and their role in Phytophthora resistance
Source: PubMed Central journal article supplement (PMC4623685; doi:10.1093/jxb/erv379), 2015-08-05
Supplement: supp_erv379_Supplementary_Table_S1.pdf [file supp_erv379_Supplementary_Table_S1.pdf]

**Supplementary Table S1.** Primers used in this study.

| Primers              | 5'-3'                              | Used to                                                |
|----------------------|------------------------------------|--------------------------------------------------------|
| NbS00026192g0010.1-F | TCTCCCCTTAGTCTGTCA GTT             | Amplify <i>NbS00026192g0010.1</i>                      |
| NbS00026192g0010.1-R | ACAATCCACCGAACAAAACCA              |                                                        |
| NbLecRK-VIII.2-RT-F  | CTGACCCTATGGTTAGACCAACAATG         | Check the silencing efficiency of TRV: <i>NbVIII.2</i> |
| NbLecRK-VIII.2-RT-R  | GAAGGTCTAGTTCTTGGGACAATTGG         |                                                        |
| NbLecRK-IX-RT-F      | TGATCTTGAAAAGGGAACAGGACCG          | Check the silencing efficiency of TRV: <i>NbIX</i>     |
| NbLecRK-IX-RT-R      | TTGTAAACTTCTCCAAATCCTCCTTCG        |                                                        |
| NbLecRK-X-RT-F       | GTTCTCTAAGGATGAGCTACTTGGG          | Check the silencing efficiency of TRV: <i>NbX</i>      |
| NbLecRK-X-RT-R       | GAGTCATGGTTCACACATTTCACTGC         |                                                        |
| NbLecRK-XIII-RT-F    | CGTCTTTTCTGGCGTTCCA ACTG           | Check the silencing efficiency of TRV: <i>NbXIII</i>   |
| NbLecRK-XIII-RT-R    | CCACATTCATCGATAGGCTTTCTCC          |                                                        |
| NbLecRK-XIV-RT-F     | ATGGGATACCTTGCTCCTGAGTACC          | Check the silencing efficiency of TRV: <i>NbXIV</i>    |
| NbLecRK-XIV-RT-R     | CCCACAAGCCACTTCTAGTATAACCAC        |                                                        |
| NbLecRK-XVII-RT-F    | TGGTGGTTGTGTTTTGGTTTTGTATGTG       | Check the silencing efficiency of TRV: <i>NbXVII</i>   |
| NbLecRK-XVII-RT-R    | GTAAGGAACTTCTTTGGTCCTGTGC          |                                                        |
| NbLecRK-XVIII-RT-F   | CAAATGGAGCGTTTAATGGTTCTCG          | Check the silencing efficiency of TRV: <i>NbXVIII</i>  |
| NbLecRK-XVIII-RT-R   | TCAGAATTAAGAACATGGATTGCTTGC        |                                                        |
| SlLecRK-IX-RT-F      | TCAGAGGAACGAAAATTAGGTGAAGG         | Check the silencing efficiency of TRV: <i>SIX</i>      |
| SlLecRK-IX-RT-R      | TCCCCTGCTTAGACCCCTCTCG             |                                                        |
| Oligo-dT             | GACTCGAGTCGACATCGATTTTTTTTTTTTTTTT | synthesize cDNA                                        |
